# Supplementary material for: Comparison of Intracellular Transcriptional Response of NHBE Cells to Infection with SARS-CoV-2 Washington and New York Strains
Source: Frontiers journal article supplement (doi:10.3389/fcimb.2022.1009328), 2022-09-20

## NY 6hpi

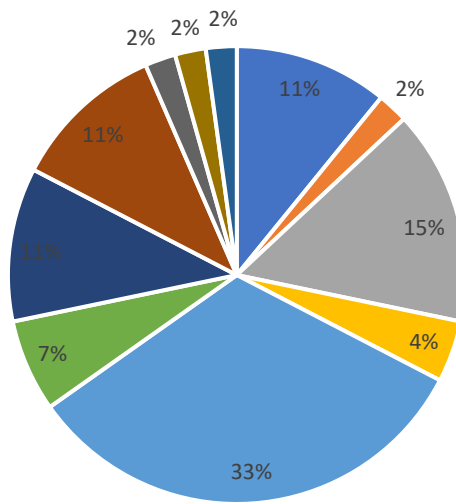

- Metabolism
- Respiration
- Immune Response
- Hormone
- Signaling
- Adhesion
- Development
- DNA Replication
- Apoptosis

## WA 6hpi

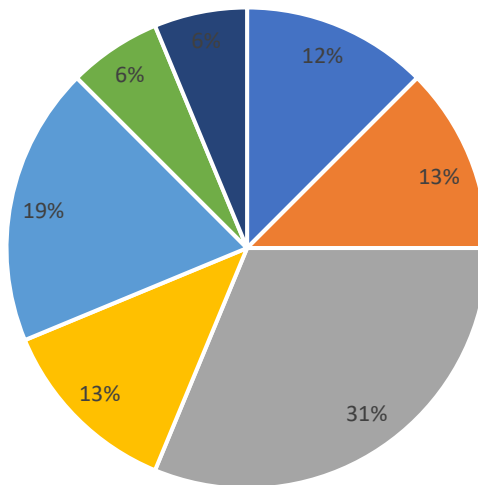

- Metabolism
- Development
- Immune Response
- Respiration
- Hormone
- Signaling
- Translation

## NY 12hpi

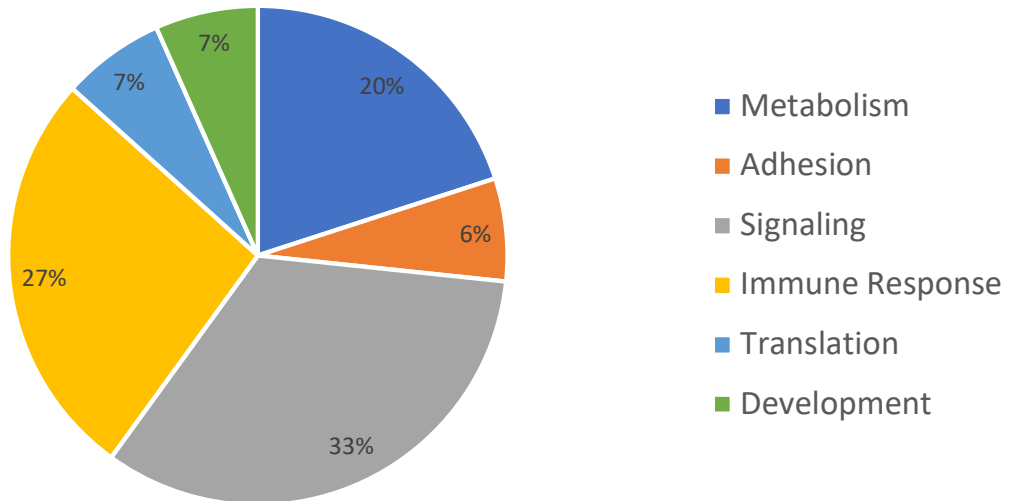

## WA 12hpi

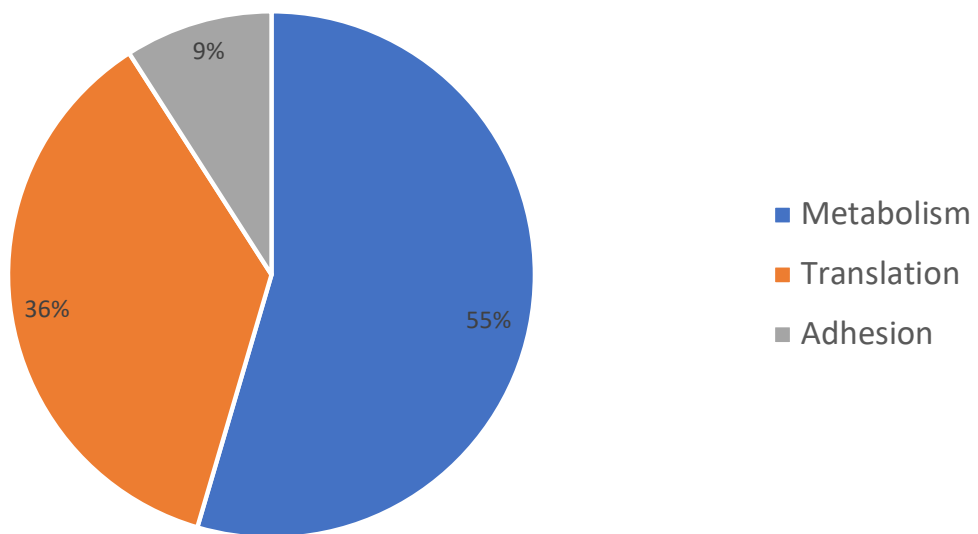

Supplement: Image_1.PDF [file Image_1.PDF]
