# Supplementary material for: Comparison of Intracellular Transcriptional Response of NHBE Cells to Infection with SARS-CoV-2 Washington and New York Strains
Source: Front Cell Infect Microbiol. 2022 Sep 20;12:1009328. doi: 10.3389/fcimb.2022.1009328 (PMC9530606; doi:10.3389/fcimb.2022.1009328)
Supplement: Supplementary Table 12 — Significant affected functional terms in the WA isolate (infected vs mock-infected) at 12hpi. [file Table_12.xlsx]

## Sheet: Supplementary_Table_12-camera_d
GeneSet	NGenes	Correlation	Direction	PValue	FDR
GO_DETOXIFICATION_OF_INORGANIC_COMPOUND	11	0.144381	Down	1.03e-10	2.05e-06
REACTOME_METALLOTHIONEINS_BIND_METALS	7	0.362871	Down	1.7e-09	1.7e-05
REACTOME_RESPONSE_TO_METAL_IONS	9	0.264811	Down	9.38e-09	6.25e-05
ZHENG_RESPONSE_TO_ARSENITE_UP	13	0.058848	Down	1.18e-07	0.00058754
GO_BOX_C_D_SNORNP_COMPLEX	6	0.0382391	Down	6.97e-07	0.00278536
FUNG_IL2_SIGNALING_2	6	0.0809975	Down	1.13e-06	0.00374997
GO_CELLULAR_RESPONSE_TO_ZINC_ION	15	0.150163	Down	4.07e-06	0.00927387
MONTERO_THYROID_CANCER_POOR_SURVIVAL_UP	12	0.0247626	Up	4.14e-06	0.00927387
NADELLA_PRKAR1A_TARGETS_DN	5	0.043223	Down	4.37e-06	0.00927387
HP_ORTHOKERATOSIS	8	0.00356741	Up	4.64e-06	0.00927387
GO_SMALL_SUBUNIT_PROCESSOME	41	0.0621442	Down	7.47e-06	0.0135731
GO_CALCIUM_INDEPENDENT_CELL_CELL_ADHESION_VIA_PLASMA_MEMBRANE_CELL_ADHESION_MOLECULES	10	-0.0126232	Up	8.45e-06	0.0140622
REACTOME_RRNA_MODIFICATION_IN_THE_NUCLEUS_AND_CYTOSOL	68	0.0631661	Down	1.42e-05	0.0218169
LIANG_SILENCED_BY_METHYLATION_DN	9	0.00128446	Up	2.01e-05	0.0286599
GO_CELLULAR_RESPONSE_TO_COPPER_ION	21	0.0485237	Down	2.33e-05	0.0310668
GO_NEGATIVE_REGULATION_OF_VITAMIN_D_BIOSYNTHETIC_PROCESS	4	-0.0115956	Down	2.66e-05	0.0332498
REACTOME_TIGHT_JUNCTION_INTERACTIONS	16	0.0355622	Up	2.95e-05	0.0347007
GO_PRERIBOSOME	80	0.0812904	Down	3.18e-05	0.0352342
GO_REGULATION_OF_CELLULAR_PH_REDUCTION	4	0.0168456	Up	3.67e-05	0.0370708
GO_CELLULAR_RESPONSE_TO_CADMIUM_ION	32	0.0400765	Down	3.71e-05	0.0370708
GO_PRE_SNORNP_COMPLEX	9	-0.00616104	Down	4.1e-05	0.0389799
WP_LET7_INHIBITION_OF_ES_CELL_REPROGRAMMING	5	-0.0506725	Down	4.66e-05	0.0423415
MARIADASON_RESPONSE_TO_BUTYRATE_CURCUMIN_SULINDAC_TSA_1	8	0.0754172	Down	5.03e-05	0.0436541
GO_NEGATIVE_REGULATION_OF_VITAMIN_METABOLIC_PROCESS	5	0.0139511	Down	7.18e-05	0.0597402
REACTOME_POU5F1_OCT4_SOX2_NANOG_REPRESS_GENES_RELATED_TO_DIFFERENTIATION	7	-0.010588	Down	7.6e-05	0.0607354
WP_ZINC_HOMEOSTASIS	31	0.0635944	Down	9.35e-05	0.0718016
GO_POSITIVE_REGULATION_OF_INSULIN_LIKE_GROWTH_FACTOR_RECEPTOR_SIGNALING_PATHWAY	5	0.138305	Up	0.000104266	0.0771379
GO_RESPONSE_TO_COPPER_ION	34	0.0335977	Down	0.000119	0.0848939
WP_MIR517_RELATIONSHIP_WITH_ARCN1_AND_USP1	5	0.139898	Up	0.000139543	0.0961164
GO_CORNIFIED_ENVELOPE	36	0.0827905	Up	0.000149468	0.099521
GO_RIBOSOMAL_LARGE_SUBUNIT_BIOGENESIS	73	0.0819653	Down	0.000157981	0.101796
GO_RIBOSOMAL_LARGE_SUBUNIT_ASSEMBLY	28	0.0905685	Down	0.000180663	0.112398
GO_U3_SNORNA_BINDING	10	0.079959	Down	0.000185688	0.112398
GO_SNORNA_BINDING	32	0.0916729	Down	0.000195309	0.112814
TSAI_DNAJB4_TARGETS_DN	6	0.0820928	Down	0.000197671	0.112814
GO_PRERIBOSOME_LARGE_SUBUNIT_PRECURSOR	23	0.0675364	Down	0.000212295	0.117794
GO_MATURATION_OF_LSU_RRNA	29	0.0656481	Down	0.000276841	0.148999
GO_RIBOSOME_BIOGENESIS	317	0.0610104	Down	0.000283452	0.148999
GO_ENDODERMAL_CELL_FATE_COMMITMENT	11	-0.0318693	Down	0.000301404	0.154373
SCHLESINGER_METHYLATED_IN_COLON_CANCER	5	-0.00396328	Down	0.000324283	0.161939
GO_SMALL_NUCLEOLAR_RIBONUCLEOPROTEIN_COMPLEX	23	0.0691728	Down	0.000336903	0.164138
GO_CARBON_DIOXIDE_TRANSPORT	3	0.063056	Up	0.00036457	0.16852
GO_RRNA_BINDING	69	0.069899	Down	0.000376128	0.16852
GO_PEPTIDE_CROSS_LINKING	20	0.060829	Up	0.000376814	0.16852
GO_REGULATION_OF_VITAMIN_D_BIOSYNTHETIC_PROCESS	9	-0.0347722	Down	0.000382568	0.16852
GO_ENDONUCLEOLYTIC_CLEAVAGE_IN_ITS1_TO_SEPARATE_SSU_RRNA_FROM_5_8S_RRNA_AND_LSU_RRNA_FROM_TRICISTRONIC_RRNA_TRANSCRIPT_SSU_RRNA_5_8S_RRNA_LSU_RRNA	10	0.110503	Down	0.000391676	0.16852
GO_RRNA_METABOLIC_PROCESS	244	0.0581652	Down	0.000396518	0.16852
GO_LUNG_VASCULATURE_DEVELOPMENT	4	0.122653	Up	0.000439395	0.182852
FUNG_IL2_TARGETS_WITH_STAT5_BINDING_SITES_T1	4	0.07356	Down	0.000449068	0.183064
GO_RESPONSE_TO_INTERLEUKIN_18	10	0.063497	Up	0.000476727	0.190453
SUNG_METASTASIS_STROMA_DN	51	0.0363029	Down	0.000489135	0.191578
GAUTSCHI_SRC_SIGNALING	8	0.163259	Up	0.000537363	0.20642
GO_DIPEPTIDE_TRANSMEMBRANE_TRANSPORT	5	-0.00724784	Up	0.000550295	0.207399
KANG_DOXORUBICIN_RESISTANCE_UP	56	0.0264132	Up	0.000576459	0.213236
REACTOME_TRNA_PROCESSING_IN_THE_MITOCHONDRION	5	0.0284182	Down	0.000620254	0.221817
YAO_TEMPORAL_RESPONSE_TO_PROGESTERONE_CLUSTER_3	11	-0.011979	Up	0.000639294	0.221817
GO_OPTIC_CUP_MORPHOGENESIS_INVOLVED_IN_CAMERA_TYPE_EYE_DEVELOPMENT	5	0.032492	Up	0.00065257	0.221817
LY_AGING_MIDDLE_DN	15	0.050324	Up	0.000655071	0.221817
TURJANSKI_MAPK7_TARGETS	7	0.039383	Down	0.00065949	0.221817
GO_NEURON_DEATH_IN_RESPONSE_TO_HYDROGEN_PEROXIDE	4	0.0891614	Down	0.000666283	0.221817
GO_RIBOSOMAL_SMALL_SUBUNIT_BIOGENESIS	80	0.0911384	Down	0.000680511	0.22284
GO_APICOLATERAL_PLASMA_MEMBRANE	16	0.0298363	Up	0.000704572	0.225409
GO_MATURATION_OF_5_8S_RRNA	36	0.0534642	Down	0.000710926	0.225409
GO_FAT_SOLUBLE_VITAMIN_BIOSYNTHETIC_PROCESS	12	-0.0133855	Down	0.000725758	0.226516
REACTOME_RRNA_PROCESSING	215	0.116378	Down	0.00076767	0.233638
GO_STRUCTURAL_CONSTITUENT_OF_SKIN_EPIDERMIS	6	0.0493355	Up	0.000771972	0.233638
GO_TFIID_CLASS_TRANSCRIPTION_FACTOR_COMPLEX_BINDING	10	0.0391742	Down	0.000833845	0.248598
LIN_TUMOR_ESCAPE_FROM_IMMUNE_ATTACK	13	-0.000107157	Down	0.000854488	0.251006
DONATO_CELL_CYCLE_TRETINOIN	6	0.00906264	Up	0.000905749	0.261581
GO_MATURATION_OF_SSU_RRNA_FROM_TRICISTRONIC_RRNA_TRANSCRIPT_SSU_RRNA_5_8S_RRNA_LSU_RRNA	42	0.0965816	Down	0.00091668	0.261581
LUDWICZEK_TREATING_IRON_OVERLOAD	4	-0.0792354	Down	0.000938764	0.263301
GO_REGULATION_OF_VITAMIN_METABOLIC_PROCESS	13	-0.0229125	Down	0.000949071	0.263301
GO_RIBONUCLEOPROTEIN_COMPLEX_BIOGENESIS	457	0.0553204	Down	0.00100523	0.273234
GO_NEUTROPHIL_APOPTOTIC_PROCESS	6	-0.018278	Up	0.00101223	0.273234
GO_SNORNA_LOCALIZATION	6	-0.0623245	Down	0.00106733	0.279593
GO_MITOCHONDRIAL_TRANSLATIONAL_TERMINATION	91	0.0471205	Down	0.00107377	0.279593
WP_BONE_MORPHOGENIC_PROTEIN_BMP_SIGNALLING_AND_REGULATION	12	0.0812868	Up	0.00107778	0.279593
GO_FATTY_ACID_OMEGA_OXIDATION	4	-0.0885259	Up	0.00109803	0.281194
GO_RIBOSOME_ASSEMBLY	63	0.0978459	Down	0.00111276	0.281358
GO_5S_RRNA_BINDING	11	0.0613241	Down	0.00116383	0.289561
WP_NUCLEOTIDE_GPCRS	5	0.0451172	Down	0.00117419	0.289561
ZHAN_MULTIPLE_MYELOMA_PR_UP	45	0.0230236	Up	0.00121168	0.295162
GO_MITOCHONDRIAL_RNA_3_END_PROCESSING	5	0.049193	Down	0.00126687	0.304889
GO_MATURATION_OF_5_8S_RRNA_FROM_TRICISTRONIC_RRNA_TRANSCRIPT_SSU_RRNA_5_8S_RRNA_LSU_RRNA	25	0.0574128	Down	0.00129655	0.306329
GO_MATURATION_OF_SSU_RRNA	56	0.0835465	Down	0.00130353	0.306329
GO_ENDONUCLEOLYTIC_CLEAVAGE_INVOLVED_IN_RRNA_PROCESSING	16	0.0981066	Down	0.00139327	0.320344
GO_SMALL_NUCLEOLAR_RIBONUCLEOPROTEIN_COMPLEX_ASSEMBLY	13	-0.022317	Down	0.00139707	0.320344
GO_NCRNA_PROCESSING	395	0.0497788	Down	0.00141128	0.320344
GO_CELLULAR_RESPONSE_TO_HEPARIN	4	0.177075	Down	0.00148288	0.329116
GO_RESPONSE_TO_HEPARIN	4	0.177075	Down	0.00148288	0.329116
GO_RNA_POLYMERASE_I_COMPLEX	15	0.0350213	Down	0.00150187	0.329669
GO_MALE_PRONUCLEUS	5	0.163876	Up	0.00152568	0.331256
NAKAJIMA_MAST_CELL	30	0.0604996	Down	0.00158685	0.340832
GO_ORGANELLAR_RIBOSOME	89	0.0421266	Down	0.0016569	0.347334
REACTOME_SIGNALING_BY_BMP	21	0.0515089	Up	0.00166136	0.347334
GO_GLUTATHIONE_DERIVATIVE_METABOLIC_PROCESS	15	0.0520992	Down	0.00166929	0.347334
GO_CLEAVAGE_INVOLVED_IN_RRNA_PROCESSING	28	0.0742848	Down	0.00168856	0.34772
REACTOME_MITOCHONDRIAL_TRANSLATION	96	0.0475383	Down	0.00175856	0.35658
KONDO_COLON_CANCER_HCP_WITH_H3K27ME1	19	-0.00431057	Down	0.00176728	0.35658
MULLIGAN_NTF3_SIGNALING_VIA_INSR_AND_IGF1R_UP	20	0.119633	Down	0.00180598	0.359777
GO_NEGATIVE_REGULATION_OF_SMOOTH_MUSCLE_CONTRACTION	12	0.0818893	Down	0.00182754	0.359777
FINAK_BREAST_CANCER_SDPP_SIGNATURE	7	0.0943233	Up	0.00183716	0.359777
GO_MITOCHONDRIAL_TRANSLATION	135	0.0458581	Down	0.001879	0.361834
CHEN_HOXA5_TARGETS_6HR_UP	10	0.0226551	Down	0.00188389	0.361834
HP_ABNORMALITY_OF_THE_PERIOSTEUM	5	-0.017726	Up	0.00194204	0.366069
REACTOME_POST_CHAPERONIN_TUBULIN_FOLDING_PATHWAY	18	0.0744337	Down	0.00197173	0.366069
GO_ANDROSTERONE_DEHYDROGENASE_ACTIVITY	6	0.0309618	Down	0.00197301	0.366069
DE_YY1_TARGETS_UP	13	0.0140521	Up	0.00198234	0.366069
GO_NCRNA_METABOLIC_PROCESS	462	0.0440862	Down	0.00201178	0.366069
KEGG_RNA_POLYMERASE	33	0.0325457	Down	0.0020159	0.366069
GO_CHONDROBLAST_DIFFERENTIATION	3	0.0228678	Up	0.00204699	0.368365
GO_MITOCHONDRIAL_LARGE_RIBOSOMAL_SUBUNIT	58	0.0354895	Down	0.00209859	0.372355
GO_TRANSLATIONAL_TERMINATION	107	0.0468238	Down	0.00210845	0.372355
REACTOME_NUCLEOTIDE_LIKE_PURINERGIC_RECEPTORS	6	-0.0543952	Down	0.00212508	0.372355
GO_ENDODERMAL_CELL_FATE_SPECIFICATION	4	-0.0349207	Down	0.00216962	0.37378
MCCOLLUM_GELDANAMYCIN_RESISTANCE_DN	5	-0.0182832	Down	0.00218869	0.37378
LE_SKI_TARGETS_UP	16	0.110817	Down	0.00218935	0.37378
GO_POSITIVE_REGULATION_OF_STEROID_HORMONE_SECRETION	5	0.00296233	Down	0.00229753	0.388925
GO_REGULATION_OF_T_HELPER_1_CELL_DIFFERENTIATION	6	-0.0195236	Up	0.0023891	0.39766
GO_BOX_C_D_SNORNP_ASSEMBLY	11	-0.00711912	Down	0.00242422	0.39766
GO_PURINE_NUCLEOBASE_BIOSYNTHETIC_PROCESS	12	-0.0113967	Down	0.0024324	0.39766
WP_MAMMARY_GLAND_DEVELOPMENT_PATHWAY_PUBERTY_STAGE_2_OF_4	11	0.0916857	Down	0.00244311	0.39766
HE_PTEN_TARGETS_DN	6	0.0113499	Up	0.00250958	0.39766
GO_PRERIBOSOME_SMALL_SUBUNIT_PRECURSOR	15	0.131192	Down	0.00251036	0.39766
GO_TRNA_3_END_PROCESSING	8	0.0698489	Down	0.00253185	0.39766
GO_CARTILAGE_MORPHOGENESIS	8	-0.0159531	Down	0.00257666	0.39766
MARTORIATI_MDM4_TARGETS_NEUROEPITHELIUM_DN	91	0.0142158	Up	0.0025919	0.39766
GO_HEPATIC_STELLATE_CELL_ACTIVATION	6	0.00714698	Up	0.00259613	0.39766
GO_REGULATION_OF_SKELETAL_MUSCLE_ACETYLCHOLINE_GATED_CHANNEL_CLUSTERING	3	0.0260375	Up	0.0026027	0.39766
GO_RNA_POLYMERASE_III_COMPLEX	18	0.0523489	Down	0.00260794	0.39766
REACTOME_RNA_POLYMERASE_III_CHAIN_ELONGATION	18	0.0523489	Down	0.00260794	0.39766
GO_ZINC_ION_HOMEOSTASIS	30	0.0629066	Down	0.00265198	0.398867
GO_G_PROTEIN_COUPLED_PURINERGIC_RECEPTOR_SIGNALING_PATHWAY	4	-0.0182502	Down	0.00265579	0.398867
GO_VITAMIN_D_BIOSYNTHETIC_PROCESS	10	-0.0180063	Down	0.00285271	0.423778
GO_RNA_POLYMERASE_II_GENERAL_TRANSCRIPTION_INITIATION_FACTOR_BINDING	19	0.0230445	Down	0.00286408	0.423778
GO_MITOCHONDRIAL_GENE_EXPRESSION	165	0.0443992	Down	0.00290671	0.426924
TANG_SENESCENCE_TP53_TARGETS_DN	50	0.0478523	Up	0.00293219	0.427522
GO_REGULATION_OF_ADIPONECTIN_SECRETION	6	0.105324	Up	0.00296991	0.429884
GO_FUSION_OF_SPERM_TO_EGG_PLASMA_MEMBRANE_INVOLVED_IN_SINGLE_FERTILIZATION	5	-0.0148742	Down	0.00310732	0.44534
GO_MITOCHONDRIAL_CYTOCHROME_C_OXIDASE_ASSEMBLY	22	0.0307067	Down	0.00313052	0.44534
LEE_SP4_THYMOCYTE	13	0.0271803	Down	0.00314358	0.44534
HP_PARAKERATOSIS	19	0.0654556	Up	0.00339224	0.477183
HALLMARK_MYC_TARGETS_V2	58	0.105868	Down	0.00346927	0.484588
REACTOME_TRNA_MODIFICATION_IN_THE_NUCLEUS_AND_CYTOSOL	41	0.0370545	Down	0.0034934	0.484588
GO_PROTEIN_LOCALIZATION_TO_NUCLEOLUS	14	0.0381429	Down	0.0036066	0.494054
REICHERT_G1S_REGULATORS_AS_PI3K_TARGETS	8	0.0616614	Up	0.00361111	0.494054
GO_MUSCULAR_SEPTUM_MORPHOGENESIS	4	0.0292809	Up	0.0036474	0.495625
GO_POSITIVE_REGULATION_OF_T_HELPER_CELL_DIFFERENTIATION	12	0.0279358	Up	0.00376083	0.501175
GO_P_P_BOND_HYDROLYSIS_DRIVEN_PROTEIN_TRANSMEMBRANE_TRANSPORTER_ACTIVITY	6	0.0977078	Down	0.00380424	0.501175
GO_CATALYTIC_ACTIVITY_ACTING_ON_A_TRNA	109	0.0338655	Down	0.00383585	0.501175
HP_MORPHOLOGICAL_ABNORMALITY_OF_THE_VESTIBULE_OF_THE_INNER_EAR	19	0.0290116	Up	0.00386782	0.501175
HP_THORACOLUMBAR_KYPHOSCOLIOSIS	5	0.0431655	Down	0.00386953	0.501175
GO_TRNA_METABOLIC_PROCESS	170	0.0300697	Down	0.00388366	0.501175
RICKMAN_HEAD_AND_NECK_CANCER_D	19	0.000759563	Down	0.00392985	0.501175
LEE_EARLY_T_LYMPHOCYTE_UP	96	0.0263393	Up	0.00393914	0.501175
GO_TRNA_CATABOLIC_PROCESS	11	-0.0229399	Down	0.00396999	0.501175
GO_NEGATIVE_REGULATION_OF_MHC_CLASS_II_BIOSYNTHETIC_PROCESS	3	0.0575727	Down	0.00398506	0.501175
GO_RNA_POLYMERASE_ACTIVITY	46	0.0339409	Down	0.00399808	0.501175
HP_RECURRENT_HYPOGLYCEMIA	9	0.0358754	Up	0.00401408	0.501175
GO_NEUTROPHIL_HOMEOSTASIS	10	-0.000640541	Up	0.00401442	0.501175
GO_GLUTATHIONE_TRANSFERASE_ACTIVITY	14	0.0635221	Down	0.00408655	0.505467
LIN_SILENCED_BY_TUMOR_MICROENVIRONMENT	103	0.0471672	Up	0.0040994	0.505467
GO_NCRNA_3_END_PROCESSING	40	0.0257354	Down	0.00412581	0.505601
GO_EMBRYONIC_CAMERA_TYPE_EYE_FORMATION	9	0.0414963	Up	0.00415669	0.50628
FARMER_BREAST_CANCER_CLUSTER_2	33	0.0448368	Up	0.00425592	0.51438
GO_MOLECULAR_CARRIER_ACTIVITY	10	0.0481088	Down	0.0042747	0.51438
GO_RETINAL_ROD_CELL_DIFFERENTIATION	6	-0.0660944	Down	0.00430921	0.515428
ZHU_SKIL_TARGETS_DN	9	0.0877298	Up	0.00453891	0.533474
GO_ATPASE_COUPLED_INTRAMEMBRANE_LIPID_TRANSPORTER_ACTIVITY	7	0.00321965	Up	0.00460954	0.533474
NAKAMURA_ADIPOGENESIS_EARLY_UP	57	0.0221823	Down	0.00462596	0.533474
REACTOME_TRANSLATION	283	0.102044	Down	0.00464337	0.533474
GO_TIGHT_JUNCTION	105	0.0412363	Up	0.00465469	0.533474
FLORIO_NEOCORTEX_BASAL_RADIAL_GLIA_DN	181	0.0242514	Up	0.00465512	0.533474
GO_T_HELPER_2_CELL_DIFFERENTIATION	10	0.000341195	Up	0.00470848	0.533474
GO_MYOFIBROBLAST_DIFFERENTIATION	4	0.0094244	Up	0.00470924	0.533474
GO_REGULATION_OF_MYOFIBROBLAST_DIFFERENTIATION	4	0.0094244	Up	0.00470924	0.533474
GO_RNA_5_END_PROCESSING	26	0.0538396	Down	0.00475756	0.533474
REACTOME_CYTOSOLIC_TRNA_AMINOACYLATION	6	-0.0543372	Down	0.00477513	0.533474
GO_RRNA_CONTAINING_RIBONUCLEOPROTEIN_COMPLEX_EXPORT_FROM_NUCLEUS	15	0.071517	Down	0.00478057	0.533474
WP_MACROPHAGE_MARKERS	7	0.007696	Down	0.00481819	0.534685
GO_TRNA_THREONYLCARBAMOYLADENOSINE_METABOLIC_PROCESS	14	0.0382329	Down	0.00512591	0.561116
CROONQUIST_NRAS_SIGNALING_DN	70	0.0311803	Up	0.00515773	0.561116
GO_GAS_TRANSPORT	6	-0.0056291	Up	0.00517933	0.561116
GO_REGULATION_OF_POSTSYNAPTIC_MEMBRANE_ORGANIZATION	8	-0.0241051	Up	0.00518495	0.561116
GO_REGULATION_OF_T_HELPER_2_CELL_DIFFERENTIATION	8	-0.00334705	Up	0.00521135	0.561116
GO_NUCLEOLUS_ORGANIZATION	7	0.0403205	Down	0.00523693	0.561116
WU_APOPTOSIS_BY_CDKN1A_VIA_TP53	51	0.0437303	Up	0.005253	0.561116
GO_LABYRINTHINE_LAYER_BLOOD_VESSEL_DEVELOPMENT	20	0.0820892	Up	0.00529164	0.562237
IRITANI_MAD1_TARGETS_DN	45	0.0575703	Down	0.00534336	0.564728
GO_POSTSYNAPTIC_MEMBRANE_ORGANIZATION	26	0.00490741	Up	0.00543978	0.571654
HP_MESANGIAL_ABNORMALITY	14	0.0191807	Down	0.00546612	0.571654
HP_SPLIT_NAIL	8	0.0830949	Down	0.00550907	0.573144
GO_NEGATIVE_REGULATION_OF_B_CELL_DIFFERENTIATION	4	0.0261323	Down	0.00559548	0.578417
GO_90S_PRERIBOSOME	30	0.137486	Down	0.00561767	0.578417
TIAN_TNF_SIGNALING_VIA_NFKB	23	0.0621469	Up	0.0057791	0.591987
ZERBINI_RESPONSE_TO_SULINDAC_DN	6	0.00328109	Up	0.00588345	0.599602
GO_NEGATIVE_REGULATION_OF_MYOTUBE_DIFFERENTIATION	9	-0.0114575	Up	0.00593912	0.602203
HP_GLUCAGONOMA	5	0.171074	Up	0.00617323	0.608198
HP_INSULINOMA	5	0.171074	Up	0.00617323	0.608198
HP_PANCREATIC_ISLET_CELL_ADENOMA	5	0.171074	Up	0.00617323	0.608198
WP_PURINE_METABOLISM	11	0.040889	Down	0.00621378	0.608198
GO_POSITIVE_REGULATION_OF_MYELOID_CELL_APOPTOTIC_PROCESS	7	0.00751642	Up	0.0062151	0.608198
GO_RESPIRATORY_CHAIN_COMPLEX_IV_ASSEMBLY	26	0.0266724	Down	0.00624859	0.608198
HP_THORACIC_AORTA_CALCIFICATION	3	0.0721427	Up	0.0062564	0.608198
GO_AUTOLYSOSOME	10	0.0807821	Down	0.00626014	0.608198
GO_RESPONSE_TO_CADMIUM_ION	53	0.0497597	Down	0.00627228	0.608198
GO_TRANSLATIONAL_ELONGATION	135	0.0394051	Down	0.00636101	0.613822
GO_TESTOSTERONE_DEHYDROGENASE_NAD_P_ACTIVITY	7	-0.0173862	Down	0.0063938	0.61402
IYENGAR_RESPONSE_TO_ADIPOCYTE_FACTORS	10	0.0596688	Down	0.00646387	0.617779
ROSTY_CERVICAL_CANCER_PROLIFERATION_CLUSTER	140	0.0303247	Up	0.00655828	0.620011
GO_MANGANESE_ION_TRANSMEMBRANE_TRANSPORT	8	-0.00234828	Up	0.00660736	0.620011
GO_MANGANESE_ION_TRANSMEMBRANE_TRANSPORTER_ACTIVITY	8	-0.00234828	Up	0.00660736	0.620011
GO_PURINE_NUCLEOBASE_METABOLIC_PROCESS	18	0.0109016	Down	0.00663265	0.620011
HP_ABNORMALITY_OF_THE_PROXIMAL_PHALANX_OF_THE_THUMB	6	0.0924649	Up	0.00664242	0.620011
HP_APLASIA_HYPOPLASIA_OF_THE_MIDDLE_PHALANGES_OF_THE_TOES	4	0.0254886	Up	0.00667823	0.620454
HP_CRYPTOPHTHALMOS	4	-0.031236	Down	0.00670943	0.620467
HP_ZOLLINGER_ELLISON_SYNDROME	10	0.0134079	Up	0.00684312	0.625621
REACTOME_TRNA_AMINOACYLATION	26	0.0190647	Down	0.00684492	0.625621
GO_REGULATION_OF_LYMPHANGIOGENESIS	5	0.00952084	Down	0.00687907	0.625621
GO_RIBONUCLEOPROTEIN_COMPLEX_SUBUNIT_ORGANIZATION	206	0.0529114	Down	0.00689044	0.625621
GO_OLIGOPEPTIDE_BINDING	10	0.0782665	Down	0.00698205	0.628621
GAVIN_IL2_RESPONSIVE_FOXP3_TARGETS_DN	3	0.123147	Up	0.00705941	0.628621
GO_RELAXATION_OF_MUSCLE	19	0.0521419	Down	0.00707061	0.628621
GO_RIBOSOMAL_SUBUNIT	189	0.138196	Down	0.00708542	0.628621
GO_MATURATION_OF_LSU_RRNA_FROM_TRICISTRONIC_RRNA_TRANSCRIPT_SSU_RRNA_5_8S_RRNA_LSU_RRNA	16	0.0468297	Down	0.00713848	0.628621
GO_ENDODERMAL_CELL_DIFFERENTIATION	33	0.0281199	Down	0.00714621	0.628621
SCHUHMACHER_MYC_TARGETS_UP	76	0.0747092	Down	0.00715969	0.628621
HP_APLASIA_OF_THE_SEMICIRCULAR_CANAL	14	0.070659	Up	0.00718833	0.628621
GO_SMALL_RIBOSOMAL_SUBUNIT	78	0.136462	Down	0.00720672	0.628621
HP_ABNORMAL_TRABECULAR_BONE_MORPHOLOGY	26	0.0133154	Down	0.00728329	0.632501
GO_RRNA_5_END_PROCESSING	5	0.192016	Down	0.00737552	0.632501
GO_NEGATIVE_REGULATION_OF_MUSCLE_CONTRACTION	18	0.0374009	Down	0.00740541	0.632501
AMIT_SERUM_RESPONSE_120_MCF10A	65	0.0559021	Up	0.00740782	0.632501
ZHENG_IL22_SIGNALING_UP	43	0.0435851	Up	0.00741258	0.632501
HP_EXTRAHEPATIC_CHOLESTASIS	13	0.049307	Up	0.00744119	0.632501
REACTOME_CELL_CELL_JUNCTION_ORGANIZATION	40	0.0682772	Up	0.00756422	0.640234
GO_STRUCTURAL_CONSTITUENT_OF_RIBOSOME	163	0.169549	Down	0.00762883	0.642979
GO_RESPONSE_TO_NITROSATIVE_STRESS	9	0.00276341	Down	0.00771947	0.645216
BERENJENO_TRANSFORMED_BY_RHOA_REVERSIBLY_UP	7	0.0221007	Down	0.00774699	0.645216
GO_NEGATIVE_REGULATION_OF_CALCIUM_ION_IMPORT	8	-0.0300525	Down	0.00775228	0.645216
GO_CHORIO_ALLANTOIC_FUSION	5	0.0767071	Up	0.00779612	0.646172
GO_TRNA_PROCESSING	129	0.0328494	Down	0.00795179	0.647295
KIM_MYC_AMPLIFICATION_TARGETS_UP	176	0.0479029	Down	0.00795674	0.647295
GO_PROTEIN_INSERTION_INTO_MITOCHONDRIAL_INNER_MEMBRANE	10	0.0214138	Down	0.00798105	0.647295
GO_GRANULAR_COMPONENT	5	0.138754	Down	0.0080238	0.647295
GO_VITAMIN_BIOSYNTHETIC_PROCESS	17	0.000252424	Down	0.00803158	0.647295
GO_REGULATION_OF_SYSTEMIC_ARTERIAL_BLOOD_PRESSURE_BY_NOREPINEPHRINE_EPINEPHRINE	5	0.0420168	Down	0.00806467	0.647295
GO_RIBOSOME	232	0.109894	Down	0.0080941	0.647295
GO_TRANSCRIPTION_ELONGATION_FROM_RNA_POLYMERASE_I_PROMOTER	36	0.0209241	Down	0.00810681	0.647295
NIKOLSKY_BREAST_CANCER_1Q32_AMPLICON	7	0.0137589	Up	0.00814215	0.647295
HERNANDEZ_MITOTIC_ARREST_BY_DOCETAXEL_1_DN	33	0.00616863	Down	0.00817207	0.647295
BLANCO_MELO_SARS_COV_1_INFECTION_MCR5_CELLS_UP	11	0.0475788	Up	0.00818593	0.647295
GO_CARDIAC_MUSCLE_TISSUE_REGENERATION	3	0.291874	Up	0.00823457	0.647295
TOMIDA_METASTASIS_DN	13	0.00841191	Down	0.00826202	0.647295
YAO_TEMPORAL_RESPONSE_TO_PROGESTERONE_CLUSTER_11	86	0.0818669	Down	0.0082696	0.647295
KEGG_PURINE_METABOLISM	133	0.0242214	Down	0.00829574	0.647295
GO_CELLULAR_TRIGLYCERIDE_HOMEOSTASIS	5	-0.0387692	Up	0.00833166	0.647568
HP_THIN_NAIL	14	-0.0119346	Up	0.00840664	0.650863
GO_RELAXATION_OF_SMOOTH_MUSCLE	7	0.173386	Down	0.00857591	0.660259
WP_MITOCHONDRIAL_CIV_ASSEMBLY	35	0.0316116	Down	0.00859411	0.660259
GO_NEGATIVE_REGULATION_OF_CHONDROCYTE_PROLIFERATION	3	0.146385	Up	0.00873831	0.661432
GO_NEURAL_CREST_CELL_DIFFERENTIATION	66	0.0174182	Down	0.00875977	0.661432
GO_PROTEASOME_CORE_COMPLEX_BETA_SUBUNIT_COMPLEX	13	0.0348486	Down	0.00879252	0.661432
GO_TRNA_METHYLTRANSFERASE_ACTIVITY	34	0.0323059	Down	0.00891664	0.661432
SAENZ_DETOX_PATHWAY_AND_CARCINOGENESIS_DN	8	-0.0146712	Down	0.00892243	0.661432
GO_MPP7_DLG1_LIN7_COMPLEX	4	-0.0461053	Up	0.00893212	0.661432
GO_LARGE_RIBOSOMAL_SUBUNIT	114	0.137487	Down	0.00894347	0.661432
REACTOME_TRANSCRIPTION_OF_E2F_TARGETS_UNDER_NEGATIVE_CONTROL_BY_P107_RBL1_AND_P130_RBL2_IN_COMPLEX_WITH_HDAC1	16	-0.00342073	Up	0.00904238	0.661432
GO_GLIAL_CELL_FATE_COMMITMENT	8	-0.0247093	Down	0.00907222	0.661432
GO_RENAL_VESICLE_FORMATION	7	-0.0620265	Down	0.00907496	0.661432
GAJATE_RESPONSE_TO_TRABECTEDIN_DN	17	0.0180522	Down	0.00909891	0.661432
GO_TRNA_5_END_PROCESSING	19	0.0395288	Down	0.00909973	0.661432
BIOCARTA_IRES_PATHWAY	7	0.0431101	Down	0.00911686	0.661432
MCGOWAN_RSP6_TARGETS_UP	12	0.00183367	Down	0.00911953	0.661432
GO_POSITIVE_REGULATION_OF_T_HELPER_1_CELL_DIFFERENTIATION	3	0.17721	Up	0.00914294	0.661432
REACTOME_AMPK_INHIBITS_CHREBP_TRANSCRIPTIONAL_ACTIVATION_ACTIVITY	7	0.0339097	Up	0.00916562	0.661432
HORTON_SREBF_TARGETS	27	0.0799638	Up	0.0091723	0.661432
GO_NEGATIVE_REGULATION_OF_HAIR_CYCLE	5	-0.0254346	Up	0.00934521	0.66618
GO_SPLICEOSOMAL_SNRNP_ASSEMBLY	44	0.0374908	Down	0.0093696	0.66618
GO_EMBRYONIC_EYE_MORPHOGENESIS	25	0.035493	Up	0.0093724	0.66618
COLDREN_GEFITINIB_RESISTANCE_DN	221	0.0448274	Up	0.00938389	0.66618
GO_U1_SNRNA_BINDING	8	0.0220156	Down	0.00940489	0.66618
WP_ETHANOL_METABOLISM_RESULTING_IN_PRODUCTION_OF_ROS_BY_CYP2E1	10	-0.00678556	Up	0.00946241	0.666671
ONO_FOXP3_TARGETS_DN	27	0.0111913	Up	0.00952743	0.666671
MATZUK_SPERMATOGONIA	11	-3.8e-05	Up	0.00961034	0.666671
GO_NEGATIVE_REGULATION_OF_MEIOTIC_CELL_CYCLE	11	0.0334435	Up	0.00966718	0.666671
CROONQUIST_IL6_DEPRIVATION_DN	93	0.0273766	Up	0.00969857	0.666671
HOLLEMAN_ASPARAGINASE_RESISTANCE_B_ALL_UP	27	0.139328	Down	0.00971853	0.666671
WP_FATTY_ACID_OMEGA_OXIDATION	5	-0.0184601	Up	0.00972082	0.666671
REACTOME_PTK6_PROMOTES_HIF1A_STABILIZATION	6	-0.0442433	Down	0.00977818	0.666671
HP_PILI_TORTI	11	0.0612083	Up	0.00984088	0.666671
GREENBAUM_E2A_TARGETS_UP	31	0.0460469	Up	0.00985656	0.666671
GO_PRONUCLEUS	13	0.0429965	Up	0.00986281	0.666671
GO_REGULATION_OF_CHLORIDE_TRANSPORT	6	0.0819069	Up	0.00988957	0.666671
GO_MUCUS_SECRETION	8	-0.02356	Down	0.00990105	0.666671
GO_TRNA_GUANINE_METHYLTRANSFERASE_ACTIVITY	13	0.0743212	Down	0.00991602	0.666671
SCHLOSSER_MYC_TARGETS_AND_SERUM_RESPONSE_DN	48	0.0882978	Down	0.00997652	0.666671
RAMPON_ENRICHED_LEARNING_ENVIRONMENT_EARLY_DN	8	0.00430024	Up	0.00999364	0.666671
BLANCO_MELO_BRONCHIAL_EPITHELIAL_CELLS_INFLUENZA_A_DEL_NS1_INFECTION_DN	180	0.0230718	Up	0.0100374	0.666671
GO_AMINO_ACID_ACTIVATION	32	0.026825	Down	0.0100379	0.666671
GO_MITOCHONDRIAL_SMALL_RIBOSOMAL_SUBUNIT	29	0.0532852	Down	0.0100591	0.666671
GO_NEGATIVE_REGULATION_OF_DOUBLE_STRAND_BREAK_REPAIR_VIA_NONHOMOLOGOUS_END_JOINING	7	0.0391809	Down	0.0100793	0.666671
REACTOME_RNA_POLYMERASE_I_PROMOTER_ESCAPE	38	0.0260856	Down	0.0101468	0.667412
GO_CHEMOKINE_ACTIVITY	15	0.0708359	Up	0.0101574	0.667412
GO_POSITIVE_REGULATION_OF_TELOMERASE_RNA_LOCALIZATION_TO_CAJAL_BODY	15	0.0609044	Down	0.0102385	0.670536
GO_SEQUESTERING_OF_ZINC_ION	7	0.0927408	Up	0.0102979	0.672221
GO_RESPONSE_TO_GRAVITY	6	0.130244	Down	0.0103606	0.67223
GO_THIOREDOXIN_PEROXIDASE_ACTIVITY	5	0.173261	Down	0.0104118	0.67223
GO_PSEUDOPODIUM_ORGANIZATION	14	0.0183058	Up	0.0104223	0.67223
GO_TESTOSTERONE_DEHYDROGENASE_NADPLUS_ACTIVITY	6	-0.0302298	Down	0.0104381	0.67223
GO_PEPTIDASE_ACTIVATOR_ACTIVITY_INVOLVED_IN_APOPTOTIC_PROCESS	18	0.00717083	Down	0.0105698	0.67223
GO_STEROID_HORMONE_SECRETION	12	0.0141268	Down	0.0105992	0.67223
GO_CELL_PROLIFERATION_INVOLVED_IN_METANEPHROS_DEVELOPMENT	6	0.0285614	Down	0.0106133	0.67223
HP_ABNORMALITY_OF_THE_EXTRINSIC_PATHWAY	12	0.0130075	Down	0.0106256	0.67223
GO_EUKARYOTIC_TRANSLATION_INITIATION_FACTOR_3_COMPLEX_EIF3M	7	0.0275734	Down	0.0106313	0.67223
GO_RRNA_MODIFICATION	39	0.0328917	Down	0.0106345	0.67223
HP_ROUGH_BONE_TRABECULATION	20	0.00923213	Down	0.0107204	0.675118
REACTOME_TRNA_PROCESSING	110	0.0391048	Down	0.0107478	0.675118
GO_AXON_HILLOCK	7	-0.0163458	Up	0.010974	0.684765
GO_RESPONSE_TO_ERYTHROPOIETIN	4	0.271948	Down	0.0110487	0.684765
GO_TELOMERASE_RNA_LOCALIZATION	20	0.0517802	Down	0.0110616	0.684765
GO_EMBRYONIC_CAMERA_TYPE_EYE_MORPHOGENESIS	19	0.0346207	Up	0.0110746	0.684765
GO_POSITIVE_REGULATION_OF_MULTI_ORGANISM_PROCESS	26	0.0154085	Down	0.0110845	0.684765
GO_STEM_CELL_FATE_COMMITMENT	3	0.253924	Down	0.0111071	0.684765
GO_ENDONUCLEOLYTIC_CLEAVAGE_IN_5_ETS_OF_TRICISTRONIC_RRNA_TRANSCRIPT_SSU_RRNA_5_8S_RRNA_LSU_RRNA	8	0.13607	Down	0.0111478	0.685163
GO_HYALURONIC_ACID_BINDING	10	-0.00675508	Down	0.0112443	0.686294
WP_PYRIMIDINE_METABOLISM	84	0.0352919	Down	0.0112522	0.686294
GO_REGULATION_OF_GONADOTROPIN_SECRETION	3	0.114198	Down	0.0113099	0.686294
GO_ARYLESTERASE_ACTIVITY	3	-0.148775	Up	0.0113156	0.686294
GO_OXYSTEROL_BINDING	6	0.0264072	Up	0.011338	0.686294
GO_MONOCYTE_ACTIVATION	9	-0.050434	Down	0.0114028	0.68813
GO_L_ARGININE_TRANSPORT	5	0.00607638	Up	0.011511	0.692564
GO_3_UTR_MEDIATED_MRNA_DESTABILIZATION	16	0.0456489	Up	0.0116414	0.694913
KRIGE_AMINO_ACID_DEPRIVATION	24	0.0373364	Up	0.0116469	0.694913
HP_LOSS_OF_PURKINJE_CELLS_IN_THE_CEREBELLAR_VERMIS	4	0.0903061	Down	0.0116544	0.694913
IZADPANAH_STEM_CELL_ADIPOSE_VS_BONE_UP	120	0.0295403	Down	0.0117699	0.697278
GROSS_HYPOXIA_VIA_HIF1A_UP	77	0.0346095	Down	0.0117924	0.697278
HP_EPIDERMAL_ACANTHOSIS	34	0.0732865	Up	0.0118511	0.697278
GO_EMBRYONIC_PROCESS_INVOLVED_IN_FEMALE_PREGNANCY	4	-0.0405339	Up	0.0118683	0.697278
BHAT_ESR1_TARGETS_VIA_AKT1_DN	77	0.0341835	Up	0.0118686	0.697278
HALMOS_CEBPA_TARGETS_DN	38	0.0604237	Up	0.0119389	0.699264
REACTOME_RNA_POLYMERASE_III_TRANSCRIPTION_INITIATION_FROM_TYPE_3_PROMOTER	30	0.0241568	Down	0.0119874	0.699264
WP_COPPER_HOMEOSTASIS	50	0.0418459	Down	0.012038	0.699264
IGLESIAS_E2F_TARGETS_DN	6	-0.0282894	Down	0.0120424	0.699264
MYLLYKANGAS_AMPLIFICATION_HOT_SPOT_21	4	-0.0565771	Down	0.0121902	0.704374
GO_TRNA_BINDING	57	0.0387531	Down	0.0122009	0.704374
PECE_MAMMARY_STEM_CELL_UP	143	0.132496	Down	0.0122707	0.706363
GO_HISTONE_H2A_PHOSPHORYLATION	5	-0.0364156	Down	0.0123171	0.706995
HP_DISTAL_RENAL_TUBULAR_ACIDOSIS	4	-0.0258562	Up	0.012392	0.707337
GO_CERAMIDE_1_PHOSPHATE_TRANSPORT	6	0.168223	Up	0.0124669	0.707337
GO_REGULATION_OF_T_HELPER_1_TYPE_IMMUNE_RESPONSE	17	0.027009	Up	0.0124762	0.707337
GO_NUCLEOBASE_BIOSYNTHETIC_PROCESS	20	0.000280612	Down	0.0125	0.707337
MALTA_CURATED_STEMNESS_MARKERS	15	-0.0252408	Down	0.0125001	0.707337
GO_RESPONSE_TO_CORTICOTROPIN_RELEASING_HORMONE	3	-0.00624461	Down	0.0126235	0.711999
HP_REDUCED_FACTOR_XI_ACTIVITY	5	-0.00848995	Down	0.0126538	0.711999
NAKAYAMA_SOFT_TISSUE_TUMORS_PCA2_UP	68	0.0470812	Up	0.0127016	0.712683
ZWANG_EGF_INTERVAL_UP	67	0.0268473	Up	0.0128354	0.717785
GO_ESTABLISHMENT_OF_ENDOTHELIAL_INTESTINAL_BARRIER	11	0.108982	Up	0.0128644	0.717785
GO_MITOCHONDRIAL_RNA_PROCESSING	17	0.0649801	Down	0.0129031	0.717938
REACTOME_TRANSCRIPTIONAL_REGULATION_OF_PLURIPOTENT_STEM_CELLS	19	0.0114228	Down	0.0130147	0.722136
GO_DETOXIFICATION	95	0.0475953	Down	0.0131204	0.723407
HP_EXTRAMEDULLARY_HEMATOPOIESIS	12	-0.00755675	Up	0.0131275	0.723407
GO_UBIQUITIN_LIGASE_INHIBITOR_ACTIVITY	5	0.179222	Down	0.0132429	0.723407
REACTOME_DISPLACEMENT_OF_DNA_GLYCOSYLASE_BY_APEX1	9	0.0165782	Down	0.0132515	0.723407
HP_ABNORMALITY_OF_THE_PUBIC_HAIR	31	0.0408485	Down	0.013308	0.723407
WP_PURINE_METABOLISM_AND_RELATED_DISORDERS	20	0.0379955	Down	0.0133573	0.723407
GO_POSITIVE_REGULATION_OF_OOGENESIS	4	0.0827227	Down	0.013367	0.723407
PEREZ_TP53_AND_TP63_TARGETS	178	0.0551648	Up	0.013392	0.723407
GO_PLACENTA_BLOOD_VESSEL_DEVELOPMENT	31	0.0801628	Up	0.013463	0.723407
GO_POLYOL_TRANSMEMBRANE_TRANSPORTER_ACTIVITY	3	-0.0439463	Down	0.0134685	0.723407
HP_NIGHT_SWEATS	7	0.00114131	Up	0.0135082	0.723407
GO_REGULATION_OF_HEPATIC_STELLATE_CELL_ACTIVATION	4	-0.0511872	Up	0.0135337	0.723407
EGUCHI_CELL_CYCLE_RB1_TARGETS	22	0.0230705	Up	0.0135564	0.723407
GO_ICOSANOID_BINDING	4	0.204381	Up	0.0136054	0.723407
GO_REGULATION_OF_BRANCHING_INVOLVED_IN_LUNG_MORPHOGENESIS	7	-0.0527003	Down	0.0136438	0.723407
AMIT_DELAYED_EARLY_GENES	18	0.0790416	Up	0.0136591	0.723407
GO_NUCLEOTIDE_BINDING_OLIGOMERIZATION_DOMAIN_CONTAINING_1_SIGNALING_PATHWAY	4	0.222094	Up	0.0136636	0.723407
GO_APICAL_JUNCTION_COMPLEX	117	0.0479476	Up	0.0136895	0.723407
COLLER_MYC_TARGETS_UP	23	0.0756525	Down	0.0138684	0.727936
GARGALOVIC_RESPONSE_TO_OXIDIZED_PHOSPHOLIPIDS_BLACK_DN	10	0.0287935	Down	0.0138834	0.727936
GO_SMN_SM_PROTEIN_COMPLEX	20	0.0244701	Down	0.0138845	0.727936
GO_TRNA_METHYLATION	40	0.0408405	Down	0.0139617	0.730064
GO_GLUTAMINE_FAMILY_AMINO_ACID_BIOSYNTHETIC_PROCESS	15	0.029601	Down	0.0140695	0.73378
BIOCARTA_EIF_PATHWAY	17	0.0217923	Down	0.0141956	0.738431
GO_CYTOSOLIC_SMALL_RIBOSOMAL_SUBUNIT	50	0.21962	Down	0.0142692	0.738737
GO_BOX_H_ACA_RNP_COMPLEX	5	0.11235	Down	0.0143494	0.738737
GO_BOX_H_ACA_SNORNA_BINDING	5	0.11235	Down	0.0143494	0.738737
GO_BOX_H_ACA_SNORNP_COMPLEX	5	0.11235	Down	0.0143494	0.738737
REACTOME_ACTIVATION_OF_THE_MRNA_UPON_BINDING_OF_THE_CAP_BINDING_COMPLEX_AND_EIFS_AND_SUBSEQUENT_BINDING_TO_43S	66	0.177212	Down	0.0144452	0.740055
PALOMERO_GSI_SENSITIVITY_DN	4	-0.0222332	Up	0.0144491	0.740055
GO_CORNIFICATION	70	0.128414	Up	0.0144895	0.740216
ZHANG_RESPONSE_TO_CANTHARIDIN_DN	69	0.0881107	Down	0.0145264	0.740216
GO_ARF_PROTEIN_SIGNAL_TRANSDUCTION	16	0.0419963	Up	0.0145778	0.740621
GO_L_LYSINE_TRANSMEMBRANE_TRANSPORT	4	0.0809787	Up	0.0146792	0.740621
GO_L_LYSINE_TRANSMEMBRANE_TRANSPORTER_ACTIVITY	4	0.0809787	Up	0.0146792	0.740621
GO_TERMINATION_OF_RNA_POLYMERASE_I_TRANSCRIPTION	38	0.0261954	Down	0.0146826	0.740621
REACTOME_TFAP2_AP_2_FAMILY_REGULATES_TRANSCRIPTION_OF_CELL_CYCLE_FACTORS	5	-0.0794313	Up	0.0148089	0.742892
GARGALOVIC_RESPONSE_TO_OXIDIZED_PHOSPHOLIPIDS_BLACK_UP	33	0.0781384	Up	0.0148239	0.742892
GO_NEGATIVE_REGULATION_OF_ASTROCYTE_DIFFERENTIATION	9	0.00566365	Up	0.0148392	0.742892
GO_FEMALE_PRONUCLEUS	7	0.0569412	Up	0.0148888	0.743033
GO_RIBOSOMAL_SMALL_SUBUNIT_ASSEMBLY	20	0.185051	Down	0.0149165	0.743033
GO_ACYLGLYCEROL_HOMEOSTASIS	17	0.0316678	Up	0.015025	0.745659
GO_SECONDARY_LYSOSOME	13	0.0618499	Down	0.0150438	0.745659
CHICAS_RB1_TARGETS_LOW_SERUM	88	0.0422347	Down	0.0150898	0.746084
GO_POSITIVE_REGULATION_OF_T_CELL_DIFFERENTIATION_IN_THYMUS	7	0.0983832	Down	0.0151723	0.746687
REACTOME_TRANSPORT_OF_CONNEXONS_TO_THE_PLASMA_MEMBRANE	12	0.329516	Down	0.0151767	0.746687
GO_LIGASE_ACTIVITY_FORMING_CARBON_OXYGEN_BONDS	24	0.0328922	Down	0.0153874	0.753518
HP_ELEVATED_CIRCULATING_FOLLICLE_STIMULATING_HORMONE_LEVEL	17	0.0206943	Down	0.015391	0.753518
REACTOME_GAP_JUNCTION_ASSEMBLY	21	0.187972	Down	0.0155456	0.758642
GO_COMMON_MYELOID_PROGENITOR_CELL_PROLIFERATION	5	0.160611	Down	0.0155716	0.758642
GO_NEGATIVE_REGULATION_OF_NIK_NF_KAPPAB_SIGNALING	16	0.010976	Up	0.0156972	0.761695
GO_NEGATIVE_REGULATION_OF_KERATINOCYTE_DIFFERENTIATION	3	0.22918	Down	0.0157106	0.761695
GO_RELAXATION_OF_CARDIAC_MUSCLE	12	0.0405725	Down	0.01584	0.764115
GO_REGULATION_OF_T_HELPER_CELL_DIFFERENTIATION	19	0.0570222	Up	0.0158632	0.764115
HP_HAMSTRING_CONTRACTURES	3	-0.027878	Up	0.0158752	0.764115
HP_SCALING_SKIN	21	0.0558315	Up	0.0159504	0.765267
NAKAYAMA_SOFT_TISSUE_TUMORS_PCA1_UP	51	0.00591412	Down	0.0159758	0.765267
REACTOME_RNA_POLYMERASE_I_TRANSCRIPTION_TERMINATION	38	0.0276607	Down	0.0160778	0.76831
HP_MACULAR_DYSTROPHY	10	0.0231308	Up	0.016202	0.770977
GO_INTRAMEMBRANE_LIPID_TRANSPORTER_ACTIVITY	15	-0.00581781	Up	0.0162108	0.770977
GO_REGULATION_OF_INTERLEUKIN_1_MEDIATED_SIGNALING_PATHWAY	5	0.0255793	Up	0.0162778	0.771803
BILANGES_RAPAMYCIN_SENSITIVE_VIA_TSC1_AND_TSC2	70	0.0911839	Down	0.0163054	0.771803
GO_PROGESTERONE_METABOLIC_PROCESS	12	0.0302041	Down	0.0163853	0.773748
LOPEZ_MESOTHELIOMA_SURVIVAL_WORST_VS_BEST_DN	6	0.0576868	Up	0.0164704	0.775936
GO_TRANSCRIPTION_INITIATION_FROM_RNA_POLYMERASE_I_PROMOTER	45	0.0188796	Down	0.0165642	0.778516
GO_REGULATION_OF_OOCYTE_MATURATION	6	0.0263654	Down	0.0166963	0.779613
HP_DISTAL_SYMPHALANGISM	3	-0.011811	Up	0.0167253	0.779613
LEIN_CEREBELLUM_MARKERS	58	0.0370576	Up	0.0169042	0.779613
HP_TONGUE_ATROPHY	10	0.0369704	Down	0.0169182	0.779613
SASAKI_TARGETS_OF_TP73_AND_TP63	13	0.058306	Down	0.0169938	0.779613
IWANAGA_E2F1_TARGETS_NOT_INDUCED_BY_SERUM	7	0.0432187	Up	0.0169991	0.779613
GO_MEIOTIC_CELL_CYCLE_PHASE_TRANSITION	6	0.0528472	Up	0.0169999	0.779613
REACTOME_EUKARYOTIC_TRANSLATION_INITIATION	124	0.242705	Down	0.0170186	0.779613
LE_SKI_TARGETS_DN	6	0.0686356	Up	0.0170434	0.779613
JEON_SMAD6_TARGETS_DN	16	0.0563996	Up	0.0170594	0.779613
GO_PHOSPHATIDYLINOSITOL_3_KINASE_REGULATORY_SUBUNIT_BINDING	8	0.083327	Up	0.0170976	0.779613
TAVOR_CEBPA_TARGETS_DN	23	0.00501815	Down	0.0171568	0.779613
GO_NEGATIVE_REGULATION_OF_MESODERM_DEVELOPMENT	4	-0.0916039	Down	0.0171651	0.779613
GO_CXCR_CHEMOKINE_RECEPTOR_BINDING	9	0.0690361	Up	0.0172028	0.779613
REACTOME_PURINE_CATABOLISM	17	0.0629441	Down	0.0172176	0.779613
HP_ABNORMAL_FACTOR_IX_ACTIVITY	4	0.0140093	Down	0.0172642	0.779613
GO_VIRAL_TRANSLATIONAL_TERMINATION_REINITIATION	5	0.121706	Down	0.0172657	0.779613
GO_ICOSATETRAENOIC_ACID_BINDING	5	0.121922	Up	0.0172912	0.779613
GO_MITOCHONDRIAL_PROTEIN_COMPLEX	268	0.0546007	Down	0.0173545	0.779613
VARELA_ZMPSTE24_TARGETS_UP	39	0.0528928	Up	0.0173681	0.779613
REACTOME_SURFACTANT_METABOLISM	14	0.0124687	Down	0.0174304	0.780656
REACTOME_RNA_POLYMERASE_III_TRANSCRIPTION_TERMINATION	23	0.057145	Down	0.0174772	0.780999
HP_DIAPHYSEAL_SCLEROSIS	6	0.0337959	Up	0.0175301	0.781617
GO_NEURAL_CREST_FORMATION	10	0.0372432	Down	0.0176079	0.783336
REACTOME_POLO_LIKE_KINASE_MEDIATED_EVENTS	16	0.0228962	Up	0.0176506	0.783491
WP_HIPPOYAP_SIGNALING_PATHWAY	22	0.0452392	Up	0.0177313	0.785327
GO_GLUCOCORTICOID_RECEPTOR_BINDING	14	0.0426996	Down	0.0178725	0.789832
HP_ABNORMALLY_LOW_PITCHED_VOICE	13	0.0675132	Up	0.0179585	0.791879
GO_TRNA_MODIFICATION	86	0.0302203	Down	0.0181573	0.798883
KIM_GERMINAL_CENTER_T_HELPER_DN	11	0.065901	Up	0.0182966	0.799083
GO_PWP2P_CONTAINING_SUBCOMPLEX_OF_90S_PRERIBOSOME	6	0.0201319	Down	0.0183121	0.799083
GO_EKC_KEOPS_COMPLEX	7	-0.0378931	Down	0.0183226	0.799083
GO_TRNA_CYTOSINE_METHYLTRANSFERASE_ACTIVITY	9	0.00240544	Down	0.0183232	0.799083
HP_ABNORMAL_ERYTHROCYTE_ENZYME_LEVEL	4	0.204197	Down	0.0183619	0.799083
GO_R2TP_COMPLEX	5	-0.0957252	Down	0.0184405	0.800707
REACTOME_KERATINIZATION	70	0.12311	Up	0.0184874	0.800707
HP_IMPAIRED_DISTAL_TACTILE_SENSATION	4	0.00923702	Down	0.0185807	0.800707
HP_PANCREATIC_ENDOCRINE_TUMOR	7	0.100718	Up	0.0186324	0.800707
HP_PARATHYROID_HYPERPLASIA	7	0.100718	Up	0.0186324	0.800707
HP_INCISOR_MACRODONTIA	8	0.00788882	Down	0.0186397	0.800707
GO_RNA_METHYLTRANSFERASE_ACTIVITY	68	0.0322128	Down	0.0187489	0.803345
AMUNDSON_DNA_DAMAGE_RESPONSE_TP53	15	0.0706793	Up	0.0187816	0.803345
GO_HISTONE_H4_R3_METHYLATION	6	0.0172062	Down	0.0188905	0.806278
HP_DECREASED_CIRCULATING_TOTAL_IGM	17	0.020261	Down	0.0191284	0.814691
LOPEZ_EPITHELIOID_MESOTHELIOMA	15	0.0489178	Up	0.0192775	0.817597
KRISHNAN_FURIN_TARGETS_UP	6	0.0699053	Down	0.0193967	0.817597
REACTOME_ACTIVATED_NTRK2_SIGNALS_THROUGH_CDK5	5	0.00808531	Up	0.0194211	0.817597
HP_REDUCED_ANTITHROMBIN_III_ACTIVITY	10	0.0166479	Down	0.0194684	0.817597
GO_UBIQUITIN_PROTEIN_TRANSFERASE_INHIBITOR_ACTIVITY	6	0.170244	Down	0.0194794	0.817597
GO_REGULATION_OF_MITOCHONDRIAL_GENE_EXPRESSION	30	0.0429639	Down	0.0194878	0.817597
REACTOME_VITAMINS	4	0.00992315	Up	0.0195108	0.817597
GO_MEMBRANOUS_SEPTUM_MORPHOGENESIS	9	0.0691588	Up	0.0195294	0.817597
REACTOME_FORMATION_OF_TUBULIN_FOLDING_INTERMEDIATES_BY_CCT_TRIC	19	0.166766	Down	0.019565	0.817597
LEE_METASTASIS_AND_RNA_PROCESSING_UP	17	0.0429641	Down	0.0196341	0.817905
GO_ACTIVIN_RECEPTOR_ACTIVITY_TYPE_I	4	0.0229311	Up	0.0196815	0.817905
GO_POSITIVE_REGULATION_OF_GASTRULATION	5	0.0542709	Down	0.0197169	0.817905
YANAGISAWA_LUNG_CANCER_RECURRENCE	7	0.0998106	Down	0.0197362	0.817905
GO_DNA_PACKAGING_COMPLEX	18	0.0434891	Up	0.0198218	0.819753
STOSSI_RESPONSE_TO_ESTRADIOL	30	0.011096	Down	0.0199219	0.82219
GO_CELLULAR_RESPONSE_TO_NITRIC_OXIDE	11	0.0288158	Up	0.0199656	0.822294
KEGG_PYRIMIDINE_METABOLISM	96	0.0335559	Down	0.020012	0.822508
MARTIN_NFKB_TARGETS_UP	28	0.0019386	Up	0.0202432	0.828472
GO_VENTRICULAR_COMPACT_MYOCARDIUM_MORPHOGENESIS	6	0.0476438	Up	0.0202495	0.828472
PEREZ_TP63_TARGETS	295	0.0502884	Up	0.0203168	0.828472
GO_REGULATION_OF_MIDBRAIN_DOPAMINERGIC_NEURON_DIFFERENTIATION	4	0.0410126	Down	0.020323	0.828472
TONKS_TARGETS_OF_RUNX1_RUNX1T1_FUSION_SUSTAINED_IN_MONOCYTE_DN	3	-0.0355962	Down	0.0204149	0.829506
HP_RETINAL_FOLD	4	0.0745124	Up	0.0204314	0.829506
GO_KETOSTEROID_MONOOXYGENASE_ACTIVITY	3	0.234371	Down	0.0205984	0.832951
GO_NEGATIVE_REGULATION_OF_HAIR_FOLLICLE_DEVELOPMENT	4	0.00526298	Up	0.0206497	0.832951
GO_NEURAL_PLATE_MORPHOGENESIS	5	0.108179	Up	0.0207306	0.832951
BROWN_MYELOID_CELL_DEVELOPMENT_DN	108	0.0365914	Down	0.0207505	0.832951
GO_POSITIVE_REGULATION_OF_T_HELPER_2_CELL_DIFFERENTIATION	5	-0.068937	Up	0.0209049	0.832951
GO_IMP_BIOSYNTHETIC_PROCESS	10	0.0472662	Down	0.0209556	0.832951
XU_HGF_TARGETS_REPRESSED_BY_AKT1_UP	10	0.0483939	Down	0.0209589	0.832951
GO_REGULATION_OF_RESPONSE_TO_DRUG	4	0.0421297	Down	0.0209863	0.832951
GO_L_ARGININE_TRANSMEMBRANE_TRANSPORT	4	0.0383635	Up	0.0209911	0.832951
BLANCO_MELO_SARS_COV_1_INFECTION_MCR5_CELLS_DN	3	-0.200793	Down	0.0210729	0.832951
GO_FLIPPASE_ACTIVITY	3	0.325868	Up	0.0212075	0.832951
RICKMAN_HEAD_AND_NECK_CANCER_E	67	0.0244291	Up	0.0212142	0.832951
DEMAGALHAES_AGING_UP	42	0.0648034	Down	0.0212334	0.832951
REACTOME_SODIUM_COUPLED_PHOSPHATE_COTRANSPORTERS	3	0.0469231	Down	0.0213124	0.832951
BRACHAT_RESPONSE_TO_METHOTREXATE_UP	19	0.0872157	Up	0.0213277	0.832951
KEGG_AMINOACYL_TRNA_BIOSYNTHESIS	24	0.0161492	Down	0.0213291	0.832951
GO_MITOCHONDRIAL_TRNA_METHYLATION	5	0.0158972	Down	0.0213634	0.832951
ST_GA13_PATHWAY	37	0.0280871	Up	0.0213788	0.832951
REACTOME_FORMATION_OF_THE_CORNIFIED_ENVELOPE	69	0.126117	Up	0.0214022	0.832951
GO_ANTERIOR_COMMISSURE_MORPHOGENESIS	3	0.167869	Up	0.0214066	0.832951
BIOCARTA_MTA3_PATHWAY	15	0.123195	Down	0.0214416	0.832951
GO_CYTOCHROME_COMPLEX_ASSEMBLY	37	0.0374337	Down	0.0214527	0.832951
BIOCARTA_ACH_PATHWAY	8	-0.00518206	Up	0.0214753	0.832951
GO_HEART_TRABECULA_MORPHOGENESIS	26	0.0815358	Up	0.0215417	0.833906
BILANGES_SERUM_AND_RAPAMYCIN_SENSITIVE_GENES	70	0.254161	Down	0.0218311	0.843474
GO_CYTOSOLIC_RIBOSOME	110	0.266294	Down	0.0219228	0.844118
HP_GENERALIZED_HYPERREFLEXIA	10	0.0649937	Down	0.0219323	0.844118
GO_CARDIOLIPIN_METABOLIC_PROCESS	17	0.0207417	Down	0.0220196	0.845848
HOLLEMAN_ASPARAGINASE_RESISTANCE_ALL_UP	25	0.0460081	Down	0.0221958	0.850982
BILANGES_SERUM_SENSITIVE_VIA_TSC1	13	0.0228174	Down	0.0222568	0.851684
GO_POSITIVE_REGULATION_OF_ANOIKIS	6	0.0451372	Down	0.0223081	0.852017
HP_THICKENED_HELICES	36	0.0281624	Up	0.0223662	0.85217
KOBAYASHI_EGFR_SIGNALING_6HR_DN	19	0.0890309	Down	0.0224787	0.85217
BHAT_ESR1_TARGETS_NOT_VIA_AKT1_DN	83	0.0506961	Up	0.0224818	0.85217
SEKI_INFLAMMATORY_RESPONSE_LPS_UP	64	0.0213993	Up	0.0225955	0.85217
GO_SEQUESTERING_OF_IRON_ION	4	0.262522	Down	0.0226195	0.85217
ONGUSAHA_BRCA1_TARGETS_DN	10	0.0379905	Up	0.0226502	0.85217
GO_EUKARYOTIC_48S_PREINITIATION_COMPLEX	15	0.0541439	Down	0.0226783	0.85217
GO_INTERSTITIAL_MATRIX	8	0.0383015	Up	0.0226822	0.85217
GO_DIAPEDESIS	5	0.00394089	Up	0.0227182	0.85217
WP_INTERACTOME_OF_POLYCOMB_REPRESSIVE_COMPLEX_2_PRC2	16	0.0695491	Up	0.0227388	0.85217
GO_NEGATIVE_REGULATION_OF_LENS_FIBER_CELL_DIFFERENTIATION	5	-0.0860451	Down	0.0228589	0.853447
BIOCARTA_P53_PATHWAY	16	0.0277797	Up	0.0228638	0.853447
LIM_MAMMARY_LUMINAL_PROGENITOR_UP	42	0.0128723	Up	0.022901	0.853447
GO_RIBONUCLEASE_P_COMPLEX	16	0.0534887	Down	0.0230922	0.853883
GO_KERATINIZATION	79	0.111627	Up	0.02313	0.853883
REACTOME_PI_METABOLISM	75	0.0349154	Up	0.023149	0.853883
HP_ADRENOCORTICAL_ADENOMA	6	0.195666	Up	0.0232615	0.853883
GO_ESTABLISHMENT_OF_ENDOTHELIAL_BLOOD_BRAIN_BARRIER	4	0.14961	Down	0.0232654	0.853883
PACHER_TARGETS_OF_IGF1_AND_IGF2_UP	29	0.0277604	Up	0.0233064	0.853883
HP_DIFFUSE_MESANGIAL_SCLEROSIS	11	0.0165519	Down	0.0233082	0.853883
GO_ACTIN_FILAMENT_BASED_TRANSPORT	15	0.0200908	Up	0.0233662	0.853883
REACTOME_SELENOAMINO_ACID_METABOLISM	111	0.252213	Down	0.0234369	0.853883
REACTOME_B_WICH_COMPLEX_POSITIVELY_REGULATES_RRNA_EXPRESSION	33	0.0356296	Down	0.0235658	0.853883
HP_OPTIC_NERVE_COMPRESSION	7	-0.00607215	Up	0.0235884	0.853883
GO_CELLULAR_RESPONSE_TO_X_RAY	10	0.0100493	Down	0.0236012	0.853883
GHANDHI_BYSTANDER_IRRADIATION_DN	10	0.00189247	Up	0.0236053	0.853883
REACTOME_EUKARYOTIC_TRANSLATION_ELONGATION	98	0.337182	Down	0.0236666	0.853883
GO_CANONICAL_WNT_SIGNALING_PATHWAY_INVOLVED_IN_HEART_DEVELOPMENT	3	-0.118556	Down	0.0236888	0.853883
HP_NEOPLASM_OF_THE_THYMUS	8	0.0978409	Up	0.0237171	0.853883
HOLLERN_EMT_BREAST_TUMOR_DN	125	0.07353	Up	0.023833	0.853883
GO_RENAL_VESICLE_DEVELOPMENT	15	-0.00976718	Down	0.0238457	0.853883
SCHAEFFER_PROSTATE_DEVELOPMENT_AND_CANCER_BOX5_DN	6	0.0799365	Down	0.0239078	0.853883
GO_REGULATION_OF_MUCUS_SECRETION	6	0.0127516	Down	0.0239921	0.853883
GO_MITOCHONDRIAL_TRNA_PROCESSING	13	0.0733814	Down	0.0240325	0.853883
HP_CONFETTI_LIKE_HYPOPIGMENTED_MACULES	8	0.0548444	Up	0.0240445	0.853883
GO_POSITIVE_REGULATION_OF_EPITHELIAL_CELL_PROLIFERATION_INVOLVED_IN_WOUND_HEALING	4	0.350065	Up	0.0240581	0.853883
LY_AGING_PREMATURE_DN	27	0.0147387	Up	0.0241045	0.853883
SPIRA_SMOKERS_LUNG_CANCER_DN	15	-0.0022194	Up	0.0241409	0.853883
GO_EXTRINSIC_COMPONENT_OF_POSTSYNAPTIC_MEMBRANE	7	0.0233171	Up	0.0241419	0.853883
ONO_FOXP3_TARGETS_UP	14	0.00713101	Down	0.0241651	0.853883
GEISS_RESPONSE_TO_DSRNA_DN	13	0.0192371	Down	0.0242046	0.853883
GO_TRANSFERASE_ACTIVITY_TRANSFERRING_ALKYL_OR_ARYL_OTHER_THAN_METHYL_GROUPS	45	0.0396516	Down	0.0242114	0.853883
GO_POSITIVE_REGULATION_OF_T_HELPER_1_TYPE_IMMUNE_RESPONSE	11	0.0401249	Up	0.0242124	0.853883
REACTOME_AGGREPHAGY	32	0.101318	Down	0.0242379	0.853883
GO_VASODILATION	21	0.023559	Down	0.0243411	0.855452
LIM_MAMMARY_LUMINAL_MATURE_UP	98	0.0266446	Up	0.0243961	0.855452
GO_TIM23_MITOCHONDRIAL_IMPORT_INNER_MEMBRANE_TRANSLOCASE_COMPLEX	15	0.111328	Down	0.0244109	0.855452
GO_DE_NOVO_IMP_BIOSYNTHETIC_PROCESS	7	0.0627841	Down	0.0244833	0.855459
GO_XENOBIOTIC_CATABOLIC_PROCESS	8	-0.0587587	Down	0.0244967	0.855459
HP_SECONDARY_AMENORRHEA	37	0.0542597	Down	0.0246312	0.858652
GO_ENDOTHELIAL_CELL_MORPHOGENESIS	10	0.0643439	Up	0.0247124	0.859983
GO_REGULATION_OF_INSULIN_LIKE_GROWTH_FACTOR_RECEPTOR_SIGNALING_PATHWAY	12	0.0314724	Up	0.0247695	0.860471
GO_LABYRINTHINE_LAYER_MORPHOGENESIS	16	0.12195	Up	0.0249032	0.86116
HP_APLASIA_HYPOPLASIA_OF_THE_PROXIMAL_PHALANX_OF_THE_THUMB	3	0.0549944	Up	0.0249216	0.86116
KALMA_E2F1_TARGETS	11	0.00669616	Up	0.0249484	0.86116
GO_TRNA_5_LEADER_REMOVAL	16	0.0198794	Down	0.0249618	0.86116
KOMMAGANI_TP63_GAMMA_TARGETS	9	0.119711	Up	0.0251746	0.863617
HP_LOWER_EYELID_COLOBOMA	5	0.0334942	Down	0.0251762	0.863617
GO_CALCIUM_CHANNEL_INHIBITOR_ACTIVITY	9	0.0934422	Down	0.0251897	0.863617
HP_ADIPOSE_TISSUE_LOSS	26	0.0242104	Down	0.0252059	0.863617
GO_LARGE_RIBOSOMAL_SUBUNIT_RRNA_BINDING	5	0.116868	Down	0.0253242	0.864925
CHANG_POU5F1_TARGETS_UP	11	0.015787	Up	0.0253524	0.864925
GO_GDP_MANNOSE_METABOLIC_PROCESS	8	0.0573352	Down	0.025374	0.864925
VANDESLUIS_COMMD1_TARGETS_GROUP_3_DN	21	0.0227838	Down	0.0254828	0.865181
GO_NEUTROPHIL_CLEARANCE	3	0.120476	Up	0.0254901	0.865181
GO_POSITIVE_REGULATION_OF_SEQUESTERING_OF_TRIGLYCERIDE	5	-0.00579211	Up	0.0255115	0.865181
GO_POSITIVE_REGULATION_OF_SIGNAL_TRANSDUCTION_BY_P53_CLASS_MEDIATOR	21	0.0595108	Down	0.0255617	0.865417
GO_RAGULATOR_COMPLEX	6	0.0768416	Down	0.0256067	0.865471
HP_ABNORMAL_PROXIMAL_PHALANX_MORPHOLOGY_OF_THE_HAND	16	0.0417327	Up	0.0259174	0.872945
GO_REGULATION_OF_MULTI_ORGANISM_PROCESS	43	0.03109	Down	0.02601	0.872945
REACTOME_FORMATION_OF_TC_NER_PRE_INCISION_COMPLEX	59	0.0305085	Down	0.0260185	0.872945
GO_ANTERIOR_HEAD_DEVELOPMENT	4	0.0845438	Down	0.0260681	0.872945
HP_MULTIPLE_SMALL_MEDULLARY_RENAL_CYSTS	5	0.0610285	Down	0.026099	0.872945
HP_ABNORMALITY_OF_EPIDERMAL_MORPHOLOGY	57	0.0589326	Up	0.0261114	0.872945
SIMBULAN_UV_RESPONSE_NORMAL_UP	9	-0.0180866	Up	0.0261337	0.872945
GO_AXIS_ELONGATION	22	0.020532	Down	0.0262148	0.874193
GO_HEMOGLOBIN_BIOSYNTHETIC_PROCESS	7	0.0541569	Down	0.026279	0.874871
GO_ACETYLCHOLINE_BINDING	4	0.0110689	Up	0.0263429	0.875538
GO_PURINE_NUCLEOSIDE_CATABOLIC_PROCESS	7	0.023464	Down	0.0264209	0.876318
KEGG_RIBOSOME	92	0.343139	Down	0.026454	0.876318
REACTOME_SNRNP_ASSEMBLY	55	0.0325152	Down	0.0265776	0.878951
GO_NEGATIVE_REGULATION_OF_INTRACELLULAR_ESTROGEN_RECEPTOR_SIGNALING_PATHWAY	11	0.03483	Down	0.0267007	0.879791
ELVIDGE_HIF1A_TARGETS_UP	64	0.0592018	Down	0.0267117	0.879791
DACOSTA_UV_RESPONSE_VIA_ERCC3_XPCS_UP	24	0.00880053	Down	0.026741	0.879791
LANDEMAINE_LUNG_METASTASIS	18	0.0194601	Up	0.0268364	0.879791
HP_CHYLOTHORAX	8	0.0144188	Up	0.0269107	0.879791
KASLER_HDAC7_TARGETS_2_DN	26	0.0302806	Up	0.0269172	0.879791
REACTOME_SRP_DEPENDENT_COTRANSLATIONAL_PROTEIN_TARGETING_TO_MEMBRANE	117	0.255686	Down	0.0269474	0.879791
GO_ATRIOVENTRICULAR_VALVE_DEVELOPMENT	21	0.0988955	Up	0.0270838	0.879791
GO_REGULATION_OF_T_HELPER_1_CELL_CYTOKINE_PRODUCTION	4	-0.0684262	Up	0.027109	0.879791
GO_NEGATIVE_REGULATION_OF_TUBULIN_DEACETYLATION	4	0.0470093	Up	0.0271271	0.879791
GO_ARGININE_TRANSMEMBRANE_TRANSPORT	5	0.0765569	Up	0.0271315	0.879791
GO_ARGININE_TRANSMEMBRANE_TRANSPORTER_ACTIVITY	5	0.0765569	Up	0.0271315	0.879791
GO_SODIUM_ION_IMPORT_ACROSS_PLASMA_MEMBRANE	13	0.0413287	Up	0.0271997	0.880574
GO_PHOSPHATIDYLINOSITOL_3_4_5_TRISPHOSPHATE_BINDING	32	0.0404104	Up	0.027304	0.882521
KEGG_PORPHYRIN_AND_CHLOROPHYLL_METABOLISM	24	0.0195996	Down	0.0275894	0.88478
HP_ANOSMIA	22	0.0120691	Down	0.0275957	0.88478
REACTOME_MRNA_SPLICING_MINOR_PATHWAY	55	0.0552265	Down	0.0276482	0.88478
LUI_TARGETS_OF_PAX8_PPARG_FUSION	37	0.120552	Down	0.0276682	0.88478
RODRIGUES_NTN1_AND_DCC_TARGETS	27	0.0481055	Down	0.0276878	0.88478
KONG_E2F3_TARGETS	86	0.0443355	Up	0.0277218	0.88478
GO_CYTOPLASMIC_TRANSLATION	99	0.106552	Down	0.0277455	0.88478
HP_DEEP_SET_NAILS	5	-0.0313981	Up	0.027754	0.88478
PEDERSEN_METASTASIS_BY_ERBB2_ISOFORM_1	42	0.0379146	Down	0.0277726	0.88478
REACTOME_TRNA_PROCESSING_IN_THE_NUCLEUS	62	0.0275458	Down	0.0279146	0.886547
REACTOME_RRNA_PROCESSING_IN_THE_MITOCHONDRION	11	0.0111627	Down	0.0279494	0.886547
BIOCARTA_CARDIACEGF_PATHWAY	12	0.0476301	Down	0.0280014	0.886547
GO_NUCLEAR_PORE_CENTRAL_TRANSPORT_CHANNEL	8	0.0152606	Down	0.0280496	0.886547
WP_REGULATION_OF_MICROTUBULE_CYTOSKELETON	41	0.0481435	Up	0.0280499	0.886547
GO_REGULATION_OF_BILE_ACID_METABOLIC_PROCESS	6	0.0424115	Up	0.0281447	0.887044
REACTOME_P2Y_RECEPTORS	5	-0.0363344	Down	0.0281956	0.887044
XU_RESPONSE_TO_TRETINOIN_AND_NSC682994_DN	14	0.0343818	Down	0.0281989	0.887044
GO_CHEMOKINE_RECEPTOR_BINDING	22	0.0353624	Up	0.0283335	0.888754
GO_INTRINSIC_COMPONENT_OF_MITOCHONDRIAL_INNER_MEMBRANE	51	0.0339386	Down	0.0284599	0.888754
ELVIDGE_HIF1A_AND_HIF2A_TARGETS_UP	39	0.055224	Down	0.0284782	0.888754
WHITFIELD_CELL_CYCLE_LITERATURE	44	0.0778977	Up	0.0284821	0.888754
HP_IMPAIRED_TEMPERATURE_SENSATION	7	0.0274202	Up	0.0285199	0.888754
REACTOME_RESPONSE_OF_EIF2AK4_GCN2_TO_AMINO_ACID_DEFICIENCY	106	0.286086	Down	0.0285202	0.888754
GOERING_BLOOD_HDL_CHOLESTEROL_QTL_CIS	5	0.207579	Down	0.0285658	0.888788
GO_NUCLEOSIDE_MONOPHOSPHATE_CATABOLIC_PROCESS	4	0.037302	Down	0.0287694	0.8923
WP_CYTOPLASMIC_RIBOSOMAL_PROTEINS	94	0.323105	Down	0.0287846	0.8923
GO_NUCLEAR_EXOSOME_RNASE_COMPLEX	16	0.039009	Down	0.0288127	0.8923
GO_CELLULAR_RESPONSE_TO_EXOGENOUS_DSRNA	20	-0.0164047	Down	0.0289811	0.894214
REACTOME_INTRINSIC_PATHWAY_OF_FIBRIN_CLOT_FORMATION	7	0.0604718	Down	0.0290005	0.894214
GO_POSITIVE_REGULATION_OF_CORE_PROMOTER_BINDING	4	0.0885841	Down	0.0290088	0.894214
GO_TRANSCRIPTION_BY_RNA_POLYMERASE_I	69	0.0226671	Down	0.0290552	0.894265
GO_REGULATION_OF_ANION_CHANNEL_ACTIVITY	6	0.170234	Up	0.0291864	0.895744
GO_POSITIVE_REGULATION_OF_TRANSCRIPTION_FROM_RNA_POLYMERASE_II_PROMOTER_IN_RESPONSE_TO_OXIDATIVE_STRESS	4	0.125618	Up	0.0291929	0.895744
HP_CRANIOFACIAL_DYSOSTOSIS	8	0.0206686	Down	0.0294739	0.902977
HP_ABSENCE_OF_SUBCUTANEOUS_FAT	11	0.0657694	Down	0.029757	0.906812
HP_MULTIPLE_LIPOMAS	29	0.0221345	Up	0.0297881	0.906812
GRAHAM_CML_QUIESCENT_VS_CML_DIVIDING_DN	6	0.0448575	Up	0.0297882	0.906812
GO_FORMATION_OF_CYTOPLASMIC_TRANSLATION_INITIATION_COMPLEX	16	0.0655815	Down	0.0297954	0.906812
GO_ENUCLEATE_ERYTHROCYTE_DIFFERENTIATION	7	0.0173048	Up	0.029909	0.906812
MOOTHA_VOXPHOS	89	0.0715147	Down	0.0299135	0.906812
GO_SMN_COMPLEX	13	0.00624686	Down	0.0299172	0.906812
REICHERT_MITOSIS_LIN9_TARGETS	27	0.0870998	Up	0.0299622	0.906812
GO_TRANSFERASE_ACTIVITY_TRANSFERRING_ACYL_GROUPS_ACYL_GROUPS_CONVERTED_INTO_ALKYL_ON_TRANSFER	4	0.1052	Up	0.0300562	0.907476
TONKS_TARGETS_OF_RUNX1_RUNX1T1_FUSION_MONOCYTE_UP	195	0.0475699	Down	0.0300862	0.907476
GO_EMBRYONIC_CAMERA_TYPE_EYE_DEVELOPMENT	27	0.050677	Up	0.0301205	0.907476
GO_GENITALIA_MORPHOGENESIS	4	0.038874	Down	0.0301963	0.908223
REACTOME_SYNTHESIS_OF_PIPS_AT_THE_PLASMA_MEMBRANE	49	0.0454509	Up	0.0302863	0.908223
HP_EQUINOVARUS_DEFORMITY	6	0.0353298	Down	0.0303273	0.908223
GO_POSITIVE_REGULATION_OF_MITOCHONDRIAL_TRANSLATION	17	0.0677982	Down	0.030407	0.908223
GO_ADP_RIBOSE_DIPHOSPHATASE_ACTIVITY	5	-0.0164833	Down	0.030617	0.908223
GO_ATP_DEPENDENT_MICROTUBULE_MOTOR_ACTIVITY_PLUS_END_DIRECTED	11	0.117731	Up	0.0306381	0.908223
HP_CENTRAL_DIABETES_INSIPIDUS	4	-0.0423111	Down	0.0306566	0.908223
GO_BRANCH_ELONGATION_OF_AN_EPITHELIUM	15	0.0389133	Down	0.0306853	0.908223
HP_CHORIOCARCINOMA	4	-0.0340118	Up	0.0307205	0.908223
ZHOU_PANCREATIC_EXOCRINE_PROGENITOR	5	0.00390147	Down	0.0308125	0.908223
GO_BOX_H_ACA_TELOMERASE_RNP_COMPLEX	4	0.155603	Down	0.0308472	0.908223
GO_HIGH_DENSITY_LIPOPROTEIN_PARTICLE	13	0.00589272	Down	0.0308956	0.908223
GO_ALDITOL_NADPPLUS_1_OXIDOREDUCTASE_ACTIVITY	8	0.0871641	Down	0.0309434	0.908223
GO_NEGATIVE_REGULATION_OF_P38MAPK_CASCADE	5	0.129032	Up	0.0309476	0.908223
GO_CELL_FATE_COMMITMENT_INVOLVED_IN_FORMATION_OF_PRIMARY_GERM_LAYER	22	0.0294223	Down	0.0309829	0.908223
GO_CATALYTIC_ACTIVITY_ACTING_ON_RNA	370	0.0328174	Down	0.030993	0.908223
HP_RETINAL_PERFORATION	4	-0.0257828	Down	0.031022	0.908223
GO_REGULATION_OF_SOMATIC_STEM_CELL_POPULATION_MAINTENANCE	7	-0.000155987	Down	0.0310281	0.908223
HP_ABNORMALITY_OF_THE_PERITONEUM	24	5.55e-05	Up	0.0310349	0.908223
HE_PTEN_TARGETS_UP	16	0.0379599	Up	0.0310546	0.908223
GO_REGULATION_OF_MESODERM_DEVELOPMENT	9	-0.0130653	Down	0.0311665	0.908988
GO_RESPONSE_TO_STILBENOID	4	-0.124587	Down	0.0311718	0.908988
HP_APLASIA_HYPOPLASIA_OF_THE_OVARY	51	0.0160691	Down	0.0312778	0.91075
REACTOME_INFLUENZA_INFECTION	163	0.162122	Down	0.0313616	0.91186
NEWMAN_ERCC6_TARGETS_DN	27	0.0135944	Up	0.0315733	0.916683
NIKOLSKY_BREAST_CANCER_10Q22_AMPLICON	9	0.0202954	Down	0.0316857	0.918611
ISHIKAWA_STING_SIGNALING	8	-0.0315717	Up	0.0317555	0.9193
GO_MODULATION_OF_MICROTUBULE_CYTOSKELETON_INVOLVED_IN_CEREBRAL_CORTEX_RADIAL_GLIA_GUIDED_MIGRATION	5	-0.00736813	Up	0.0318823	0.920485
GO_CATECHOLAMINE_BINDING	4	0.0355554	Down	0.0318887	0.920485
REACTOME_NONSENSE_MEDIATED_DECAY_NMD_	120	0.233461	Down	0.0320553	0.923556
GO_NEGATIVE_REGULATION_OF_MEMBRANE_PERMEABILITY	7	0.0027602	Up	0.0320875	0.923556
GO_CYTOSOLIC_LARGE_RIBOSOMAL_SUBUNIT	55	0.359718	Down	0.0321365	0.923635
GO_GEMINI_OF_COILED_BODIES	14	0.000396553	Down	0.0323009	0.925963
GO_G1_TO_G0_TRANSITION	8	-0.0105684	Up	0.0323102	0.925963
GO_POSITIVE_REGULATION_OF_CAMP_MEDIATED_SIGNALING	8	-0.0112031	Down	0.0324597	0.928825
SCHAEFFER_PROSTATE_DEVELOPMENT_AND_CANCER_BOX3	5	0.107442	Down	0.0325137	0.928825
HP_HIATUS_HERNIA	23	0.0128306	Down	0.0325496	0.928825
HP_AQUEDUCTAL_STENOSIS	17	0.0126632	Down	0.0326605	0.929541
GO_POSITIVE_REGULATION_OF_BLOOD_BRAIN_BARRIER_PERMEABILITY	5	0.0268566	Up	0.0326677	0.929541
GO_THREONINE_TYPE_ENDOPEPTIDASE_ACTIVITY	21	0.0327508	Down	0.0327716	0.931169
GO_INTRACELLULAR_STEROL_TRANSPORT	20	0.0493536	Up	0.0328713	0.932676
GO_NEGATIVE_REGULATION_OF_UBIQUITIN_PROTEIN_LIGASE_ACTIVITY	8	0.114268	Down	0.0331235	0.936831
HP_MYOFIBRILLAR_MYOPATHY	9	-0.0165993	Up	0.0331477	0.936831
BIOCARTA_EPONFKB_PATHWAY	10	0.0155332	Up	0.033171	0.936831
GO_MITOCHONDRIAL_RESPIRATORY_CHAIN_COMPLEX_ASSEMBLY	105	0.0445357	Down	0.0332053	0.936831
GO_METANEPHRIC_TUBULE_FORMATION	4	-0.0186419	Down	0.0333476	0.939517
BIOCARTA_PLCE_PATHWAY	8	0.0342223	Down	0.0335995	0.943154
REACTOME_SODIUM_PROTON_EXCHANGERS	9	0.0130776	Up	0.033607	0.943154
GO_ORGANELLE_ENVELOPE_LUMEN	86	0.0451536	Down	0.0336638	0.943154
GO_PARATHYROID_GLAND_DEVELOPMENT	5	0.00886466	Up	0.0336655	0.943154
HOLLEMAN_DAUNORUBICIN_B_ALL_UP	9	0.0156251	Down	0.0337816	0.945079
GO_CATALYTIC_ACTIVITY_ACTING_ON_A_RRNA	23	0.0190492	Down	0.0339217	0.947673
REACTOME_REGULATION_OF_EXPRESSION_OF_SLITS_AND_ROBOS	170	0.165981	Down	0.0340641	0.950323
CHNG_MULTIPLE_MYELOMA_HYPERPLOID_UP	55	0.201236	Down	0.0341327	0.950909
YANAGIHARA_ESX1_TARGETS	26	0.0674091	Up	0.034211	0.951649
REACTOME_SIGNALING_BY_HIPPO	22	0.0703191	Up	0.0343327	0.951649
HP_SOCIAL_AND_OCCUPATIONAL_DETERIORATION	6	0.0870431	Up	0.0343382	0.951649
REACTOME_PURINE_RIBONUCLEOSIDE_MONOPHOSPHATE_BIOSYNTHESIS	11	0.033177	Down	0.0344178	0.951649
GO_PROTEIN_GLUTAMINE_GAMMA_GLUTAMYLTRANSFERASE_ACTIVITY	3	0.150377	Up	0.0344731	0.951649
HP_EEG_WITH_SPIKE_WAVE_COMPLEXES_3_5_HZ_	6	-0.01862	Down	0.0345665	0.951649
BURTON_ADIPOGENESIS_PEAK_AT_8HR	37	0.0556075	Down	0.0347203	0.951649
GO_REGULATION_OF_BILE_ACID_BIOSYNTHETIC_PROCESS	4	0.0757468	Up	0.0347662	0.951649
GO_RRNA_PSEUDOURIDINE_SYNTHESIS	10	0.124725	Down	0.0348064	0.951649
HP_PARTIAL_ALBINISM	6	0.0229658	Down	0.0348756	0.951649
REACTOME_CALCITONIN_LIKE_LIGAND_RECEPTORS	4	-0.0410261	Up	0.0349148	0.951649
GO_PURINE_NUCLEOSIDE_BIOSYNTHETIC_PROCESS	20	0.0683844	Down	0.034979	0.951649
SARTIPY_BLUNTED_BY_INSULIN_RESISTANCE_DN	17	0.0191398	Up	0.0350128	0.951649
GO_CYTOPLASMIC_TRANSLATIONAL_INITIATION	35	0.0886586	Down	0.0350781	0.951649
GO_ALPHA_BETA_T_CELL_ACTIVATION_INVOLVED_IN_IMMUNE_RESPONSE	38	0.0292414	Up	0.0352133	0.951649
FUNG_IL2_SIGNALING_1	8	0.142104	Down	0.035255	0.951649
GO_MITOCHONDRIAL_MATRIX	445	0.0371723	Down	0.0352665	0.951649
WP_FGF23_SIGNALLING_IN_HYPOPHOSPHATEMIC_RICKETS_AND_RELATED_DISORDERS	12	0.0707227	Up	0.0352932	0.951649
GO_HYDROGEN_SULFIDE_BIOSYNTHETIC_PROCESS	5	-0.0161352	Up	0.0353389	0.951649
HP_ABNORMALITY_OF_VENOUS_PHYSIOLOGY	5	0.141108	Up	0.0353915	0.951649
GO_NEGATIVE_REGULATION_OF_MESENCHYMAL_CELL_APOPTOTIC_PROCESS	5	0.116316	Down	0.0353999	0.951649
HP_ABNORMAL_CERVICAL_SPINE_MORPHOLOGY	10	0.0452184	Down	0.0354495	0.951649
GO_CYTOPLASMIC_SIDE_OF_ROUGH_ENDOPLASMIC_RETICULUM_MEMBRANE	5	0.128038	Down	0.035475	0.951649
GO_CONDENSED_NUCLEAR_CHROMOSOME_CENTROMERIC_REGION	28	0.0355874	Up	0.0354989	0.951649
REACTOME_RNA_POLYMERASE_III_TRANSCRIPTION_INITIATION_FROM_TYPE_1_PROMOTER	30	0.0398985	Down	0.0355395	0.951649
TUOMISTO_TUMOR_SUPPRESSION_BY_COL13A1_DN	11	0.0013793	Up	0.0355559	0.951649
TAKAO_RESPONSE_TO_UVB_RADIATION_UP	87	0.110379	Down	0.0355922	0.951649
REACTOME_ERKS_ARE_INACTIVATED	13	0.0767592	Down	0.0355928	0.951649
GO_T_HELPER_1_CELL_DIFFERENTIATION	14	0.0217333	Up	0.0356601	0.951649
HP_SHALLOW_ACETABULAR_FOSSAE	5	-0.0431248	Up	0.0356744	0.951649
REACTOME_ERYTHROPOIETIN_ACTIVATES_RAS	13	0.0319739	Up	0.0358218	0.951649
SCHMIDT_POR_TARGETS_IN_LIMB_BUD_UP	25	0.0914231	Up	0.0358228	0.951649
GO_VENTRICULAR_SEPTUM_DEVELOPMENT	62	0.0682662	Up	0.0358402	0.951649
GO_COTRANSLATIONAL_PROTEIN_TARGETING_TO_MEMBRANE	105	0.280472	Down	0.0358598	0.951649
GO_PLASMA_MEMBRANE_FUSION	8	-0.0228876	Down	0.0358728	0.951649
WP_TRANSCRIPTION_COFACTORS_SKI_AND_SKIL_PROTEIN_PARTNERS	17	0.0537017	Up	0.0358744	0.951649
GO_RESPONSE_TO_ZINC_ION	35	0.0529107	Down	0.0360127	0.952342
GO_VENTRICULAR_TRABECULA_MYOCARDIUM_MORPHOGENESIS	13	0.123995	Up	0.036089	0.952342
WP_PATHWAYS_OF_NUCLEIC_ACID_METABOLISM_AND_INNATE_IMMUNE_SENSING	14	-0.00545308	Down	0.0361629	0.952342
HP_METAPHYSEAL_STRIATIONS	6	0.0201201	Down	0.03617	0.952342
BRACHAT_RESPONSE_TO_CAMPTOTHECIN_UP	24	0.0815403	Up	0.036185	0.952342
GO_MRNA_5_UTR_BINDING	27	0.0512629	Down	0.0362354	0.952342
HP_ABNORMALITY_OF_THE_MIDDLE_PHALANGES_OF_THE_TOES	8	0.0596477	Up	0.0362609	0.952342
WP_OVERVIEW_OF_LEUKOCYTEINTRINSIC_HIPPO_PATHWAY_FUNCTIONS	29	0.0678876	Up	0.0363085	0.952342
GO_MITOTIC_SPINDLE_ASTRAL_MICROTUBULE	8	0.0473718	Up	0.0363555	0.952342
HP_EPISODIC_HYPERTENSION	6	0.00774134	Up	0.0364673	0.952342
GO_TYPE_I_PNEUMOCYTE_DIFFERENTIATION	5	0.0192441	Up	0.0366208	0.952342
GO_NEGATIVE_REGULATION_OF_TYPE_2_IMMUNE_RESPONSE	7	0.0541424	Up	0.0368347	0.952342
GO_PHOSPHATE_ION_BINDING	7	-0.0240326	Down	0.0368423	0.952342
GO_LIPID_TRANSLOCATION	38	0.00351629	Up	0.0368896	0.952342
HP_DELIRIUM	6	-0.0272549	Down	0.0369192	0.952342
HP_HYPOPIGMENTED_MACULE	11	0.0271542	Up	0.0369701	0.952342
GO_AMINOACYL_TRNA_SYNTHETASE_MULTIENZYME_COMPLEX	3	-0.042991	Down	0.0369932	0.952342
WP_ID_SIGNALING_PATHWAY	13	0.0371406	Up	0.0370313	0.952342
ZHANG_RESPONSE_TO_IKK_INHIBITOR_AND_TNF_UP	210	0.0459073	Up	0.0370678	0.952342
GO_SPHINGOLIPID_TRANSFER_ACTIVITY	7	0.128924	Up	0.037071	0.952342
GO_CYTOPLASMIC_SIDE_OF_ENDOPLASMIC_RETICULUM_MEMBRANE	14	0.0517065	Down	0.0371181	0.952342
GO_RENAL_WATER_TRANSPORT	4	0.0406437	Down	0.03716	0.952342
GO_PARALLEL_FIBER_TO_PURKINJE_CELL_SYNAPSE	7	-0.0126097	Up	0.0372354	0.952342
GO_T_HELPER_1_TYPE_IMMUNE_RESPONSE	30	0.0162379	Up	0.0372484	0.952342
GO_POSITIVE_REGULATION_OF_SYNAPTIC_TRANSMISSION_GABAERGIC	8	0.0359721	Up	0.0373109	0.952342
GO_POLYSOMAL_RIBOSOME	31	0.255589	Down	0.0373778	0.952342
GO_GATOR1_COMPLEX	6	-0.00373182	Down	0.0374286	0.952342
GO_REGULATION_OF_ISOTYPE_SWITCHING_TO_IGE_ISOTYPES	5	-0.0167463	Up	0.0374382	0.952342
REACTOME_CARBOXYTERMINAL_POST_TRANSLATIONAL_MODIFICATIONS_OF_TUBULIN	26	0.0937281	Down	0.037495	0.952342
GO_TRNA_ADENINE_METHYLTRANSFERASE_ACTIVITY	5	0.111652	Down	0.0374989	0.952342
HP_LIMITED_SHOULDER_MOVEMENT	4	-0.0710696	Up	0.0375256	0.952342
HP_11_PAIRS_OF_RIBS	24	0.0103499	Down	0.0375842	0.952342
HP_OXYCEPHALY	4	-0.00429907	Up	0.0376683	0.952342
CLIMENT_BREAST_CANCER_COPY_NUMBER_UP	17	0.0220941	Down	0.0376768	0.952342
CONRAD_STEM_CELL	29	0.00792902	Down	0.0377159	0.952342
GO_RRNA_METHYLATION	27	0.0121938	Down	0.0378259	0.952342
ST_INTERLEUKIN_4_PATHWAY	22	0.013413	Up	0.0378521	0.952342
HP_APLASIA_HYPOPLASIA_OF_THE_PANCREAS	11	-0.0104907	Up	0.0378823	0.952342
GO_CERAMIDE_1_PHOSPHATE_BINDING	7	0.115732	Up	0.0378941	0.952342
GO_WIDE_PORE_CHANNEL_ACTIVITY	17	0.0870216	Down	0.0378952	0.952342
GO_CELLULAR_RESPONSE_TO_NITROSATIVE_STRESS	5	0.0441704	Down	0.0378992	0.952342
SENESE_HDAC2_TARGETS_DN	93	0.0343297	Up	0.037903	0.952342
GO_REGULATION_OF_PROTEIN_KINASE_C_SIGNALING	14	0.0100612	Up	0.0379554	0.952462
GO_VIRAL_GENE_EXPRESSION	205	0.106422	Down	0.0380532	0.953718
HP_APLASIA_HYPOPLASIA_OF_THE_NASAL_SEPTUM	4	0.0541754	Up	0.0382511	0.955772
WP_IMATINIB_AND_CHRONIC_MYELOID_LEUKEMIA	13	0.0135866	Up	0.038453	0.955772
PID_AURORA_A_PATHWAY	30	0.0523352	Up	0.0384574	0.955772
REACTOME_PRC2_METHYLATES_HISTONES_AND_DNA	13	0.0290259	Up	0.0384871	0.955772
GO_U5_SNRNP	17	0.0547758	Down	0.0384955	0.955772
GO_POSITIVE_REGULATION_OF_GLIAL_CELL_MIGRATION	6	0.0208475	Up	0.0384991	0.955772
GO_POSITIVE_REGULATION_OF_ENDOTHELIAL_CELL_DEVELOPMENT	3	-0.0726112	Up	0.0385553	0.955772
WEBER_METHYLATED_HCP_IN_SPERM_DN	6	-0.0179373	Down	0.0386288	0.955772
GO_NEURAL_PLATE_REGIONALIZATION	6	0.0255343	Up	0.0386373	0.955772
GO_NEURAL_PLATE_ANTERIOR_POSTERIOR_REGIONALIZATION	5	0.0389682	Up	0.0386465	0.955772
GO_ENDODERM_FORMATION	41	0.0357953	Down	0.0387182	0.955772
GO_PROTEASOME_CORE_COMPLEX	21	0.0426438	Down	0.03873	0.955772
GO_GAMMA_CATENIN_BINDING	9	0.0514511	Up	0.0387634	0.955772
LY_AGING_OLD_DN	54	0.0482398	Up	0.0388575	0.955772
GO_NUCLEAR_TRANSCRIBED_MRNA_CATABOLIC_PROCESS_NONSENSE_MEDIATED_DECAY	130	0.191255	Down	0.0388841	0.955772
GO_PHOSPHOLIPID_TRANSPORTER_ACTIVITY	39	0.0289086	Up	0.0389008	0.955772
HP_VOLVULUS	10	0.0139884	Up	0.0390969	0.956632
GO_NEURAL_PLATE_PATTERN_SPECIFICATION	8	0.0116292	Up	0.0391121	0.956632
HOLLEMAN_VINCRISTINE_RESISTANCE_ALL_UP	26	0.0699749	Up	0.0391942	0.956632
GO_OLFACTORY_LOBE_DEVELOPMENT	18	0.0358471	Up	0.0393009	0.956632
WACKER_HYPOXIA_TARGETS_OF_VHL	11	0.0700655	Up	0.0393417	0.956632
FLOTHO_PEDIATRIC_ALL_THERAPY_RESPONSE_UP	53	0.087141	Down	0.0393799	0.956632
GO_RNA_METHYLATION	83	0.0328407	Down	0.0394347	0.956632
HINATA_NFKB_TARGETS_KERATINOCYTE_DN	23	0.0907524	Up	0.0395205	0.956632
GO_REGULATION_OF_TRANSLATION_IN_RESPONSE_TO_ENDOPLASMIC_RETICULUM_STRESS	10	0.122483	Up	0.0395467	0.956632
HP_PITUITARY_PROLACTIN_CELL_ADENOMA	7	0.154308	Up	0.0395966	0.956632
GO_NEGATIVE_REGULATION_OF_GLIAL_CELL_DIFFERENTIATION	16	0.0433741	Up	0.0396695	0.956632
GO_MIDBRAIN_DOPAMINERGIC_NEURON_DIFFERENTIATION	13	0.0229701	Down	0.0396733	0.956632
YIH_RESPONSE_TO_ARSENITE_C5	8	0.120014	Down	0.0397211	0.956632
MASRI_RESISTANCE_TO_TAMOXIFEN_AND_AROMATASE_INHIBITORS_DN	16	0.0596192	Down	0.039727	0.956632
BOSCO_EPITHELIAL_DIFFERENTIATION_MODULE	61	0.0615036	Up	0.0397539	0.956632
GO_TRACHEA_FORMATION	6	-0.0292652	Down	0.0398065	0.956632
HP_ABNORMAL_PANCREAS_SIZE	13	0.00244382	Up	0.0398324	0.956632
GO_RESPONSE_TO_GRANULOCYTE_MACROPHAGE_COLONY_STIMULATING_FACTOR	8	0.0432656	Up	0.0398355	0.956632
REACTOME_PTK6_REGULATES_PROTEINS_INVOLVED_IN_RNA_PROCESSING	4	-0.00164134	Down	0.0398457	0.956632
ZHOU_CELL_CYCLE_GENES_IN_IR_RESPONSE_24HR	124	0.0329186	Up	0.0401407	0.962557
GO_ORGAN_INDUCTION	12	0.0235468	Down	0.0402872	0.963543
GO_N_ACETYLLACTOSAMINE_SYNTHASE_ACTIVITY	5	0.136673	Up	0.0402974	0.963543
CROONQUIST_NRAS_SIGNALING_UP	22	0.0267821	Down	0.0403429	0.963543
KIM_PTEN_TARGETS_UP	17	0.0439716	Up	0.0404046	0.963543
GO_LIPID_TRANSFER_ACTIVITY	32	0.0412658	Up	0.040423	0.963543
HP_PSEUDOARTHROSIS	8	0.0704449	Down	0.0405148	0.964579
PETRETTO_HEART_MASS_QTL_CIS_DN	26	0.0343667	Down	0.0407881	0.969931
HP_STREAK_OVARY	14	0.0456143	Down	0.0408901	0.970026
GO_INNER_MITOCHONDRIAL_MEMBRANE_ORGANIZATION	53	0.0650176	Down	0.0409162	0.970026
GO_ANGIOTENSIN_ACTIVATED_SIGNALING_PATHWAY	9	-0.00374882	Up	0.0409378	0.970026
WONG_MITOCHONDRIA_GENE_MODULE	217	0.0520391	Down	0.0410303	0.970193
MANALO_HYPOXIA_DN	282	0.0363298	Down	0.0411437	0.970193
FARMER_BREAST_CANCER_CLUSTER_1	16	0.0177857	Down	0.0412225	0.970193
NADERI_BREAST_CANCER_PROGNOSIS_UP	43	0.03335	Up	0.0413746	0.970193
PARK_OSTEOBLAST_DIFFERENTIATION_BY_PHENYLAMIL_UP	11	0.0918682	Up	0.0414185	0.970193
WP_THE_ALTERNATIVE_PATHWAY_OF_FETAL_ANDROGEN_SYNTHESIS	5	0.212783	Down	0.0414488	0.970193
GO_LABYRINTHINE_LAYER_DEVELOPMENT	40	0.0909388	Up	0.0415014	0.970193
TAVOR_CEBPA_TARGETS_UP	43	0.0442048	Up	0.0415165	0.970193
GO_NUCLEOTIDYLTRANSFERASE_ACTIVITY	126	0.0328703	Down	0.0416523	0.970193
HP_DIAPHRAGMATIC_EVENTRATION	8	-0.00231683	Up	0.0416752	0.970193
GO_MACROMOLECULE_TRANSMEMBRANE_TRANSPORTER_ACTIVITY	20	0.0582272	Down	0.0417193	0.970193
ZHOU_CELL_CYCLE_GENES_IN_IR_RESPONSE_6HR	82	0.0342716	Up	0.0417893	0.970193
HP_RHIZOMELIC_ARM_SHORTENING	6	0.024946	Down	0.0418296	0.970193
GO_ESTABLISHMENT_OF_PROTEIN_LOCALIZATION_TO_ENDOPLASMIC_RETICULUM	119	0.241904	Down	0.0418708	0.970193
GO_ESTABLISHMENT_OF_PROTEIN_LOCALIZATION_TO_CHROMOSOME	23	0.0228357	Down	0.0418938	0.970193
STREICHER_LSM1_TARGETS_DN	17	0.0616523	Down	0.0419443	0.970193
HP_MICROGLOSSIA	14	0.0314196	Down	0.0419918	0.970193
GO_DORSAL_AORTA_MORPHOGENESIS	7	0.169645	Up	0.0420343	0.970193
GO_METANEPHRIC_NEPHRON_DEVELOPMENT	27	-0.000554617	Down	0.0420608	0.970193
TOOKER_GEMCITABINE_RESISTANCE_UP	79	0.0515787	Down	0.0421544	0.970193
GO_MITOCHONDRIAL_RNA_METABOLIC_PROCESS	45	0.0554709	Down	0.0421651	0.970193
AIGNER_ZEB1_TARGETS	37	0.108878	Up	0.0421814	0.970193
HP_ABNORMALITY_OF_SECONDARY_SEXUAL_HAIR	42	0.0372782	Down	0.0422023	0.970193
GO_PHOSPHATIDYLINOSITOL_3_4_BISPHOSPHATE_5_KINASE_ACTIVITY	4	0.137867	Up	0.0422057	0.970193
GO_PHOSPHATIDYLINOSITOL_BISPHOSPHATE_KINASE_ACTIVITY	4	0.137867	Up	0.0422057	0.970193
GO_RNA_MODIFICATION	159	0.0270326	Down	0.0423509	0.970193
GO_G_PROTEIN_COUPLED_RECEPTOR_SIGNALING_PATHWAY_INVOLVED_IN_HEART_PROCESS	8	0.0640413	Down	0.0423683	0.970193
GO_MAMMARY_GLAND_ALVEOLUS_DEVELOPMENT	17	0.0114846	Down	0.0424052	0.970193
HP_ABSENT_OR_MINIMALLY_OSSIFIED_VERTEBRAL_BODIES	10	0.0678352	Down	0.0424498	0.970193
GO_NATA_COMPLEX	4	0.00218129	Down	0.0424576	0.970193
HP_ABNORMALITY_OF_VITAMIN_D_METABOLISM	13	0.0326932	Down	0.0424605	0.970193
HP_EMG_AXONAL_ABNORMALITY	3	-0.191787	Up	0.0424991	0.970193
HP_APLASIA_HYPOPLASIA_OF_THE_PHALANGES_OF_THE_THUMB	26	0.0302743	Up	0.0426226	0.971654
GO_OLIGOPEPTIDE_TRANSMEMBRANE_TRANSPORT	9	-0.0156525	Up	0.0426603	0.971654
REACTOME_RUNX3_REGULATES_CDKN1A_TRANSCRIPTION	7	0.0323532	Up	0.0428096	0.972307
GO_RNA_PHOSPHODIESTER_BOND_HYDROLYSIS_ENDONUCLEOLYTIC	78	0.04098	Down	0.0428356	0.972307
GO_LIPOXYGENASE_PATHWAY	9	0.0570716	Down	0.0428515	0.972307
GO_BRANCHING_INVOLVED_IN_LABYRINTHINE_LAYER_MORPHOGENESIS	9	0.179131	Up	0.0429196	0.972307
HOUSTIS_ROS	33	0.070625	Down	0.0429574	0.972307
REACTOME_DCC_MEDIATED_ATTRACTIVE_SIGNALING	12	0.0159188	Up	0.0429811	0.972307
PYEON_HPV_POSITIVE_TUMORS_UP	86	0.0273501	Up	0.0430753	0.972913
REACTOME_TOXICITY_OF_BOTULINUM_TOXIN_TYPE_D_BONT_D_	5	-0.0317849	Up	0.0431494	0.972913
GENTILE_UV_RESPONSE_CLUSTER_D2	37	0.063005	Up	0.0431996	0.972913
GO_MITOCHONDRIAL_PROTEIN_CATABOLIC_PROCESS	5	0.0685236	Up	0.0432027	0.972913
GO_RETINAL_CELL_PROGRAMMED_CELL_DEATH	3	-0.11703	Up	0.0432733	0.973238
MARSON_FOXP3_TARGETS_STIMULATED_DN	8	0.039552	Up	0.0433146	0.973238
POMEROY_MEDULLOBLASTOMA_PROGNOSIS_DN	44	0.107635	Down	0.0434317	0.974774
GO_RESPONSE_TO_VITAMIN_A	11	0.000564093	Up	0.0436481	0.976204
WP_EUKARYOTIC_TRANSCRIPTION_INITIATION	49	0.0322323	Down	0.0436792	0.976204
GO_CELL_MIGRATION_INVOLVED_IN_HEART_DEVELOPMENT	12	0.0177048	Down	0.0436915	0.976204
REACTOME_RNA_POLYMERASE_I_TRANSCRIPTION_INITIATION	58	0.0335463	Down	0.0436957	0.976204
HP_SHORT_PHALANX_OF_THE_THUMB	20	0.0273649	Up	0.0437671	0.976204
GO_POSITIVE_REGULATION_OF_ADIPOSE_TISSUE_DEVELOPMENT	4	0.00342821	Up	0.0437887	0.976204
GO_REGULATION_OF_OOGENESIS	7	0.0526201	Down	0.0439313	0.977474
WP_ATM_SIGNALING_PATHWAY	41	0.0178987	Up	0.0439755	0.977474
GO_C_X_C_CHEMOKINE_RECEPTOR_ACTIVITY	3	-0.0594038	Down	0.0439925	0.977474
REACTOME_SCAVENGING_BY_CLASS_A_RECEPTORS	11	0.0451886	Down	0.0441039	0.978184
GO_REGULATION_OF_PSEUDOPODIUM_ASSEMBLY	11	0.0562438	Up	0.0441224	0.978184
GO_INOSITOL_1_4_5_TRISPHOSPHATE_BINDING	7	0.000277985	Down	0.0443157	0.981382
WP_HFE_EFFECT_ON_HEPCIDIN_PRODUCTION	4	0.0592627	Up	0.0444442	0.983136
HP_REDUCED_FACTOR_XII_ACTIVITY	5	-0.0298217	Down	0.0444951	0.983174
WP_PURINERGIC_SIGNALING	15	0.0709205	Down	0.0446599	0.984764
REACTOME_SYNTHESIS_OF_15_EICOSATETRAENOIC_ACID_DERIVATIVES	5	0.197642	Down	0.0447155	0.984764
GO_REGULATION_OF_CD4_POSITIVE_ALPHA_BETA_T_CELL_DIFFERENTIATION	28	0.0782103	Up	0.0447192	0.984764
GO_HMG_BOX_DOMAIN_BINDING	7	0.023273	Up	0.0447967	0.984764
GO_ANTRAL_OVARIAN_FOLLICLE_GROWTH	6	0.0718217	Up	0.0448135	0.984764
QUINTENS_EMBRYONIC_BRAIN_RESPONSE_TO_IR	78	0.0418267	Up	0.0449863	0.98549
ODONNELL_TFRC_TARGETS_DN	113	0.0447394	Up	0.0450368	0.98549
GO_POSITIVE_REGULATION_OF_LONG_TERM_NEURONAL_SYNAPTIC_PLASTICITY	3	0.128917	Up	0.045076	0.98549
GO_ESTABLISHMENT_OR_MAINTENANCE_OF_ACTIN_CYTOSKELETON_POLARITY	4	0.128483	Up	0.0451022	0.98549
GO_TRANSCRIPTION_FACTOR_TFTC_COMPLEX	16	0.0491823	Down	0.0451706	0.98549
GO_DRUG_CATABOLIC_PROCESS	15	0.0056335	Up	0.0452152	0.98549
HP_OSTEOPOROSIS_OF_VERTEBRAE	9	-0.0163952	Down	0.0452645	0.98549
GO_CELLULAR_RESPONSE_TO_INSULIN_LIKE_GROWTH_FACTOR_STIMULUS	8	-0.00102638	Up	0.0452656	0.98549
GO_N_TERMINAL_PROTEIN_ACETYLTRANSFERASE_COMPLEX	9	0.0488475	Down	0.0452906	0.98549
SMIRNOV_RESPONSE_TO_IR_2HR_DN	61	0.0354593	Up	0.0454917	0.988265
AUJLA_IL22_AND_IL17A_SIGNALING	7	0.0187891	Up	0.0455171	0.988265
GO_CARDIAC_NEURAL_CREST_CELL_DEVELOPMENT_INVOLVED_IN_OUTFLOW_TRACT_MORPHOGENESIS	7	0.00572852	Down	0.0456241	0.989513
GO_U2_TYPE_CATALYTIC_STEP_2_SPLICEOSOME	31	0.0464606	Down	0.0458223	0.992733
GO_REGULATION_OF_CELLULAR_RESPONSE_TO_VASCULAR_ENDOTHELIAL_GROWTH_FACTOR_STIMULUS	18	-0.000857215	Down	0.0459261	0.993765
GO_POSITIVE_REGULATION_OF_CD4_POSITIVE_ALPHA_BETA_T_CELL_DIFFERENTIATION	16	0.0589886	Up	0.0459694	0.993765
GO_CELL_MOTILITY_INVOLVED_IN_CEREBRAL_CORTEX_RADIAL_GLIA_GUIDED_MIGRATION	8	0.0153711	Up	0.0460957	0.994634
GO_RNA_POLYMERASE_COMPLEX	113	0.0302124	Down	0.0461505	0.994634
GO_NEGATIVE_REGULATION_OF_METANEPHROS_DEVELOPMENT	4	0.0466784	Down	0.046159	0.994634
HP_DYSMENORRHEA	11	0.103313	Down	0.0463165	0.996953
HP_ASCENDING_AORTIC_DISSECTION	16	0.0262448	Up	0.0464209	0.998123
GO_K48_LINKED_POLYUBIQUITIN_MODIFICATION_DEPENDENT_PROTEIN_BINDING	8	0.0561868	Up	0.046503	0.998186
GO_POSITIVE_REGULATION_OF_MUSCLE_ADAPTATION	3	0.11594	Up	0.046526	0.998186
HP_INCREASED_CIRCULATING_CORTISOL_LEVEL	11	0.0592247	Up	0.046574	0.998186
GO_MANGANESE_ION_TRANSPORT	10	-0.00745452	Up	0.0466237	0.998186
GO_NEGATIVE_REGULATION_OF_VASOCONSTRICTION	6	-0.0158865	Up	0.0467051	0.99886
HOLLEMAN_VINCRISTINE_RESISTANCE_ALL_DN	19	0.203849	Down	0.0467907	0.999061
GO_POSITIVE_REGULATION_OF_DIGESTIVE_SYSTEM_PROCESS	4	0.0149078	Up	0.0468532	0.999061
REACTOME_COOPERATION_OF_PREFOLDIN_AND_TRIC_CCT_IN_ACTIN_AND_TUBULIN_FOLDING	26	0.123256	Down	0.0468646	0.999061
GO_CELLULAR_RESPONSE_TO_PURINE_CONTAINING_COMPOUND	9	-0.0104852	Down	0.0469695	0.999807
GO_INTRACELLULAR_LIPID_TRANSPORT	39	0.041034	Up	0.0470739	0.999807
REACTOME_SYNTHESIS_OF_5_EICOSATETRAENOIC_ACIDS	4	0.111991	Down	0.0470986	0.999807
GO_ACUTE_PHASE_RESPONSE	25	-0.00746874	Down	0.0472639	0.999807
GO_OLIGOPEPTIDE_TRANSPORT	11	-0.00792498	Up	0.0472742	0.999807
GO_REGULATION_OF_SULFUR_METABOLIC_PROCESS	11	0.027653	Up	0.0473502	0.999807
GO_ESCRT_I_COMPLEX	11	0.0787422	Up	0.0473877	0.999807
GO_PEPTIDASE_INHIBITOR_COMPLEX	4	0.0134965	Down	0.0474106	0.999807
LUI_THYROID_CANCER_CLUSTER_2	37	0.036191	Up	0.0474241	0.999807
DUTERTRE_ESTRADIOL_RESPONSE_24HR_DN	478	0.0497381	Up	0.0474391	0.999807
GO_PARAXIAL_MESODERM_MORPHOGENESIS	7	-0.036685	Down	0.0474884	0.999807
GO_EXTRINSIC_COMPONENT_OF_SYNAPTIC_MEMBRANE	10	0.0209923	Up	0.0475212	0.999807
GO_TRANSLOCON_COMPLEX	6	-0.0219014	Down	0.0475754	0.999807
HP_ABNORMAL_THYROID_HORMONE_LEVEL	4	0.0735971	Up	0.047645	0.999807
GO_CELLULAR_RESPONSE_TO_REACTIVE_NITROGEN_SPECIES	14	-0.00032714	Up	0.0476504	0.999807
GO_PURINE_NUCLEOSIDE_MONOPHOSPHATE_BIOSYNTHETIC_PROCESS	20	0.0506333	Down	0.0480984	0.999947
GO_NEGATIVE_REGULATION_OF_RESPONSE_TO_EXTRACELLULAR_STIMULUS	8	0.046883	Down	0.0481529	0.999947
GO_POSITIVE_REGULATION_OF_CELL_AGING	18	0.0249065	Down	0.048316	0.999947
GO_NEGATIVE_REGULATION_OF_PLATELET_AGGREGATION	10	0.105654	Down	0.0483557	0.999947
GO_STRUCTURAL_CONSTITUENT_OF_MYELIN_SHEATH	8	0.0276732	Up	0.0483592	0.999947
GO_REGULATION_OF_SMOOTHENED_SIGNALING_PATHWAY_INVOLVED_IN_DORSAL_VENTRAL_NEURAL_TUBE_PATTERNING	8	0.016297	Up	0.0485716	0.999947
HALLMARK_KRAS_SIGNALING_DN	108	0.0246334	Up	0.0486155	0.999947
GO_THYROID_HORMONE_MEDIATED_SIGNALING_PATHWAY	5	0.105489	Up	0.0486167	0.999947
GO_T_CELL_DIFFERENTIATION_INVOLVED_IN_IMMUNE_RESPONSE	40	0.0279189	Up	0.0486797	0.999947
GO_POLYSOME	64	0.108396	Down	0.0487429	0.999947
GO_ATRIOVENTRICULAR_VALVE_FORMATION	6	0.0741968	Up	0.048911	0.999947
BIOCARTA_DSP_PATHWAY	9	-0.0579472	Down	0.0491297	0.999947
REACTOME_GLUTATHIONE_CONJUGATION	29	0.0367408	Down	0.0491619	0.999947
HP_ANGIOFIBROMAS	25	0.0488406	Up	0.0491841	0.999947
REACTOME_CONDENSATION_OF_PROPHASE_CHROMOSOMES	13	0.0571342	Up	0.0492146	0.999947
HP_SECUNDUM_ATRIAL_SEPTAL_DEFECT	4	0.00541772	Down	0.0492535	0.999947
GO_C21_STEROID_HORMONE_METABOLIC_PROCESS	25	0.0375626	Down	0.0493039	0.999947
GO_STEROID_DEHYDROGENASE_ACTIVITY	29	0.0307994	Down	0.0493044	0.999947
GO_PEPTIDYL_SERINE_DEPHOSPHORYLATION	19	0.0438771	Up	0.0494059	0.999947
GO_HEAD_MORPHOGENESIS	32	0.0206995	Up	0.049466	0.999947
LI_DCP2_BOUND_MRNA	91	0.0852345	Down	0.0495874	0.999947
KRASNOSELSKAYA_ILF3_TARGETS_UP	33	0.0165535	Down	0.0496139	0.999947
GO_REGULATION_OF_SKELETAL_MUSCLE_CONTRACTION	6	0.0513779	Down	0.0496844	0.999947
GO_PHOSPHATIDYLINOSITOL_3_KINASE_BINDING	22	0.0679969	Up	0.0497496	0.999947
GO_NEGATIVE_REGULATION_OF_CYTOPLASMIC_TRANSLATION	7	0.0942627	Up	0.0498357	0.999947
HP_URETEROPELVIC_JUNCTION_OBSTRUCTION	12	0.0148283	Up	0.049837	0.999947
REACTOME_RNA_POLYMERASE_I_TRANSCRIPTION	62	0.035173	Down	0.0498627	0.999947
HP_BUDD_CHIARI_SYNDROME	4	0.0584182	Up	0.0498731	0.999947
GRAHAM_CML_QUIESCENT_VS_CML_DIVIDING_UP	18	0.017355	Up	0.0499442	0.999947
GO_REGULATION_OF_RECEPTOR_CLUSTERING	8	0.0955833	Up	0.0500945	0.999947
KYNG_ENVIRONMENTAL_STRESS_RESPONSE_NOT_BY_4NQO_IN_OLD	15	-0.00194126	Down	0.0501308	0.999947
HP_CONGENITAL_PSEUDOARTHROSIS_OF_THE_CLAVICLE	5	0.251607	Down	0.0502318	0.999947
YU_BAP1_TARGETS	28	0.0270768	Up	0.0503074	0.999947
HP_CORNEAL_ULCERATION	6	0.171866	Down	0.0503695	0.999947
DANG_MYC_TARGETS_UP	127	0.0890938	Down	0.0504078	0.999947
GABRIELY_MIR21_TARGETS	282	0.054183	Up	0.0504456	0.999947
HP_APLASIA_HYPOPLASIA_OF_THE_ABDOMINAL_WALL_MUSCULATURE	30	0.0316898	Up	0.0504918	0.999947
GO_POSITIVE_REGULATION_OF_CAMP_DEPENDENT_PROTEIN_KINASE_ACTIVITY	5	0.0197541	Down	0.0505158	0.999947
GO_RIBONUCLEASE_MRP_COMPLEX	8	0.160693	Down	0.0505644	0.999947
GO_PHOSPHATIDYLINOSITOL_KINASE_ACTIVITY	14	0.0107348	Up	0.0505698	0.999947
GO_PEROXIREDOXIN_ACTIVITY	7	0.165667	Down	0.0505721	0.999947
GO_POSITIVE_REGULATION_OF_ODONTOGENESIS	6	0.00570449	Up	0.0506552	0.999947
HP_FEMALE_PSEUDOHERMAPHRODITISM	6	0.0256267	Down	0.0507606	0.999947
GAVIN_FOXP3_TARGETS_CLUSTER_T7	101	0.0617851	Down	0.0507879	0.999947
GO_TRNA_SPECIFIC_RIBONUCLEASE_ACTIVITY	19	0.0336204	Down	0.0509428	0.999947
GO_LIPID_DROPLET_FORMATION	10	0.0462636	Up	0.0509528	0.999947
GO_HISTONE_ACETYLTRANSFERASE_BINDING	27	0.0346979	Down	0.0511579	0.999947
GO_MLL1_2_COMPLEX	34	0.00544484	Down	0.0512744	0.999947
HP_SUBCUTANEOUS_LIPOMA	11	0.113269	Up	0.0513312	0.999947
RIZ_ERYTHROID_DIFFERENTIATION	85	0.0281113	Up	0.0513603	0.999947
HP_PAROXYSMAL_DYSKINESIA	3	0.125537	Down	0.0513739	0.999947
GO_TRANSFORMING_GROWTH_FACTOR_BETA_RECEPTOR_ACTIVITY_TYPE_I	4	0.0574496	Up	0.0514835	0.999947
HP_HYPOINSULINEMIA	9	-0.0423071	Up	0.0515532	0.999947
GO_PROTEIN_TYROSINE_KINASE_ACTIVATOR_ACTIVITY	12	-0.00958695	Up	0.0516134	0.999947
GO_NEGATIVE_REGULATION_OF_VASCULAR_ASSOCIATED_SMOOTH_MUSCLE_CELL_PROLIFERATION	15	0.0100087	Up	0.051659	0.999947
GO_DESMOSOME	22	0.204441	Up	0.0517227	0.999947
REACTOME_METABOLISM_OF_AMINO_ACIDS_AND_DERIVATIVES	314	0.0787076	Down	0.0517806	0.999947
WP_CYTOKINES_AND_INFLAMMATORY_RESPONSE	13	-0.028651	Up	0.0518237	0.999947
GO_LONG_CHAIN_FATTY_ACID_BINDING	9	0.0876132	Up	0.0519415	0.999947
GO_ADRENERGIC_RECEPTOR_ACTIVITY	3	0.00469657	Down	0.052069	0.999947
REACTOME_ADRENOCEPTORS	3	0.00469657	Down	0.052069	0.999947
GO_NATURAL_KILLER_CELL_LECTIN_LIKE_RECEPTOR_BINDING	16	-0.00389784	Up	0.052132	0.999947
GO_L_ARGININE_TRANSMEMBRANE_TRANSPORTER_ACTIVITY	3	0.00271841	Up	0.0522961	0.999947
REACTOME_ERYTHROPOIETIN_ACTIVATES_PHOSPHOINOSITIDE_3_KINASE_PI3K_	9	0.0373319	Up	0.0523401	0.999947
SHIN_B_CELL_LYMPHOMA_CLUSTER_6	7	0.00647934	Up	0.0523962	0.999947
GO_DNA_CATABOLIC_PROCESS_EXONUCLEOLYTIC	7	0.104466	Down	0.0525087	0.999947
GO_SECRETORY_GRANULE_LOCALIZATION	9	0.0427724	Up	0.0525628	0.999947
GO_CERAMIDE_TRANSPORT	11	0.106771	Up	0.052711	0.999947
GO_REGULATION_OF_MESODERMAL_CELL_DIFFERENTIATION	4	0.00095484	Down	0.0527666	0.999947
GO_REGULATION_OF_MESODERM_FORMATION	4	0.00095484	Down	0.0527666	0.999947
GO_GLUTAMINE_METABOLIC_PROCESS	18	0.0238747	Down	0.0527822	0.999947
ZHANG_RESPONSE_TO_CANTHARIDIN_UP	13	0.0654043	Up	0.052794	0.999947
GO_SCARNA_LOCALIZATION_TO_CAJAL_BODY	5	0.144975	Down	0.0527945	0.999947
REACTOME_NUCLEOBASE_BIOSYNTHESIS	14	0.0507233	Down	0.0528582	0.999947
CHIARADONNA_NEOPLASTIC_TRANSFORMATION_KRAS_CDC25_UP	54	0.0571411	Down	0.0528854	0.999947
REACTOME_CYTOSOLIC_SENSORS_OF_PATHOGEN_ASSOCIATED_DNA_	61	0.0369213	Down	0.0530131	0.999947
GO_REGULATION_OF_CD4_POSITIVE_ALPHA_BETA_T_CELL_ACTIVATION	41	0.0646839	Up	0.0530809	0.999947
GO_RNA_CAP_BINDING	18	0.0484441	Down	0.0531521	0.999947
REACTOME_SIGNALING_BY_ROBO_RECEPTORS	211	0.129712	Down	0.0532772	0.999947
BRUNEAU_SEPTATION_VENTRICULAR	6	0.00858314	Up	0.0533496	0.999947
GO_MUSCLE_ORGAN_MORPHOGENESIS	48	0.0526796	Up	0.0533687	0.999947
GO_FOREBRAIN_NEURON_FATE_COMMITMENT	4	0.0155134	Up	0.0534158	0.999947
GO_SMOOTH_MUSCLE_CELL_MATRIX_ADHESION	8	-0.0128073	Down	0.0534727	0.999947
GO_CELLULAR_TRANSITION_METAL_ION_HOMEOSTASIS	88	0.0477013	Down	0.0534878	0.999947
REACTOME_SCAVENGING_BY_CLASS_B_RECEPTORS	3	-0.097857	Down	0.0535397	0.999947
RORIE_TARGETS_OF_EWSR1_FLI1_FUSION_UP	35	0.0249385	Up	0.0536851	0.999947
GO_NEGATIVE_REGULATION_OF_VASCULAR_PERMEABILITY	9	0.0614788	Up	0.0537366	0.999947
REACTOME_RUNX2_REGULATES_BONE_DEVELOPMENT	24	0.0806742	Up	0.0537376	0.999947
REACTOME_MITOCHONDRIAL_TRNA_AMINOACYLATION	20	0.017613	Down	0.0537402	0.999947
GO_INTERMEMBRANE_LIPID_TRANSFER	34	0.0386011	Up	0.0539144	0.999947
GO_SMALL_RIBOSOMAL_SUBUNIT_RRNA_BINDING	10	0.0649403	Down	0.0541709	0.999947
GO_HEAT_GENERATION	15	-0.013648	Down	0.0542273	0.999947
GO_REGULATION_OF_BLOOD_BRAIN_BARRIER_PERMEABILITY	6	0.0259648	Up	0.0542352	0.999947
GO_METANEPHRIC_GLOMERULUS_VASCULATURE_DEVELOPMENT	4	0.0788878	Down	0.0542849	0.999947
GO_RESPONSE_TO_NITRIC_OXIDE	13	0.0447983	Up	0.0543225	0.999947
KEGG_SULFUR_METABOLISM	11	-0.00766212	Up	0.0544821	0.999947
ELLWOOD_MYC_TARGETS_UP	14	0.0667611	Down	0.0544821	0.999947
GO_TRANSITION_METAL_ION_HOMEOSTASIS	109	0.0440748	Down	0.0545467	0.999947
VARELA_ZMPSTE24_TARGETS_DN	29	0.0209847	Down	0.0547026	0.999947
GO_PURINERGIC_NUCLEOTIDE_RECEPTOR_SIGNALING_PATHWAY	13	0.0384423	Down	0.0548319	0.999947
LIANG_SILENCED_BY_METHYLATION_2	45	0.0211739	Down	0.0549588	0.999947
GO_MULTIMERIC_RIBONUCLEASE_P_COMPLEX	13	0.0209029	Down	0.0550212	0.999947
GO_RIBONUCLEASE_P_RNA_BINDING	13	0.0209029	Down	0.0550212	0.999947
GO_MITOCHONDRIAL_INTERMEMBRANE_SPACE_PROTEIN_TRANSPORTER_COMPLEX	5	0.109884	Down	0.0550818	0.999947
GO_HAIR_FOLLICLE_PLACODE_FORMATION	4	0.0347841	Down	0.0551078	0.999947
MALONEY_RESPONSE_TO_17AAG_DN	75	0.0926722	Down	0.0551634	0.999947
BROWNE_HCMV_INFECTION_4HR_UP	43	0.0260236	Down	0.0554133	0.999947
GO_AU_RICH_ELEMENT_BINDING	24	0.0458072	Up	0.0554583	0.999947
TSAI_DNAJB4_TARGETS_UP	13	0.0487349	Up	0.0556917	0.999947
GO_VASCULAR_ENDOTHELIAL_GROWTH_FACTOR_SIGNALING_PATHWAY	30	0.00326469	Down	0.055764	0.999947
GO_CONDENSIN_COMPLEX	8	0.0685177	Up	0.0558748	0.999947
GO_ARF_GUANYL_NUCLEOTIDE_EXCHANGE_FACTOR_ACTIVITY	16	0.0645895	Up	0.055928	0.999947
GO_ESTABLISHMENT_OF_PROTEIN_LOCALIZATION_TO_TELOMERE	17	0.0327977	Down	0.0559295	0.999947
MARSON_FOXP3_CORE_DIRECT_TARGETS	11	-0.00117012	Down	0.0559305	0.999947
BURTON_ADIPOGENESIS_PEAK_AT_24HR	42	0.0403021	Up	0.0559332	0.999947
HP_HEAT_INTOLERANCE	12	0.0519163	Up	0.0559536	0.999947
REACTOME_PTK6_EXPRESSION	5	0.0280107	Down	0.0559718	0.999947
GO_CONDENSED_NUCLEAR_CHROMOSOME_KINETOCHORE	17	0.0347806	Up	0.056132	0.999947
WP_TGIF_DISRUPTION_OF_SHH_SIGNALING	5	0.220976	Up	0.0563432	0.999947
GO_PROTEIN_LOCALIZATION_TO_ENDOPLASMIC_RETICULUM	144	0.17569	Down	0.0563878	0.999947
HP_SAGITTAL_CRANIOSYNOSTOSIS	14	0.0397849	Up	0.056389	0.999947
GO_INNER_MITOCHONDRIAL_MEMBRANE_PROTEIN_COMPLEX	140	0.0728137	Down	0.0563983	0.999947
REACTOME_RESPIRATORY_ELECTRON_TRANSPORT	103	0.067513	Down	0.0564976	0.999947
HP_ADRENOCORTICAL_CARCINOMA	10	0.103711	Up	0.0565501	0.999947
BILANGES_SERUM_RESPONSE_TRANSLATION	29	0.196042	Down	0.0565795	0.999947
GO_CALCITONIN_FAMILY_RECEPTOR_SIGNALING_PATHWAY	3	-0.0940643	Up	0.0566143	0.999947
HP_HIP_FLEXOR_WEAKNESS	8	0.0166213	Up	0.0566457	0.999947
MODY_HIPPOCAMPUS_PRENATAL	40	0.0985216	Down	0.0566711	0.999947
GO_MESENCHYMAL_CELL_APOPTOTIC_PROCESS	7	0.00775464	Down	0.0566715	0.999947
WP_PI3KAKTMTOR_SIGNALING_PATHWAY_AND_THERAPEUTIC_OPPORTUNITIES	29	0.049494	Up	0.0567045	0.999947
HP_APLASIA_HYPOPLASIA_OF_THE_THYMUS	31	0.0223389	Down	0.0567524	0.999947
GO_MESONEPHRIC_DUCT_DEVELOPMENT	5	-0.0191523	Down	0.056758	0.999947
GO_DNA_TEMPLATED_TRANSCRIPTION_TERMINATION	85	0.0376014	Down	0.056823	0.999947
GO_REGULATION_OF_SYNCYTIUM_FORMATION_BY_PLASMA_MEMBRANE_FUSION	20	0.00462569	Down	0.05685	0.999947
HP_ESOPHAGEAL_STRICTURE	14	0.0379832	Down	0.0568513	0.999947
WP_LNCRNAMEDIATED_MECHANISMS_OF_THERAPEUTIC_RESISTANCE	4	-0.0504972	Up	0.056887	0.999947
GENTILE_UV_RESPONSE_CLUSTER_D9	25	0.0740697	Up	0.0572035	0.999947
MIKKELSEN_MCV6_LCP_WITH_H3K27ME3	7	-0.0364261	Up	0.057284	0.999947
GO_NEGATIVE_REGULATION_OF_HISTONE_H4_ACETYLATION	5	0.0759012	Down	0.0573445	0.999947
GO_5_DEOXYRIBOSE_5_PHOSPHATE_LYASE_ACTIVITY	5	0.100596	Down	0.0574288	0.999947
GO_ANTEROGRADE_NEURONAL_DENSE_CORE_VESICLE_TRANSPORT	6	0.00549966	Up	0.0575019	0.999947
GO_CARDIAC_NEURAL_CREST_CELL_DIFFERENTIATION_INVOLVED_IN_HEART_DEVELOPMENT	9	0.0148798	Down	0.0575842	0.999947
GO_PURINE_CONTAINING_COMPOUND_CATABOLIC_PROCESS	43	0.0445534	Down	0.0576237	0.999947
GRASEMANN_RETINOBLASTOMA_WITH_6P_AMPLIFICATION	24	0.0166453	Down	0.0576696	0.999947
GO_ACTIVIN_ACTIVATED_RECEPTOR_ACTIVITY	8	0.0843324	Up	0.0577281	0.999947
WP_OXIDATIVE_DAMAGE	34	0.0382919	Up	0.0577439	0.999947
KIM_MYC_AMPLIFICATION_TARGETS_DN	92	0.0234331	Up	0.0577502	0.999947
LIU_VAV3_PROSTATE_CARCINOGENESIS_UP	59	0.0211418	Down	0.0577533	0.999947
IVANOVA_HEMATOPOIESIS_INTERMEDIATE_PROGENITOR	129	0.0409172	Down	0.0577827	0.999947
GO_CD4_POSITIVE_ALPHA_BETA_T_CELL_DIFFERENTIATION	46	0.038641	Up	0.0578325	0.999947
GO_MESENCHYMAL_STEM_CELL_PROLIFERATION	4	0.114388	Down	0.0578422	0.999947
HALLMARK_OXIDATIVE_PHOSPHORYLATION	201	0.06288	Down	0.0578543	0.999947
GO_ACTIVIN_RECEPTOR_COMPLEX	6	0.0270553	Up	0.0579673	0.999947
REACTOME_G2_M_DNA_REPLICATION_CHECKPOINT	5	0.0233512	Up	0.0580354	0.999947
GO_SEX_DETERMINATION	12	0.0252561	Down	0.0583589	0.999947
BIOCARTA_SALMONELLA_PATHWAY	4	0.165428	Up	0.058402	0.999947
MARTIN_VIRAL_GPCR_SIGNALING_UP	59	0.0264716	Up	0.0584673	0.999947
GO_NEGATIVE_REGULATION_OF_BONE_MINERALIZATION	10	-0.0323058	Down	0.0585558	0.999947
GO_1_PHOSPHATIDYLINOSITOL_4_PHOSPHATE_3_KINASE_ACTIVITY	5	0.171389	Up	0.0585657	0.999947
GO_COPPER_ION_TRANSMEMBRANE_TRANSPORTER_ACTIVITY	5	0.0705826	Up	0.0586098	0.999947
GO_CONNEXIN_COMPLEX	11	0.0887642	Down	0.0587224	0.999947
GO_GAP_JUNCTION_CHANNEL_ACTIVITY	11	0.0887642	Down	0.0587224	0.999947
HP_EXSTROPHY	5	0.0581393	Down	0.0587907	0.999947
LINDGREN_BLADDER_CANCER_CLUSTER_2A_UP	6	0.102945	Down	0.0588952	0.999947
REACTOME_SYNTHESIS_OF_12_EICOSATETRAENOIC_ACID_DERIVATIVES	5	0.115533	Down	0.059059	0.999947
GO_REGULATION_OF_RELAXATION_OF_CARDIAC_MUSCLE	3	-0.118313	Down	0.0590885	0.999947
HP_INCREASED_DENSITY_OF_LONG_BONES	8	0.0681352	Up	0.0591535	0.999947
GO_IMP_METABOLIC_PROCESS	11	0.0454174	Down	0.0593522	0.999947
GO_REGULATION_OF_KERATINOCYTE_MIGRATION	15	0.0509557	Up	0.0593582	0.999947
GO_RIBOSOMAL_LARGE_SUBUNIT_EXPORT_FROM_NUCLEUS	7	0.0503535	Down	0.0593951	0.999947
MATZUK_OVULATION	10	0.0060512	Down	0.0594608	0.999947
KEGG_HEMATOPOIETIC_CELL_LINEAGE	37	0.00201442	Down	0.0594816	0.999947
GO_URONIC_ACID_METABOLIC_PROCESS	11	-0.00530313	Down	0.059504	0.999947
WHITEFORD_PEDIATRIC_CANCER_MARKERS	107	0.038363	Up	0.0595077	0.999947
DANG_REGULATED_BY_MYC_UP	68	0.056376	Down	0.0597188	0.999947
GO_EMBRYONIC_PLACENTA_MORPHOGENESIS	20	0.112896	Up	0.0598068	0.999947
HP_ABNORMAL_URINE_HORMONE_LEVEL	8	0.105736	Up	0.0598237	0.999947
HP_ABNORMALITY_OF_LYSOSOMAL_METABOLISM	8	0.0701943	Up	0.0599253	0.999947
HP_VERTICAL_NYSTAGMUS	8	-0.0156418	Up	0.0599962	0.999947
GO_PHOSPHATIDYLINOSITOL_PHOSPHORYLATION	50	0.0358266	Up	0.0600014	0.999947
HP_MACROCYTIC_ANEMIA	45	0.0832472	Down	0.0600142	0.999947
REACTOME_PURINE_SALVAGE	11	0.0474501	Down	0.0600746	0.999947
ABBUD_LIF_SIGNALING_1_DN	21	0.0540244	Up	0.0601282	0.999947
HP_DECREASED_ADIPOSE_TISSUE	36	0.0325248	Down	0.0601391	0.999947
GO_HIPPO_SIGNALING	46	0.0574069	Up	0.0601675	0.999947
GO_NEGATIVE_REGULATION_OF_MAP_KINASE_ACTIVITY	66	0.0436339	Down	0.0601805	0.999947
KEGG_METABOLISM_OF_XENOBIOTICS_BY_CYTOCHROME_P450	36	0.0218424	Down	0.0602157	0.999947
HP_LARYNGEAL_DYSTONIA	9	0.0356439	Down	0.0602869	0.999947
GO_INTERLEUKIN_1_ALPHA_PRODUCTION	5	-0.0479441	Down	0.0604001	0.999947
FERRARI_RESPONSE_TO_FENRETINIDE_UP	20	0.100968	Up	0.0604315	0.999947
GO_PROTEIN_TYROSINE_THREONINE_PHOSPHATASE_ACTIVITY	10	0.0497447	Down	0.0604504	0.999947
GO_POSITIVE_REGULATION_OF_CD4_POSITIVE_ALPHA_BETA_T_CELL_ACTIVATION	20	0.0629396	Up	0.0605089	0.999947
KEGG_NICOTINATE_AND_NICOTINAMIDE_METABOLISM	20	0.00150601	Down	0.0605275	0.999947
GO_PHOSPHOLIPID_TRANSFER_ACTIVITY	20	0.0451074	Up	0.0605391	0.999947
GO_U12_TYPE_SPLICEOSOMAL_COMPLEX	26	0.0736347	Down	0.0608034	0.999947
GO_PROTEIN_IMPORT_INTO_MITOCHONDRIAL_MATRIX	19	0.0799187	Down	0.0609494	0.999947
REACTOME_CARNITINE_METABOLISM	14	0.00666596	Up	0.0610219	0.999947
FARMER_BREAST_CANCER_CLUSTER_3	16	0.129828	Up	0.0611171	0.999947
GO_ESTABLISHMENT_OF_CENTROSOME_LOCALIZATION	9	0.0679406	Up	0.0611989	0.999947
GO_NEGATIVE_REGULATION_OF_ADENYLATE_CYCLASE_ACTIVATING_G_PROTEIN_COUPLED_RECEPTOR_SIGNALING_PATHWAY	6	-0.00759988	Down	0.0612539	0.999947
GO_LYMPHOCYTE_AGGREGATION	4	0.0323505	Down	0.0612709	0.999947
HOLLERN_SOLID_NODULAR_BREAST_TUMOR_UP	7	-0.0251467	Up	0.0612898	0.999947
GO_MODIFIED_AMINO_ACID_TRANSMEMBRANE_TRANSPORTER_ACTIVITY	16	-0.00746398	Up	0.0612981	0.999947
GOUYER_TUMOR_INVASIVENESS	8	0.0175322	Down	0.0613869	0.999947
GO_NEGATIVE_REGULATION_OF_T_CELL_MEDIATED_CYTOTOXICITY	7	-0.0396328	Down	0.0614125	0.999947
HP_JERKY_OCULAR_PURSUIT_MOVEMENTS	5	0.130546	Up	0.0614845	0.999947
GO_PYRIMIDINE_RIBONUCLEOSIDE_TRIPHOSPHATE_METABOLIC_PROCESS	14	0.0604728	Down	0.0615486	0.999947
REACTOME_INTRAFLAGELLAR_TRANSPORT	47	0.0614653	Down	0.0616478	0.999947
GO_NEGATIVE_REGULATION_OF_MYELOID_LEUKOCYTE_DIFFERENTIATION	32	0.0161487	Down	0.0616549	0.999947
LIU_CDX2_TARGETS_UP	12	0.0122817	Down	0.0617058	0.999947
WP_PROSTAGLANDIN_SYNTHESIS_AND_REGULATION	32	0.0558429	Down	0.0617203	0.999947
GO_SNRNA_BINDING	50	0.0307768	Down	0.0617376	0.999947
BIOCARTA_ION_PATHWAY	4	0.00543543	Down	0.0618297	0.999947
SUZUKI_CTCFL_TARGETS_UP	7	0.0391055	Down	0.0619688	0.999947
HP_THORACOLUMBAR_SCOLIOSIS	18	0.0301949	Down	0.0619711	0.999947
GO_CHOLESTEROL_STORAGE	14	0.021232	Up	0.0619949	0.999947
GO_PARAXIAL_MESODERM_FORMATION	4	-0.115719	Down	0.0620146	0.999947
KREPPEL_CD99_TARGETS_DN	6	0.160981	Up	0.0620367	0.999947
FINETTI_BREAST_CANCER_KINOME_RED	16	0.0561148	Up	0.0621242	0.999947
SCHLOSSER_MYC_TARGETS_AND_SERUM_RESPONSE_UP	50	0.102037	Down	0.0622467	0.999947
GO_EUKARYOTIC_TRANSLATION_INITIATION_FACTOR_3_COMPLEX	17	0.0903962	Down	0.062259	0.999947
GO_NEGATIVE_REGULATION_OF_BLOOD_VESSEL_ENDOTHELIAL_CELL_PROLIFERATION_INVOLVED_IN_SPROUTING_ANGIOGENESIS	5	0.121711	Up	0.0622642	0.999947
HP_FOCAL_T2_HYPERINTENSE_BRAINSTEM_LESION	34	0.0281751	Down	0.0624023	0.999947
HP_BROAD_NECK	20	0.0221953	Down	0.0624202	0.999947
FURUKAWA_DUSP6_TARGETS_PCI35_UP	60	0.0287912	Down	0.0624421	0.999947
REACTOME_RESPIRATORY_ELECTRON_TRANSPORT_ATP_SYNTHESIS_BY_CHEMIOSMOTIC_COUPLING_AND_HEAT_PRODUCTION_BY_UNCOUPLING_PROTEINS_	125	0.0682685	Down	0.0624525	0.999947
HOELZEL_NF1_TARGETS_DN	71	0.016086	Up	0.0624721	0.999947
GO_ELASTIN_METABOLIC_PROCESS	5	0.0388089	Down	0.062501	0.999947
HP_OVAL_FACE	9	0.0157488	Down	0.0625092	0.999947
GO_ANATOMICAL_STRUCTURE_ARRANGEMENT	12	0.0646167	Up	0.0625368	0.999947
GO_CARDIAC_ATRIUM_MORPHOGENESIS	20	0.114827	Up	0.0626013	0.999947
KEGG_ARGININE_AND_PROLINE_METABOLISM	43	0.0414411	Down	0.0626509	0.999947
ZHOU_PANCREATIC_ENDOCRINE_PROGENITOR	4	-0.0142483	Down	0.0626823	0.999947
HP_PROGEROID_FACIAL_APPEARANCE	13	0.00925518	Down	0.0627126	0.999947
GO_PHOSPHOLIPID_TRANSPORT	72	0.0227251	Up	0.0627138	0.999947
WP_GDNFRET_SIGNALLING_AXIS	13	-0.0185794	Down	0.0627987	0.999947
HP_BURKITT_LYMPHOMA	5	0.0342726	Down	0.0628833	0.999947
GO_BODY_MORPHOGENESIS	42	0.0340461	Up	0.0630398	0.999947
GO_RIBONUCLEOSIDE_MONOPHOSPHATE_BIOSYNTHETIC_PROCESS	30	0.0622898	Down	0.06309	0.999947
KARLSSON_TGFB1_TARGETS_UP	117	0.0781333	Down	0.0631064	0.999947
GO_SM_LIKE_PROTEIN_FAMILY_COMPLEX	84	0.0361105	Down	0.06323	0.999947
HP_SEVERE_DEMYELINATION_OF_THE_WHITE_MATTER	5	0.0270112	Up	0.0634747	0.999947
GO_SKELETAL_MUSCLE_CELL_PROLIFERATION	9	0.0182074	Up	0.063524	0.999947
TESAR_ALK_TARGETS_HUMAN_ES_5D_DN	3	0.0549888	Down	0.0635683	0.999947
ZWANG_DOWN_BY_2ND_EGF_PULSE	224	0.0169961	Up	0.0635899	0.999947
GO_ADENOSINE_METABOLIC_PROCESS	5	-0.0292458	Down	0.0636185	0.999947
GO_NUCLEOID	43	0.077497	Down	0.0637138	0.999947
HALLMARK_MYC_TARGETS_V1	203	0.0949973	Down	0.0637257	0.999947
VANTVEER_BREAST_CANCER_BRCA1_DN	35	0.0628021	Up	0.063813	0.999947
HP_ABNORMAL_OPTICAL_COHERENCE_TOMOGRAPHY	6	-0.0105584	Down	0.0638433	0.999947
CHEOK_RESPONSE_TO_MERCAPTOPURINE_UP	12	-0.000960696	Down	0.0641662	0.999947
GO_PHOSPHATIDYLGLYCEROL_BIOSYNTHETIC_PROCESS	11	-0.00614337	Down	0.0642154	0.999947
GO_MRNA_CIS_SPLICING_VIA_SPLICEOSOME	31	0.0572535	Down	0.064282	0.999947
GO_RETINAL_ROD_CELL_DEVELOPMENT	5	-0.0763025	Down	0.064366	0.999947
KEGG_GRAFT_VERSUS_HOST_DISEASE	38	0.00147544	Down	0.064472	0.999947
GO_POSITIVE_REGULATION_OF_CATION_CHANNEL_ACTIVITY	42	0.0234487	Down	0.0646527	0.999947
MEDINA_SMARCA4_TARGETS	31	0.0213391	Up	0.0646807	0.999947
HP_ABNORMAL_LEFT_VENTRICULAR_OUTFLOW_TRACT_MORPHOLOGY	12	0.0615108	Up	0.0648263	0.999947
REACTOME_BINDING_AND_UPTAKE_OF_LIGANDS_BY_SCAVENGER_RECEPTORS	22	0.0409788	Down	0.0649807	0.999947
GO_EXTRAEMBRYONIC_MEMBRANE_DEVELOPMENT	8	0.0214662	Up	0.0650408	0.999947
HP_ABSENT_NIPPLE	8	0.0244999	Down	0.0651277	0.999947
OZANNE_AP1_TARGETS_UP	12	0.0852978	Down	0.0651951	0.999947
GO_GLYCOSYL_COMPOUND_BIOSYNTHETIC_PROCESS	39	0.046558	Down	0.0652866	0.999947
TAKAYAMA_BOUND_BY_AR	7	0.0205586	Up	0.0654686	0.999947
HP_IMPAIRED_TACTILE_SENSATION	11	0.0896167	Down	0.0654703	0.999947
GO_DRUG_BINDING	67	0.0434468	Down	0.065569	0.999947
SWEET_KRAS_TARGETS_DN	50	0.0651322	Down	0.0656287	0.999947
GO_GLYCOSIDE_METABOLIC_PROCESS	17	0.0628642	Down	0.0657173	0.999947
BIOCARTA_MALATEX_PATHWAY	8	0.00429687	Up	0.0657325	0.999947
RIZ_ERYTHROID_DIFFERENTIATION_6HR	23	0.00669137	Down	0.065783	0.999947
GO_CAP_INDEPENDENT_TRANSLATIONAL_INITIATION	5	0.138888	Down	0.0658323	0.999947
GO_CYCLOSPORIN_A_BINDING	14	0.0801747	Down	0.0661077	0.999947
HP_MELANOCYTIC_NEVUS	55	0.0370104	Up	0.066161	0.999947
STAMBOLSKY_RESPONSE_TO_VITAMIN_D3_DN	19	0.0306492	Up	0.0661767	0.999947
GO_CELLULAR_RESPONSE_TO_DSRNA	25	0.00601084	Down	0.0662062	0.999947
REACTOME_FGFR3_LIGAND_BINDING_AND_ACTIVATION	5	-0.0103541	Up	0.0662251	0.999947
HP_PERIODIC_HYPOKALEMIC_PARESIS	3	0.106226	Up	0.066232	0.999947
GO_PROTECTION_FROM_NATURAL_KILLER_CELL_MEDIATED_CYTOTOXICITY	14	0.0159381	Down	0.0663059	0.999947
GO_REGULATION_OF_DNA_DAMAGE_RESPONSE_SIGNAL_TRANSDUCTION_BY_P53_CLASS_MEDIATOR	34	0.0297413	Down	0.0663187	0.999947
GO_INTRINSIC_APOPTOTIC_SIGNALING_PATHWAY_IN_RESPONSE_TO_HYDROGEN_PEROXIDE	5	-0.00417831	Down	0.0663382	0.999947
GO_CARBOXYPEPTIDASE_ACTIVITY	24	0.00595623	Up	0.0664351	0.999947
GO_POSITIVE_REGULATION_OF_OSTEOBLAST_PROLIFERATION	6	0.133132	Up	0.0665145	0.999947
REACTOME_NEGATIVE_EPIGENETIC_REGULATION_OF_RRNA_EXPRESSION	56	0.0242769	Down	0.0665797	0.999947
CAIRO_PML_TARGETS_BOUND_BY_MYC_DN	15	0.147093	Up	0.066663	0.999947
HP_LIMB_PAIN	11	0.0400897	Down	0.0667092	0.999947
HP_MACULAR_SCAR	7	-0.0769304	Down	0.0667123	0.999947
GO_VOLTAGE_GATED_SODIUM_CHANNEL_ACTIVITY	10	-0.00976566	Up	0.0667267	0.999947
GO_REGULATION_OF_PROTEIN_LOCALIZATION_TO_CHROMOSOME_TELOMERIC_REGION	13	0.0974439	Down	0.0667283	0.999947
HP_OVARIAN_PAPILLARY_ADENOCARCINOMA	6	0.0915051	Down	0.0667509	0.999947
GO_HEPOXILIN_METABOLIC_PROCESS	5	0.111686	Down	0.0667879	0.999947
GO_ADRENERGIC_RECEPTOR_SIGNALING_PATHWAY	15	0.0430195	Down	0.0668829	0.999947
REACTOME_PROTEIN_FOLDING	90	0.0400807	Down	0.0670536	0.999947
GO_SODIUM_CHANNEL_COMPLEX	10	0.0262282	Up	0.0670886	0.999947
HP_CALCIFICATION_OF_CARTILAGE	7	0.0102991	Down	0.0672092	0.999947
GO_UDP_N_ACETYLGLUCOSAMINE_TRANSMEMBRANE_TRANSPORT	4	0.0282733	Up	0.067298	0.999947
GO_UDP_N_ACETYLGLUCOSAMINE_TRANSMEMBRANE_TRANSPORTER_ACTIVITY	4	0.0282733	Up	0.067298	0.999947
GO_NEGATIVE_REGULATION_OF_LEUKOCYTE_MEDIATED_CYTOTOXICITY	28	0.00319448	Down	0.0673509	0.999947
GO_PDZ_DOMAIN_BINDING	63	0.027105	Up	0.0673845	0.999947
GO_CARDIAC_ATRIUM_DEVELOPMENT	25	0.0712347	Up	0.0674434	0.999947
GO_MEIOSIS_II_CELL_CYCLE_PROCESS	9	0.0170051	Up	0.0674831	0.999947
WP_REGULATION_OF_SISTER_CHROMATID_SEPARATION_AT_THE_METAPHASEANAPHASE_TRANSITION	15	0.0297299	Up	0.0676199	0.999947
SARTIPY_NORMAL_AT_INSULIN_RESISTANCE_UP	28	0.065935	Down	0.06764	0.999947
HADDAD_T_LYMPHOCYTE_AND_NK_PROGENITOR_UP	70	0.0520829	Up	0.0678502	0.999947
GARGALOVIC_RESPONSE_TO_OXIDIZED_PHOSPHOLIPIDS_SALMON_DN	10	-0.0100716	Up	0.0680233	0.999947
HU_GENOTOXIC_DAMAGE_24HR	32	0.0797152	Down	0.0680439	0.999947
MOOTHA_MITOCHONDRIA	430	0.0438174	Down	0.0680549	0.999947
GO_REGULATION_OF_METANEPHROS_DEVELOPMENT	14	0.00164222	Down	0.0680989	0.999947
HP_SOFT_TISSUE_NEOPLASM	5	0.0397673	Up	0.0681448	0.999947
MATZUK_POSTIMPLANTATION_AND_POSTPARTUM	10	0.0678945	Up	0.0681524	0.999947
GO_MESODERMAL_CELL_DIFFERENTIATION	20	0.0678339	Down	0.0681601	0.999947
BIOCARTA_DREAM_PATHWAY	10	0.0269329	Down	0.06826	0.999947
GO_EOSINOPHIL_ACTIVATION	4	0.0392036	Up	0.0682929	0.999947
PID_IL23_PATHWAY	22	0.0453884	Up	0.0685164	0.999947
GO_T_HELPER_1_CELL_CYTOKINE_PRODUCTION	5	-0.0649091	Up	0.0687152	0.999947
REACTOME_SIGNALING_BY_MRAS_COMPLEX_MUTANTS	8	0.0610135	Up	0.0688529	0.999947
GO_GLUTAMATE_BIOSYNTHETIC_PROCESS	4	0.0142233	Down	0.0690631	0.999947
REACTOME_MRNA_EDITING_C_TO_U_CONVERSION	3	0.0204196	Down	0.0690876	0.999947
WP_ENDOPLASMIC_RETICULUM_STRESS_RESPONSE_IN_CORONAVIRUS_INFECTION	44	0.0201914	Up	0.0691305	0.999947
GO_POSITIVE_REGULATION_OF_INTRINSIC_APOPTOTIC_SIGNALING_PATHWAY_BY_P53_CLASS_MEDIATOR	5	0.397218	Down	0.0691681	0.999947
GO_MITOCHONDRIAL_ELECTRON_TRANSPORT_UBIQUINOL_TO_CYTOCHROME_C	14	0.0944275	Down	0.0692342	0.999947
LEE_LIVER_CANCER_ACOX1_UP	56	0.0574689	Down	0.0693006	0.999947
GO_REGULATION_OF_NUCLEAR_TRANSCRIBED_MRNA_CATABOLIC_PROCESS_DEADENYLATION_DEPENDENT_DECAY	19	0.120059	Up	0.0693547	0.999947
SA_PROGRAMMED_CELL_DEATH	11	0.0475306	Up	0.0695012	0.999947
GO_NUCLEOSIDE_BISPHOSPHATE_CATABOLIC_PROCESS	5	0.0103512	Down	0.0695531	0.999947
GO_COMPLEMENT_BINDING	10	-0.014836	Down	0.0696093	0.999947
GO_CELLULAR_RESPIRATION	176	0.0461365	Down	0.0697565	0.999947
HP_SPASTIC_DIPLEGIA	28	0.0352141	Down	0.0698532	0.999947
GO_REGULATION_OF_SECONDARY_METABOLITE_BIOSYNTHETIC_PROCESS	7	0.02873	Up	0.0699108	0.999947
HP_BILATERAL_COXA_VALGA	9	-0.007028	Down	0.0699543	0.999947
FISCHER_G2_M_CELL_CYCLE	243	0.041365	Up	0.0700954	0.999947
GO_14_3_3_PROTEIN_BINDING	33	0.0195943	Up	0.0701199	0.999947
REACTOME_GDP_FUCOSE_BIOSYNTHESIS	7	-0.0343612	Down	0.0701861	0.999947
ZIRN_TRETINOIN_RESPONSE_UP	16	0.043549	Up	0.0702582	0.999947
GO_REGULATION_OF_TRANSLATIONAL_INITIATION_BY_EIF2_ALPHA_PHOSPHORYLATION	10	0.102786	Up	0.0703276	0.999947
GO_TRANSLATIONAL_INITIATION	192	0.138829	Down	0.0703308	0.999947
GO_GERM_CELL_PROLIFERATION	3	0.124871	Down	0.070484	0.999947
REACTOME_RUNX3_REGULATES_BCL2L11_BIM_TRANSCRIPTION	5	0.0710113	Up	0.0705008	0.999947
GO_URETER_MORPHOGENESIS	4	-0.082834	Down	0.0705781	0.999947
BIOCARTA_GHRELIN_PATHWAY	5	0.158557	Up	0.07068	0.999947
GO_PROTEIN_K29_LINKED_DEUBIQUITINATION	5	0.0639563	Up	0.0710673	0.999947
KUROZUMI_RESPONSE_TO_ONCOCYTIC_VIRUS_AND_CYCLIC_RGD	3	-0.144536	Up	0.0712442	0.999947
GO_MEMBRANE_DISRUPTION_IN_OTHER_ORGANISM	3	-0.112764	Down	0.0713878	0.999947
GO_RIBONUCLEASE_P_ACTIVITY	14	0.0338676	Down	0.0715281	0.999947
GO_CELL_FATE_DETERMINATION	21	0.0491193	Down	0.0715777	0.999947
GO_REGULATION_OF_ADIPOSE_TISSUE_DEVELOPMENT	6	0.0257697	Up	0.0715988	0.999947
HP_WIDE_PUBIC_SYMPHYSIS	5	0.0203485	Down	0.0716009	0.999947
GO_MHC_CLASS_I_BIOSYNTHETIC_PROCESS	5	-0.0686603	Down	0.0716052	0.999947
GO_7SK_SNRNA_BINDING	7	0.081136	Down	0.0716234	0.999947
GO_ATP_SYNTHESIS_COUPLED_PROTON_TRANSPORT	25	0.11644	Down	0.0716323	0.999947
GO_STEROL_BINDING	43	0.042631	Up	0.0716823	0.999947
GO_EUKARYOTIC_TRANSLATION_INITIATION_FACTOR_2B_COMPLEX	6	-0.00905929	Down	0.0717005	0.999947
PETRETTO_LEFT_VENTRICLE_MASS_QTL_CIS_UP	3	-0.133197	Down	0.0717702	0.999947
REN_BOUND_BY_E2F	60	0.0301956	Up	0.0717802	0.999947
GO_REGULATION_OF_MYOBLAST_FUSION	16	0.00536755	Down	0.0718211	0.999947
GO_DETERMINATION_OF_DORSAL_VENTRAL_ASYMMETRY	7	-0.00752626	Down	0.071899	0.999947
HP_AORTIC_ARCH_ANEURYSM	17	0.0161679	Up	0.0719608	0.999947
GO_REGULATION_OF_CLATHRIN_DEPENDENT_ENDOCYTOSIS	14	0.0696115	Up	0.0719901	0.999947
GO_POSITIVE_REGULATION_OF_ESTABLISHMENT_OF_PROTEIN_LOCALIZATION_TO_TELOMERE	10	0.13292	Down	0.0720266	0.999947
GO_RESPONSE_TO_BMP	107	0.0430654	Up	0.0720457	0.999947
GO_CUPROUS_ION_BINDING	6	0.0391784	Down	0.0724429	0.999947
HP_RIGHT_VENTRICULAR_FAILURE	9	-0.0235872	Up	0.0724721	0.999947
DACOSTA_ERCC3_ALLELE_XPCS_VS_TTD_UP	18	0.0890131	Down	0.0725347	0.999947
GO_VENTRICULAR_SEPTUM_MORPHOGENESIS	35	0.111513	Up	0.0726384	0.999947
GO_MYOTUBE_DIFFERENTIATION_INVOLVED_IN_SKELETAL_MUSCLE_REGENERATION	5	0.131455	Down	0.0726661	0.999947
MAHADEVAN_IMATINIB_RESISTANCE_DN	7	-0.0437269	Up	0.0729261	0.999947
REACTOME_ERYTHROCYTES_TAKE_UP_CARBON_DIOXIDE_AND_RELEASE_OXYGEN	6	-0.0181403	Up	0.0729455	0.999947
HP_TIGER_TAIL_BANDING	6	0.130537	Down	0.0730478	0.999947
HP_ABNORMALITY_OF_THE_NASAL_BONE	5	0.0102517	Down	0.0730544	0.999947
GO_SPINAL_CORD_PATTERNING	8	-0.031973	Up	0.0730606	0.999947
ANDERSEN_LIVER_CANCER_KRT19_UP	42	0.0715733	Down	0.0730704	0.999947
WP_TRANSLATION_FACTORS	52	0.0545561	Down	0.0736271	0.999947
GRAHAM_NORMAL_QUIESCENT_VS_NORMAL_DIVIDING_DN	82	0.0343997	Up	0.0736541	0.999947
GO_NEGATIVE_REGULATION_OF_LIPID_LOCALIZATION	33	0.0313452	Up	0.0736885	0.999947
PUJANA_BREAST_CANCER_WITH_BRCA1_MUTATED_UP	54	0.0306983	Up	0.0737405	0.999947
VALK_AML_WITH_EVI1	18	0.0424361	Up	0.0737822	0.999947
GO_AMIDE_TRANSMEMBRANE_TRANSPORTER_ACTIVITY	50	0.0157891	Down	0.0737827	0.999947
GO_RAL_GTPASE_BINDING	15	0.020147	Up	0.0737969	0.999947
GO_PARKIN_MEDIATED_STIMULATION_OF_MITOPHAGY_IN_RESPONSE_TO_MITOCHONDRIAL_DEPOLARIZATION	6	0.0297153	Up	0.0738002	0.999947
GO_CAJAL_BODY	57	0.0323513	Down	0.0738213	0.999947
MARIADASON_RESPONSE_TO_CURCUMIN_SULINDAC_7	12	0.0442738	Down	0.0738853	0.999947
BOYLAN_MULTIPLE_MYELOMA_C_DN	51	0.0554836	Down	0.0739975	0.999947
CHUANG_OXIDATIVE_STRESS_RESPONSE_DN	10	0.0296569	Up	0.0740519	0.999947
GO_PROLINE_METABOLIC_PROCESS	8	0.0368342	Down	0.0740692	0.999947
GO_GLYCOGEN_BINDING	8	-0.00568295	Up	0.0741009	0.999947
GO_POSITIVE_REGULATION_OF_OXIDATIVE_STRESS_INDUCED_INTRINSIC_APOPTOTIC_SIGNALING_PATHWAY	5	-0.014297	Down	0.0741209	0.999947
GO_PROTEIN_LOCALIZATION_TO_NUCLEOPLASM	14	0.0797686	Down	0.0741222	0.999947
LUI_THYROID_CANCER_PAX8_PPARG_DN	46	0.141277	Down	0.0741852	0.999947
GO_RESPONSE_TO_PEPTIDOGLYCAN	8	0.0464	Up	0.0744672	0.999947
GO_REGULATION_OF_PROTEIN_LOCALIZATION_TO_NUCLEOLUS	8	0.055603	Down	0.0744801	0.999947
GO_PHOSPHODIESTERASE_I_ACTIVITY	5	0.00206405	Down	0.0745266	0.999947
GO_PROTEIN_TAG	11	0.178164	Down	0.0747558	0.999947
GO_CHEMOATTRACTANT_ACTIVITY	19	0.0109879	Down	0.0747746	0.999947
GO_NEGATIVE_REGULATION_OF_SMOOTHENED_SIGNALING_PATHWAY_INVOLVED_IN_DORSAL_VENTRAL_NEURAL_TUBE_PATTERNING	6	-0.0115859	Up	0.0747854	0.999947
GO_POSITIVE_REGULATION_OF_MUCUS_SECRETION	5	0.0261904	Down	0.074792	0.999947
GO_DEVELOPMENT_OF_SECONDARY_FEMALE_SEXUAL_CHARACTERISTICS	6	0.0189286	Down	0.0748613	0.999947
GO_ATG1_ULK1_KINASE_COMPLEX	8	0.188007	Up	0.0748713	0.999947
GO_EPITHELIAL_CELL_MATURATION	12	0.0570504	Up	0.0749146	0.999947
BIOCARTA_ATM_PATHWAY	20	0.0517095	Up	0.0750458	0.999947
LIU_CDX2_TARGETS_DN	7	0.111666	Down	0.0751412	0.999947
HP_AORTIC_VALVE_STENOSIS	52	0.0403244	Up	0.0751438	0.999947
GO_SODIUM_PROTON_ANTIPORTER_ACTIVITY	10	0.0318001	Up	0.0752181	0.999947
CHARAFE_BREAST_CANCER_BASAL_VS_MESENCHYMAL_UP	125	0.0825269	Up	0.0752272	0.999947
GO_NADH_DEHYDROGENASE_COMPLEX_ASSEMBLY	68	0.0497927	Down	0.0752381	0.999947
GO_NEGATIVE_REGULATION_OF_OXIDATIVE_STRESS_INDUCED_NEURON_INTRINSIC_APOPTOTIC_SIGNALING_PATHWAY	5	0.114633	Down	0.0752831	0.999947
GO_RAB_GUANYL_NUCLEOTIDE_EXCHANGE_FACTOR_ACTIVITY	31	0.0481163	Up	0.0752884	0.999947
GO_AEROBIC_ELECTRON_TRANSPORT_CHAIN	19	0.0570462	Down	0.0753556	0.999947
GO_PROTEIN_MATURATION_BY_PROTEIN_FOLDING	9	0.052022	Down	0.0754056	0.999947
KEGG_GLUTATHIONE_METABOLISM	40	0.0610687	Down	0.0754176	0.999947
GO_3_5_EXODEOXYRIBONUCLEASE_ACTIVITY	9	0.0333954	Down	0.0755884	0.999947
GO_SYMPATHETIC_NERVOUS_SYSTEM_DEVELOPMENT	10	0.0203918	Down	0.0756168	0.999947
SA_G2_AND_M_PHASES	9	0.0471406	Up	0.0757171	0.999947
GO_CARDIAC_PACEMAKER_CELL_DIFFERENTIATION	4	-0.0259263	Up	0.0757503	0.999947
GO_CARD_DOMAIN_BINDING	15	0.0391308	Up	0.0757808	0.999947
GO_GENERAL_TRANSCRIPTION_INITIATION_FACTOR_BINDING	46	0.0334909	Down	0.0758763	0.999947
GO_REGULATION_OF_CALCIUM_ION_IMPORT	26	0.0425784	Down	0.0758918	0.999947
WP_CARDIAC_PROGENITOR_DIFFERENTIATION	23	0.00594654	Down	0.0760907	0.999947
GO_REGULATION_OF_WATER_LOSS_VIA_SKIN	26	0.0767222	Up	0.076111	0.999947
REACTOME_ACTIVATED_NTRK2_SIGNALS_THROUGH_FRS2_AND_FRS3	10	0.0174416	Up	0.0761478	0.999947
GO_POSITIVE_REGULATION_OF_METALLOPEPTIDASE_ACTIVITY	7	0.031212	Up	0.076238	0.999947
GO_NASCENT_POLYPEPTIDE_ASSOCIATED_COMPLEX	3	0.0170708	Down	0.0762701	0.999947
GO_NEGATIVE_REGULATION_OF_CALCIUM_ION_TRANSPORT	37	0.0257239	Down	0.0763148	0.999947
GO_CELLULAR_RESPONSE_TO_CAFFEINE	7	0.00326428	Down	0.0763323	0.999947
GO_REGULATION_OF_PROTON_TRANSPORT	18	0.0542796	Down	0.0764892	0.999947
HP_INCREASED_HEPATOCELLULAR_LIPID_DROPLETS	12	0.0313623	Down	0.0765124	0.999947
HP_LIMB_MYOCLONUS	9	0.00787656	Down	0.0765489	0.999947
GO_CDC42_PROTEIN_SIGNAL_TRANSDUCTION	9	0.0857398	Up	0.0765629	0.999947
GO_SODIUM_PHOSPHATE_SYMPORTER_ACTIVITY	4	0.146315	Down	0.0766486	0.999947
HP_HODGKIN_LYMPHOMA	10	-0.0139556	Down	0.0766705	0.999947
GO_SNRNA_METABOLIC_PROCESS	37	0.0196771	Down	0.0767877	0.999947
HP_ABNORMALITY_OF_THE_AXILLARY_HAIR	33	0.037601	Down	0.0768069	0.999947
HALMOS_CEBPA_TARGETS_UP	41	0.0242279	Up	0.0768185	0.999947
GO_KERATIN_FILAMENT	23	0.139609	Up	0.0768999	0.999947
GO_POSITIVE_REGULATION_OF_EXTRINSIC_APOPTOTIC_SIGNALING_PATHWAY_IN_ABSENCE_OF_LIGAND	10	0.0630373	Down	0.0769964	0.999947
GO_NEGATIVE_REGULATION_OF_T_HELPER_CELL_DIFFERENTIATION	11	0.063043	Up	0.0770184	0.999947
GO_B_1_B_CELL_DIFFERENTIATION	3	0.128655	Down	0.077046	0.999947
GO_ARGININE_TRANSPORT	7	0.0534683	Up	0.0772051	0.999947
HP_GONADAL_DYSGENESIS	25	0.0737335	Down	0.0772337	0.999947
GO_NEGATIVE_REGULATION_OF_JUN_KINASE_ACTIVITY	11	0.106925	Down	0.0772452	0.999947
HP_AORTIC_DISSECTION	21	0.0261595	Up	0.0772734	0.999947
GO_LATERAL_PLASMA_MEMBRANE	58	0.0551334	Up	0.0773404	0.999947
GO_ASTER	11	0.0729078	Up	0.0773491	0.999947
TIEN_INTESTINE_PROBIOTICS_6HR_UP	53	0.216401	Down	0.0773719	0.999947
VANTVEER_BREAST_CANCER_METASTASIS_DN	106	0.0350598	Up	0.0773763	0.999947
GO_RNA_SURVEILLANCE	16	0.0173024	Down	0.0774464	0.999947
CASTELLANO_HRAS_AND_NRAS_TARGETS_DN	8	0.00081612	Up	0.0775084	0.999947
GO_C_METHYLTRANSFERASE_ACTIVITY	5	0.0600437	Down	0.0775696	0.999947
GO_PYRIMIDINE_NUCLEOSIDE_TRIPHOSPHATE_BIOSYNTHETIC_PROCESS	16	0.0613979	Down	0.0777469	0.999947
GO_TRICUSPID_VALVE_DEVELOPMENT	5	0.111071	Up	0.07785	0.999947
GO_TRICUSPID_VALVE_MORPHOGENESIS	5	0.111071	Up	0.07785	0.999947
GO_PROTON_TRANSPORTING_ATP_SYNTHASE_COMPLEX	21	0.121109	Down	0.0780179	0.999947
WIELAND_UP_BY_HBV_INFECTION	92	0.0119696	Down	0.0781083	0.999947
GO_DEFINITIVE_HEMOPOIESIS	16	0.0735072	Up	0.0782153	0.999947
GO_RETINOL_BINDING	9	0.0576083	Up	0.0782242	0.999947
GO_RRNA_CYTOSINE_METHYLTRANSFERASE_ACTIVITY	4	-0.0350237	Down	0.0782278	0.999947
GO_SPERM_EGG_RECOGNITION	33	0.0309183	Down	0.0782295	0.999947
GO_EXTRACELLULAR_MATRIX_CELL_SIGNALING	4	-0.00715613	Up	0.0782399	0.999947
GO_CYSTEINE_TYPE_ENDOPEPTIDASE_REGULATOR_ACTIVITY_INVOLVED_IN_APOPTOTIC_PROCESS	31	0.0333275	Down	0.0782567	0.999947
LUI_THYROID_CANCER_CLUSTER_3	27	0.178989	Down	0.0782946	0.999947
GO_DOUBLE_STRANDED_METHYLATED_DNA_BINDING	4	-0.099274	Down	0.0783642	0.999947
BIOCARTA_ARAP_PATHWAY	16	0.0725903	Up	0.0783921	0.999947
HP_SHORT_PROXIMAL_PHALANX_OF_FINGER	4	-0.0447689	Up	0.0785004	0.999947
GO_NEGATIVE_REGULATION_OF_ATPASE_ACTIVITY	15	0.0137336	Down	0.078503	0.999947
GO_CELLULAR_RESPONSE_TO_COLD	9	0.052166	Up	0.0785534	0.999947
GO_NUCLEOBASE_CONTAINING_SMALL_MOLECULE_BIOSYNTHETIC_PROCESS	94	0.0431721	Down	0.0785969	0.999947
HP_RECURRENT_BRONCHOPULMONARY_INFECTIONS	8	0.136938	Down	0.0786018	0.999947
LEE_TARGETS_OF_PTCH1_AND_SUFU_UP	49	0.0322796	Down	0.0786783	0.999947
GO_RESPONSE_TO_CGMP	4	-0.0381376	Up	0.0787709	0.999947
GO_MEIOTIC_COHESIN_COMPLEX	5	-0.0369422	Up	0.078862	0.999947
GO_CENTRAL_NERVOUS_SYSTEM_MATURATION	3	-0.0528078	Up	0.0789108	0.999947
GO_CHROMOSOME_MOVEMENT_TOWARDS_SPINDLE_POLE	6	0.0405732	Up	0.0790473	0.999947
GO_AMINE_BIOSYNTHETIC_PROCESS	16	0.0302767	Down	0.0791012	0.999947
SHEPARD_BMYB_TARGETS	58	0.0347274	Up	0.0791177	0.999947
GO_POSITIVE_REGULATION_OF_TRANSPORTER_ACTIVITY	69	0.0190744	Down	0.0791539	0.999947
REACTOME_CELL_CELL_COMMUNICATION	93	0.0842631	Up	0.0791548	0.999947
GO_CARDIOLIPIN_BIOSYNTHETIC_PROCESS	9	-0.0116195	Down	0.0791554	0.999947
HP_HYPOPLASIA_OF_THE_EAR_CARTILAGE	11	0.031525	Down	0.07927	0.999947
KOINUMA_COLON_CANCER_MSI_UP	12	0.072796	Down	0.0793034	0.999947
KANG_GLIS3_TARGETS	12	0.0062133	Down	0.0794392	0.999947
HP_LOW_LEVELS_OF_VITAMIN_D	6	0.0626681	Down	0.0795014	0.999947
GO_PLATELET_DERIVED_GROWTH_FACTOR_RECEPTOR_ALPHA_SIGNALING_PATHWAY	4	0.0759482	Up	0.0795348	0.999947
GO_REGULATION_OF_PLATELET_DERIVED_GROWTH_FACTOR_RECEPTOR_ALPHA_SIGNALING_PATHWAY	4	0.0759482	Up	0.0795348	0.999947
GO_CARDIAC_MUSCLE_TISSUE_MORPHOGENESIS	40	0.0549354	Up	0.0795374	0.999947
NAKAMURA_CANCER_MICROENVIRONMENT_UP	13	0.0235407	Down	0.0798314	0.999947
GO_TRANSLATION_REPRESSOR_ACTIVITY_MRNA_REGULATORY_ELEMENT_BINDING	15	0.0407241	Up	0.0799903	0.999947
BLANCO_MELO_BETA_INTERFERON_TREATED_BRONCHIAL_EPITHELIAL_CELLS_DN	194	0.0449554	Up	0.0801186	0.999947
GO_EPITHELIAL_CELL_PROLIFERATION_INVOLVED_IN_PROSTATE_GLAND_DEVELOPMENT	10	0.0423132	Down	0.0801693	0.999947
MCBRYAN_TERMINAL_END_BUD_DN	5	0.114101	Down	0.0802375	0.999947
GO_PYRIMIDINE_NUCLEOTIDE_BINDING	6	0.156381	Down	0.0802638	0.999947
GO_MITOTIC_CHROMOSOME_CONDENSATION	16	0.0324256	Up	0.0802866	0.999947
REACTOME_SIGNALING_BY_MAPK_MUTANTS	7	0.0516719	Down	0.0802967	0.999947
BOYLAN_MULTIPLE_MYELOMA_C_CLUSTER_UP	32	0.0243681	Up	0.0803162	0.999947
GO_PROTEASOME_REGULATORY_PARTICLE_LID_SUBCOMPLEX	7	0.00840933	Down	0.0803282	0.999947
HP_JUVENILE_MYELOMONOCYTIC_LEUKEMIA	6	0.0157509	Up	0.0807151	0.999947
GO_NEPHRON_TUBULE_FORMATION	14	-0.0128958	Down	0.0807437	0.999947
GO_SOMITE_ROSTRAL_CAUDAL_AXIS_SPECIFICATION	6	0.0351447	Up	0.0808076	0.999947
GO_REGULATION_OF_ESTABLISHMENT_OF_PROTEIN_LOCALIZATION_TO_CHROMOSOME	12	0.104122	Down	0.0809555	0.999947
GO_REGULATION_OF_NUCLEAR_TRANSCRIBED_MRNA_POLY_A_TAIL_SHORTENING	14	0.202058	Up	0.0810018	0.999947
GO_LIPID_EXPORT_FROM_CELL	26	0.0123191	Down	0.0810043	0.999947
KANG_DOXORUBICIN_RESISTANCE_DN	20	0.0743209	Up	0.0810252	0.999947
HP_CENTRAL_HYPOVENTILATION	11	0.043608	Down	0.0811347	0.999947
GO_POSITIVE_REGULATION_OF_CIRCADIAN_RHYTHM	8	0.0656599	Up	0.0812054	0.999947
WORSCHECH_TUMOR_EVASION_AND_TOLEROGENICITY_DN	12	0.0202523	Up	0.0813524	0.999947
GO_AEROBIC_RESPIRATION	80	0.0451694	Down	0.0814116	0.999947
FOURNIER_ACINAR_DEVELOPMENT_EARLY_DN	6	0.0525946	Down	0.0815249	0.999947
GO_REGULATION_OF_HISTONE_H3_K27_METHYLATION	9	0.0144565	Up	0.0815445	0.999947
GO_MITOTIC_SPINDLE_MIDZONE	13	0.0281791	Up	0.0815551	0.999947
GO_POSITIVE_REGULATION_OF_TRANSCRIPTION_OF_NOTCH_RECEPTOR_TARGET	16	0.0638473	Up	0.081567	0.999947
REACTOME_NTRK2_ACTIVATES_RAC1	4	-0.00286054	Up	0.0816529	0.999947
HP_MALNUTRITION	24	0.0136863	Down	0.0816691	0.999947
GO_PROTON_TRANSPORTING_TWO_SECTOR_ATPASE_COMPLEX_ASSEMBLY	13	-0.00299246	Down	0.0816772	0.999947
GO_ISOPEPTIDASE_ACTIVITY	19	0.0169644	Down	0.0816825	0.999947
GO_POSITIVE_REGULATION_OF_PROTEIN_MONOUBIQUITINATION	5	-0.0729924	Down	0.0817166	0.999947
GO_MITOCHONDRIAL_RIBOSOME_ASSEMBLY	6	0.0849528	Down	0.0817756	0.999947
GO_SKELETAL_MUSCLE_ACETYLCHOLINE_GATED_CHANNEL_CLUSTERING	9	-0.00940881	Up	0.0818137	0.999947
GO_NEGATIVE_REGULATION_OF_APOPTOTIC_PROCESS_INVOLVED_IN_DEVELOPMENT	4	-0.00664467	Down	0.0818357	0.999947
MCMURRAY_TP53_HRAS_COOPERATION_RESPONSE_DN	52	0.0423634	Up	0.0819466	0.999947
GO_PSEUDOURIDINE_SYNTHESIS	18	0.089272	Down	0.0819488	0.999947
HP_INFERTILITY	88	0.0113394	Down	0.0819918	0.999947
BIOCARTA_G2_PATHWAY	23	0.0437595	Up	0.0821044	0.999947
GO_MOTOR_BEHAVIOR	6	-0.0311918	Down	0.0821839	0.999947
GO_ARTERIAL_ENDOTHELIAL_CELL_DIFFERENTIATION	6	0.148325	Up	0.0821898	0.999947
HP_ABNORMALITY_OF_THE_INTRINSIC_PATHWAY	23	0.0319521	Down	0.0822064	0.999947
GO_SUBSTRATE_ADHESION_DEPENDENT_CELL_SPREADING	85	0.048129	Up	0.0822122	0.999947
REACTOME_SEALING_OF_THE_NUCLEAR_ENVELOPE_NE_BY_ESCRT_III	23	0.13177	Down	0.0822549	0.999947
GO_FIBROBLAST_ACTIVATION	9	0.0382079	Up	0.0822667	0.999947
REACTOME_MISCELLANEOUS_SUBSTRATES	6	-0.0307077	Up	0.082312	0.999947
NAKAMURA_LUNG_CANCER	6	0.0498144	Up	0.082397	0.999947
GO_POSITIVE_REGULATION_OF_CORTICOSTEROID_HORMONE_SECRETION	4	0.0523096	Down	0.0824459	0.999947
YAO_TEMPORAL_RESPONSE_TO_PROGESTERONE_CLUSTER_13	185	0.0580447	Down	0.0825033	0.999947
GO_PROTEIN_RETENTION_IN_GOLGI_APPARATUS	5	-0.0104915	Up	0.0825098	0.999947
HP_FACIAL_TELANGIECTASIA	12	0.00221183	Up	0.0825858	0.999947
HP_LIMITED_EXTRAOCULAR_MOVEMENTS	12	0.000719348	Down	0.0825902	0.999947
GO_RRNA_BASE_METHYLATION	10	0.0320346	Down	0.0826302	0.999947
HP_CEREBRAL_DYSMYELINATION	11	0.0387492	Down	0.0826376	0.999947
HP_SUBUNGUAL_HYPERKERATOSIS	4	-0.0357429	Up	0.0827646	0.999947
GO_CHORION_DEVELOPMENT	7	0.0696108	Up	0.0828021	0.999947
GO_FOLLICLE_STIMULATING_HORMONE_SECRETION	3	0.00239053	Down	0.0828343	0.999947
HP_PREMATURE_GRAYING_OF_HAIR	29	0.0160846	Down	0.0830294	0.999947
GO_REGULATION_OF_GLYCOGEN_CATABOLIC_PROCESS	6	-0.0259434	Up	0.0830803	0.999947
GO_PURINE_NUCLEOTIDE_SALVAGE	6	-0.0166875	Down	0.0830885	0.999947
REACTOME_ACTIVATION_OF_AMPK_DOWNSTREAM_OF_NMDARS	18	0.183653	Down	0.083111	0.999947
REACTOME_METABOLISM_OF_NUCLEOTIDES	88	0.0489721	Down	0.0832074	0.999947
TUOMISTO_TUMOR_SUPPRESSION_BY_COL13A1_UP	14	0.013736	Down	0.0832152	0.999947
HP_APLASIA_HYPOPLASIA_OF_THE_UTERUS	42	0.0497229	Down	0.0832733	0.999947
GO_AUDITORY_RECEPTOR_CELL_FATE_COMMITMENT	4	0.152677	Up	0.0832866	0.999947
GO_PROTON_TRANSPORTING_ATP_SYNTHASE_COMPLEX_CATALYTIC_CORE_F_1	6	0.078849	Down	0.0833256	0.999947
HP_HYPOTHALAMIC_GONADOTROPIN_RELEASING_HORMONE_DEFICIENCY	11	0.054269	Down	0.083372	0.999947
LIEN_BREAST_CARCINOMA_METAPLASTIC	21	0.0376625	Up	0.0833913	0.999947
SHANK_TAL1_TARGETS_DN	6	0.101424	Up	0.0836985	0.999947
GO_RNA_PHOSPHODIESTER_BOND_HYDROLYSIS	152	0.0352337	Down	0.0837202	0.999947
GO_MALE_MEIOSIS_I	14	-0.00337571	Down	0.0837343	0.999947
GO_SPHINGOLIPID_TRANSPORTER_ACTIVITY	11	0.0694621	Up	0.0837878	0.999947
GO_ESTABLISHMENT_OF_PROTEIN_LOCALIZATION_TO_MITOCHONDRIAL_MEMBRANE	52	0.0267725	Down	0.0837977	0.999947
REACTOME_CELLULAR_HEXOSE_TRANSPORT	11	0.0600417	Up	0.0839022	0.999947
ZHAN_MULTIPLE_MYELOMA_LB_DN	32	0.012803	Down	0.0839394	0.999947
BILBAN_B_CLL_LPL_UP	57	0.0193422	Up	0.0840051	0.999947
REACTOME_FORMATION_OF_FIBRIN_CLOT_CLOTTING_CASCADE_	13	0.0308092	Down	0.0840241	0.999947
GO_PYRIMIDINE_NUCLEOTIDE_BIOSYNTHETIC_PROCESS	26	0.0272382	Down	0.0840486	0.999947
IIZUKA_LIVER_CANCER_PROGRESSION_L0_L1_DN	20	0.0975224	Down	0.0840787	0.999947
GO_AUTOPHAGIC_CELL_DEATH	10	0.134704	Up	0.0841314	0.999947
GO_NEGATIVE_REGULATION_OF_NEUROTRANSMITTER_SECRETION	8	0.0357604	Down	0.0841705	0.999947
NIKOLSKY_BREAST_CANCER_15Q26_AMPLICON	17	0.0272274	Up	0.0842783	0.999947
HP_ABNORMAL_CORPUS_STRIATUM_MORPHOLOGY	30	0.00980521	Down	0.0843676	0.999947
BOWIE_RESPONSE_TO_EXTRACELLULAR_MATRIX	20	-0.00497153	Down	0.0843692	0.999947
ZHOU_CELL_CYCLE_GENES_IN_IR_RESPONSE_2HR	8	0.000275893	Up	0.0843784	0.999947
HP_DUODENAL_STENOSIS	25	-0.000152952	Up	0.0846537	0.999947
GO_NEGATIVE_REGULATION_OF_CHONDROCYTE_DIFFERENTIATION	14	-0.00853113	Down	0.0846793	0.999947
CASTELLANO_NRAS_TARGETS_DN	13	0.0479553	Up	0.0846891	0.999947
HP_APLASIA_HYPOPLASIA_OF_THE_TONGUE	30	0.011383	Down	0.0846952	0.999947
GO_MITOCHONDRIAL_RNA_MODIFICATION	9	0.111743	Down	0.0847745	0.999947
REACTOME_CELL_EXTRACELLULAR_MATRIX_INTERACTIONS	17	0.093481	Up	0.0848797	0.999947
ST_GA12_PATHWAY	20	0.0156678	Up	0.084948	0.999947
HP_ABNORMAL_METABOLISM	85	0.0292432	Down	0.08498	0.999947
HP_HYPOKETOTIC_HYPOGLYCEMIA	12	-0.00302293	Down	0.0850752	0.999947
GO_LACRIMAL_GLAND_DEVELOPMENT	4	0.140811	Down	0.0851884	0.999947
HP_PSEUDOEPIPHYSES	10	0.0722712	Up	0.085228	0.999947
HP_ELFIN_FACIES	10	0.0576279	Up	0.0854097	0.999947
GO_POSITIVE_REGULATION_OF_CELL_CELL_ADHESION_MEDIATED_BY_INTEGRIN	3	0.0441454	Up	0.085436	0.999947
GO_RESPONSE_TO_AMPHETAMINE	20	0.0112321	Down	0.0855972	0.999947
HP_APLASIA_HYPOPLASIA_OF_THE_EYELID	33	0.0174543	Down	0.0856477	0.999947
GO_REGULATION_OF_STEM_CELL_POPULATION_MAINTENANCE	29	0.0281808	Down	0.0857189	0.999947
GO_NEGATIVE_REGULATION_OF_NEURAL_PRECURSOR_CELL_PROLIFERATION	15	0.00932983	Up	0.085728	0.999947
HP_GLOSSOPTOSIS	19	0.0313788	Down	0.0857785	0.999947
GO_TRANSLATION_INITIATION_FACTOR_ACTIVITY	50	0.0667455	Down	0.0858356	0.999947
GO_REGULATION_OF_MESENCHYMAL_CELL_PROLIFERATION	23	0.00213296	Down	0.0858684	0.999947
GO_REPLICATION_BORN_DOUBLE_STRAND_BREAK_REPAIR_VIA_SISTER_CHROMATID_EXCHANGE	7	0.0174363	Up	0.0858732	0.999947
HP_LARYNGEAL_STENOSIS	12	0.076826	Down	0.0859922	0.999947
GO_INSULIN_LIKE_GROWTH_FACTOR_BINDING	16	0.186779	Up	0.0859932	0.999947
GO_AMINOGLYCOSIDE_ANTIBIOTIC_METABOLIC_PROCESS	8	0.134651	Down	0.0859965	0.999947
NAKAMURA_CANCER_MICROENVIRONMENT_DN	40	0.0441841	Up	0.0862704	0.999947
GO_PROTEIN_DENEDDYLATION	10	0.00829482	Down	0.0863392	0.999947
HP_CARCINOID_TUMOR	15	0.0331045	Up	0.0868006	0.999947
HP_RETICULATED_SKIN_PIGMENTATION	7	0.100558	Down	0.0868132	0.999947
GO_GTP_BIOSYNTHETIC_PROCESS	9	0.068727	Down	0.0869375	0.999947
DUTERTRE_ESTRADIOL_RESPONSE_6HR_DN	82	0.0421163	Up	0.0869376	0.999947
GO_POSITIVE_REGULATION_OF_AMPA_RECEPTOR_ACTIVITY	3	0.0635243	Down	0.0870087	0.999947
GO_TRANSLATION_TERMINATION_FACTOR_ACTIVITY	7	-0.00432371	Down	0.0870353	0.999947
HP_PHOCOMELIA	6	0.00116208	Down	0.0871112	0.999947
HP_ABNORMAL_CAUDATE_NUCLEUS_MORPHOLOGY	16	0.0132498	Down	0.087355	0.999947
GO_REGULATION_OF_TRANSCRIPTION_FROM_RNA_POLYMERASE_II_PROMOTER_INVOLVED_IN_HEART_DEVELOPMENT	4	0.13639	Up	0.0874684	0.999947
HP_SHORT_1ST_METACARPAL	14	0.00718289	Up	0.0874914	0.999947
ISHIDA_E2F_TARGETS	52	0.059153	Up	0.0876262	0.999947
JONES_TCOF1_TARGETS	5	0.127337	Up	0.0876353	0.999947
WP_CHOLESTEROL_BIOSYNTHESIS_PATHWAY	17	0.116337	Up	0.0876939	0.999947
MARZEC_IL2_SIGNALING_UP	97	0.0364721	Down	0.0877298	0.999947
HONMA_DOCETAXEL_RESISTANCE	38	0.096996	Down	0.0877444	0.999947
GO_TRABECULA_MORPHOGENESIS	40	0.0739151	Up	0.0879396	0.999947
GO_PROTEASOMAL_UBIQUITIN_INDEPENDENT_PROTEIN_CATABOLIC_PROCESS	23	0.0544576	Down	0.0880292	0.999947
GO_GLYCOSYL_COMPOUND_CATABOLIC_PROCESS	33	0.0494632	Down	0.0881274	0.999947
GO_POSITIVE_REGULATION_OF_HISTONE_H3_K9_METHYLATION	8	-0.00120048	Up	0.0881336	0.999947
GO_REGULATION_OF_ADENYLATE_CYCLASE_ACTIVATING_G_PROTEIN_COUPLED_RECEPTOR_SIGNALING_PATHWAY	9	0.0246596	Down	0.0882006	0.999947
GO_U1_SNRNP	18	0.0479462	Down	0.0882058	0.999947
HP_ABNORMAL_ACTIVITY_OF_MITOCHONDRIAL_RESPIRATORY_CHAIN	71	0.0511167	Down	0.088293	0.999947
HP_INCREASED_THYROID_STIMULATING_HORMONE_LEVEL	10	0.0559412	Up	0.0882933	0.999947
GO_POSITIVE_REGULATION_OF_ADENYLATE_CYCLASE_ACTIVATING_G_PROTEIN_COUPLED_RECEPTOR_SIGNALING_PATHWAY	4	0.0525952	Down	0.0884566	0.999947
BERENJENO_ROCK_SIGNALING_NOT_VIA_RHOA_UP	21	0.050874	Down	0.0886484	0.999947
GO_SNRNA_PROCESSING	26	0.0102702	Down	0.0886559	0.999947
GO_CGMP_BIOSYNTHETIC_PROCESS	3	-0.100596	Up	0.0886576	0.999947
GO_GUANYLATE_CYCLASE_ACTIVITY	3	-0.100596	Up	0.0886576	0.999947
GO_NEGATIVE_REGULATION_OF_CHOLESTEROL_STORAGE	8	-0.0104954	Up	0.0886645	0.999947
GO_NEURON_INTRINSIC_APOPTOTIC_SIGNALING_PATHWAY_IN_RESPONSE_TO_OXIDATIVE_STRESS	8	0.0730459	Down	0.0887248	0.999947
MOOTHA_HUMAN_MITODB_6_2002	415	0.0441135	Down	0.0888609	0.999947
GO_UBIQUITIN_PROTEIN_TRANSFERASE_REGULATOR_ACTIVITY	19	0.0562844	Down	0.0888659	0.999947
GO_PLATELET_DENSE_TUBULAR_NETWORK	7	0.0632174	Down	0.0888737	0.999947
GO_RIBONUCLEOSIDE_CATABOLIC_PROCESS	17	0.0416107	Down	0.0889199	0.999947
VANLOO_SP3_TARGETS_DN	69	0.0393033	Down	0.0889613	0.999947
GO_NEGATIVE_REGULATION_OF_HYPOXIA_INDUCED_INTRINSIC_APOPTOTIC_SIGNALING_PATHWAY	5	0.170408	Down	0.0890517	0.999947
ZHAN_MULTIPLE_MYELOMA_HP_UP	31	0.0118534	Down	0.0891812	0.999947
GO_REGULATION_OF_SEQUESTERING_OF_TRIGLYCERIDE	10	0.0569729	Up	0.0892007	0.999947
WANG_THOC1_TARGETS_DN	7	0.0729301	Down	0.0892282	0.999947
PID_PI3KCI_PATHWAY	40	0.0522058	Up	0.0892391	0.999947
GO_POSITIVE_REGULATION_OF_IMMUNOGLOBULIN_SECRETION	6	0.00945628	Up	0.0892895	0.999947
GO_TRANS_SYNAPTIC_SIGNALING_MODULATING_SYNAPTIC_TRANSMISSION	7	0.0599451	Up	0.0894049	0.999947
GO_RIBONUCLEOSIDE_TRIPHOSPHATE_BIOSYNTHETIC_PROCESS	63	0.0756025	Down	0.0894367	0.999947
GO_UBIQUITIN_LIKE_PROTEIN_CONJUGATING_ENZYME_ACTIVITY	39	0.0350521	Up	0.0894401	0.999947
HP_TONGUE_FASCICULATIONS	21	0.00226705	Down	0.0894945	0.999947
REACTOME_STING_MEDIATED_INDUCTION_OF_HOST_IMMUNE_RESPONSES	13	0.0203822	Down	0.0895051	0.999947
HP_TACHYPNEA	84	0.0078153	Down	0.0895346	0.999947
WANG_ESOPHAGUS_CANCER_PROGRESSION_UP	7	0.0333555	Up	0.08966	0.999947
GO_NEGATIVE_REGULATION_OF_PROTEIN_ACETYLATION	18	0.0316925	Down	0.0896682	0.999947
HP_NEOPLASM_OF_FATTY_TISSUE	38	0.0236768	Up	0.0896998	0.999947
HP_ABNORMAL_BRAINSTEM_MRI_SIGNAL_INTENSITY	41	0.0254507	Down	0.0898922	0.999947
GO_NEGATIVE_REGULATION_OF_BMP_SIGNALING_PATHWAY	30	0.0495463	Up	0.0900275	0.999947
MIKKELSEN_PARTIALLY_REPROGRAMMED_TO_PLURIPOTENCY	9	0.15083	Up	0.0901029	0.999947
GO_2FE_2S_CLUSTER_ASSEMBLY	5	0.0627443	Down	0.0901111	0.999947
HP_TIBIALIS_MUSCLE_WEAKNESS	4	0.19868	Up	0.0901885	0.999947
REACTOME_MITOCHONDRIAL_PROTEIN_IMPORT	65	0.0664404	Down	0.0902061	0.999947
BIOCARTA_TERT_PATHWAY	7	-0.0254302	Up	0.090286	0.999947
GO_METHYLOSOME	12	0.0901466	Down	0.0903471	0.999947
GO_NEGATIVE_REGULATION_OF_CELL_KILLING	30	0.0157964	Down	0.0904306	0.999947
GO_POSITIVE_REGULATION_OF_CGMP_MEDIATED_SIGNALING	4	-0.0329262	Down	0.0904871	0.999947
GO_CGMP_METABOLIC_PROCESS	7	0.0229542	Up	0.0905055	0.999947
GO_NEPHRIC_DUCT_DEVELOPMENT	10	-0.0206195	Down	0.090577	0.999947
GO_TRANSLATION_PREINITIATION_COMPLEX	18	0.0598731	Down	0.0905848	0.999947
GO_NEGATIVE_REGULATION_OF_RESPONSE_TO_REACTIVE_OXYGEN_SPECIES	13	0.0447668	Down	0.0905964	0.999947
HP_CHORDEE	8	0.0110567	Down	0.0905989	0.999947
GO_MINOR_GROOVE_OF_ADENINE_THYMINE_RICH_DNA_BINDING	5	0.137348	Down	0.0906027	0.999947
WHITESIDE_CISPLATIN_RESISTANCE_DN	16	0.143472	Down	0.0906119	0.999947
GO_REGULATION_OF_T_CELL_CYTOKINE_PRODUCTION	25	0.0243401	Up	0.0906998	0.999947
HP_NEONATAL_SHORT_LIMB_SHORT_STATURE	8	-0.001378	Down	0.0909545	0.999947
WP_MITOCHONDRIAL_COMPLEX_I_ASSEMBLY_MODEL_OXPHOS_SYSTEM	59	0.0513293	Down	0.0910782	0.999947
GO_PROTEIN_LOCALIZATION_TO_NUCLEAR_BODY	12	0.112397	Down	0.0912989	0.999947
GO_NUCLEOSIDE_PHOSPHATE_CATABOLIC_PROCESS	63	0.0354683	Down	0.0914686	0.999947
GO_METAL_ION_PROTON_ANTIPORTER_ACTIVITY	12	0.0365774	Up	0.0914991	0.999947
MARSHALL_VIRAL_INFECTION_RESPONSE_DN	18	0.0335316	Up	0.0915516	0.999947
GO_FUNGIFORM_PAPILLA_DEVELOPMENT	5	-0.0480964	Down	0.0915567	0.999947
GO_FUNGIFORM_PAPILLA_MORPHOGENESIS	5	-0.0480964	Down	0.0915567	0.999947
GO_DISACCHARIDE_METABOLIC_PROCESS	8	0.00799816	Up	0.0915616	0.999947
REACTOME_INTERLEUKIN_3_INTERLEUKIN_5_AND_GM_CSF_SIGNALING	37	0.0374258	Up	0.0915947	0.999947
GO_PRIMARY_MIRNA_BINDING	8	0.0255699	Up	0.0915952	0.999947
GO_POSITIVE_REGULATION_OF_HISTONE_H3_K27_METHYLATION	7	0.0189055	Up	0.0916032	0.999947
RASHI_RESPONSE_TO_IONIZING_RADIATION_1	35	0.051151	Down	0.0916527	0.999947
GO_THREONINE_TYPE_PEPTIDASE_ACTIVITY	28	0.0298547	Down	0.0916824	0.999947
HP_DEPOSITS_IMMUNOREACTIVE_TO_BETA_AMYLOID_PROTEIN	8	0.00342869	Up	0.0916987	0.999947
GO_POSITIVE_REGULATION_OF_STEM_CELL_PROLIFERATION	29	0.0551882	Down	0.0917587	0.999947
GO_SYNDECAN_BINDING	5	-0.0892382	Down	0.0917856	0.999947
HP_MACRODONTIA	19	0.0719613	Down	0.0918539	0.999947
GO_CRISTAE_FORMATION	35	0.085394	Down	0.0918865	0.999947
GO_PARANODAL_JUNCTION_ASSEMBLY	7	-0.0061633	Down	0.0919172	0.999947
GO_ENDOCYTIC_VESICLE_LUMEN	10	0.0425572	Down	0.0920149	0.999947
HP_IRREGULAR_MENSTRUATION	19	0.0743711	Down	0.0921774	0.999947
GO_FOREBRAIN_NEUROBLAST_DIVISION	3	0.165023	Up	0.0922071	0.999947
GO_NEGATIVE_REGULATION_OF_MULTI_ORGANISM_PROCESS	11	0.0376266	Down	0.0922746	0.999947
HP_IMPAIRED_OXIDATIVE_BURST	4	-0.00863923	Down	0.0922814	0.999947
GO_GLYCINE_METABOLIC_PROCESS	12	-0.0335207	Down	0.0923739	0.999947
GO_NEUROMUSCULAR_SYNAPTIC_TRANSMISSION	13	-0.00781717	Up	0.092383	0.999947
HP_THORACIC_KYPHOSIS	35	0.0286268	Down	0.0923852	0.999947
GO_CHORIONIC_TROPHOBLAST_CELL_DIFFERENTIATION	5	0.0458494	Up	0.0925977	0.999947
REACTOME_POSITIVE_EPIGENETIC_REGULATION_OF_RRNA_EXPRESSION	52	0.0479577	Down	0.0926071	0.999947
HP_CESSATION_OF_HEAD_GROWTH	6	0.0177085	Down	0.0928356	0.999947
NAKAMURA_METASTASIS_MODEL_DN	38	0.039608	Down	0.0928574	0.999947
FRASOR_RESPONSE_TO_SERM_OR_FULVESTRANT_DN	46	0.0287213	Up	0.0928969	0.999947
GO_REGULATION_OF_TRANSLATION_INITIATION_IN_RESPONSE_TO_ENDOPLASMIC_RETICULUM_STRESS	7	0.231084	Up	0.0931257	0.999947
CROMER_TUMORIGENESIS_DN	37	0.0319328	Up	0.0931649	0.999947
GO_NEGATIVE_REGULATION_OF_CELLULAR_RESPONSE_TO_VASCULAR_ENDOTHELIAL_GROWTH_FACTOR_STIMULUS	8	0.0867522	Down	0.0932431	0.999947
GO_HISTONE_METHYLTRANSFERASE_ACTIVITY_H3_K27_SPECIFIC	8	0.02138	Up	0.0934242	0.999947
GO_GUANYL_NUCLEOTIDE_EXCHANGE_FACTOR_COMPLEX	12	0.0130518	Up	0.0934669	0.999947
GO_NEGATIVE_REGULATION_OF_DENDRITIC_CELL_DIFFERENTIATION	4	-0.129936	Down	0.0935368	0.999947
SWEET_KRAS_ONCOGENIC_SIGNATURE	83	0.0692204	Down	0.0936056	0.999947
GO_PROTEIN_POLY_ADP_RIBOSYLATION	9	0.0187683	Up	0.0937545	0.999947
GO_REGULATION_OF_MESENCHYMAL_STEM_CELL_DIFFERENTIATION	4	-0.146432	Down	0.0937832	0.999947
GO_MESENCHYME_MORPHOGENESIS	34	0.0221337	Down	0.0938119	0.999947
GO_URETER_DEVELOPMENT	9	-0.0190154	Down	0.0940506	0.999947
BIOCARTA_SM_PATHWAY	14	0.0579594	Down	0.0940932	0.999947
REACTOME_RNA_POLYMERASE_III_TRANSCRIPTION	43	0.0408859	Down	0.0941059	0.999947
REACTOME_INTERLEUKIN_10_SIGNALING	25	0.0325821	Up	0.0942321	0.999947
GO_HAUS_COMPLEX	8	0.0154527	Down	0.0942589	0.999947
WP_INTRAFLAGELLAR_TRANSPORT_PROTEINS_BINDING_TO_DYNEIN	25	0.028929	Down	0.0942659	0.999947
GO_U2_SNRNP	19	0.0884891	Down	0.0943012	0.999947
GO_INTERLEUKIN_1_BINDING	6	0.047538	Up	0.0943092	0.999947
GO_PROTEIN_PHOSPHATASE_TYPE_1_COMPLEX	15	0.037254	Up	0.094365	0.999947
GO_EXORIBONUCLEASE_COMPLEX	26	0.0240901	Down	0.0944311	0.999947
HP_INCREASED_NUCHAL_TRANSLUCENCY	26	0.0212989	Up	0.0944506	0.999947
GO_TRANSLATION_REPRESSOR_ACTIVITY	24	0.0268231	Up	0.0945324	0.999947
CHUANG_OXIDATIVE_STRESS_RESPONSE_UP	31	0.0329487	Down	0.0945689	0.999947
BIOCARTA_STEM_PATHWAY	4	0.0222508	Up	0.0946123	0.999947
GO_TELOMERASE_RNA_BINDING	24	0.0310956	Down	0.0946297	0.999947
PARK_OSTEOBLAST_DIFFERENTIATION_BY_PHENYLAMIL_DN	4	-0.00629598	Down	0.09463	0.999947
GO_NEGATIVE_REGULATION_OF_CELL_FATE_COMMITMENT	5	-0.000487786	Down	0.0947972	0.999947
GO_OXIDATIVE_PHOSPHORYLATION	142	0.0678304	Down	0.0948158	0.999947
GO_CENTROSOME_SEPARATION	15	0.0065658	Up	0.0948484	0.999947
GO_NUCLEOBASE_METABOLIC_PROCESS	32	0.0200938	Down	0.0948588	0.999947
HOLLERN_PAPILLARY_BREAST_TUMOR	16	0.0536365	Up	0.0948589	0.999947
GO_DENSE_CORE_GRANULE_TRANSPORT	7	0.0340763	Up	0.094866	0.999947
CREIGHTON_ENDOCRINE_THERAPY_RESISTANCE_5	448	0.0460643	Up	0.0949016	0.999947
GO_METANEPHRIC_GLOMERULUS_DEVELOPMENT	6	-0.00775128	Down	0.095114	0.999947
HP_MULTIPLE_EPIPHYSEAL_DYSPLASIA	6	0.0642973	Down	0.0951158	0.999947
GO_NEGATIVE_REGULATION_OF_LIPID_STORAGE	18	0.0190336	Up	0.0951492	0.999947
HP_SUBMUCOUS_CLEFT_SOFT_PALATE	7	0.010172	Down	0.0952884	0.999947
GO_AROMATIC_AMINO_ACID_FAMILY_METABOLIC_PROCESS	22	0.039308	Down	0.0952885	0.999947
GO_NK_T_CELL_PROLIFERATION	4	0.0826588	Up	0.0953054	0.999947
WHITFIELD_CELL_CYCLE_S	135	0.035078	Up	0.0953219	0.999947
GO_OLIGOSACCHARYLTRANSFERASE_COMPLEX	13	0.049854	Down	0.095414	0.999947
REACTOME_REGULATION_OF_FOXO_TRANSCRIPTIONAL_ACTIVITY_BY_ACETYLATION	10	0.115298	Up	0.0955239	0.999947
WIERENGA_STAT5A_TARGETS_GROUP2	37	0.0512659	Up	0.0956138	0.999947
GO_INTERLEUKIN_2_RECEPTOR_BINDING	3	0.0506109	Down	0.0956414	0.999947
HP_ABNORMAL_DELIVERY	64	0.0108952	Down	0.0957095	0.999947
GO_OXIDOREDUCTASE_ACTIVITY_ACTING_ON_THE_CH_NH_GROUP_OF_DONORS_NAD_OR_NADP_AS_ACCEPTOR	18	0.0235958	Down	0.0957254	0.999947
GO_TRNA_TRANSPORT	35	0.0374388	Down	0.0957556	0.999947
KEGG_TGF_BETA_SIGNALING_PATHWAY	71	0.0330179	Up	0.095763	0.999947
GO_EPIDIDYMIS_DEVELOPMENT	4	0.296368	Down	0.095807	0.999947
GO_MUTSALPHA_COMPLEX_BINDING	7	-0.0147349	Down	0.0958317	0.999947
HP_HYPOPLASIA_OF_THE_IRIS	21	0.0260695	Down	0.0958399	0.999947
GO_METANEPHRIC_S_SHAPED_BODY_MORPHOGENESIS	3	-0.154131	Down	0.0958721	0.999947
WENG_POR_TARGETS_LIVER_DN	17	0.017501	Down	0.0959231	0.999947
MIKKELSEN_NPC_HCP_WITH_H3K27ME3	132	0.0230113	Up	0.0959531	0.999947
GO_PHOSPHATIDYLINOSITOL_PHOSPHATE_KINASE_ACTIVITY	14	0.0359551	Up	0.0959788	0.999947
GO_ENZYME_DIRECTED_RRNA_PSEUDOURIDINE_SYNTHESIS	6	0.225642	Down	0.0960696	0.999947
CHANG_IMMORTALIZED_BY_HPV31_DN	51	0.0400151	Up	0.096135	0.999947
HP_PROMINENT_ANTIHELIX	6	-0.00253693	Up	0.096419	0.999947
LEE_LIVER_CANCER_HEPATOBLAST	15	0.135995	Down	0.0964706	0.999947
GO_LIM_DOMAIN_BINDING	5	0.0824142	Up	0.0965798	0.999947
HP_OVARIAN_CARCINOMA	15	0.0151194	Up	0.0967518	0.999947
DAZARD_UV_RESPONSE_CLUSTER_G1	56	0.0921484	Down	0.0968035	0.999947
PAPASPYRIDONOS_UNSTABLE_ATEROSCLEROTIC_PLAQUE_UP	46	0.0442975	Down	0.0968465	0.999947
DAZARD_UV_RESPONSE_CLUSTER_G24	22	0.0450662	Up	0.0970958	0.999947
GO_REGULATION_OF_MALE_GONAD_DEVELOPMENT	6	0.0460723	Down	0.0972153	0.999947
GO_ENDORIBONUCLEASE_COMPLEX	35	0.0615575	Down	0.0973011	0.999947
HP_PULMONARY_OBSTRUCTION	55	0.00833164	Down	0.0974267	0.999947
GO_GLUTATHIONE_PEROXIDASE_ACTIVITY	14	0.142588	Down	0.0975015	0.999947
GO_NEGATIVE_REGULATION_OF_DNA_REPAIR	35	0.0183089	Down	0.0975708	0.999947
GO_TYROSINE_CATABOLIC_PROCESS	3	0.092322	Down	0.0975911	0.999947
REACTOME_TYROSINE_CATABOLISM	3	0.092322	Down	0.0975911	0.999947
HP_RETROCEREBELLAR_CYST	6	-0.0438897	Up	0.0976001	0.999947
LINDGREN_BLADDER_CANCER_CLUSTER_1_DN	341	0.0389484	Up	0.0976871	0.999947
HP_GENERALIZED_LIPODYSTROPHY	5	0.0161091	Down	0.0977445	0.999947
REACTOME_PTK6_REGULATES_CELL_CYCLE	6	0.0265874	Down	0.0977564	0.999947
GO_NUCLEOSIDE_CATABOLIC_PROCESS	24	0.0477054	Down	0.0978132	0.999947
GO_CONDENSED_CHROMOSOME_INNER_KINETOCHORE	5	0.0224106	Up	0.097866	0.999947
PEDERSEN_METASTASIS_BY_ERBB2_ISOFORM_3	17	0.0790549	Up	0.0979005	0.999947
REACTOME_DOWNSTREAM_SIGNAL_TRANSDUCTION	28	0.063118	Up	0.0982972	0.999947
GO_CYSTEINE_TYPE_EXOPEPTIDASE_ACTIVITY	5	0.0337599	Up	0.0983085	0.999947
HP_HYPERGRANULOSIS	11	0.000500085	Up	0.0983576	0.999947
GO_GAP_JUNCTION	18	0.053656	Down	0.098418	0.999947
HP_RIDGED_NAIL	23	0.0560755	Down	0.0986133	0.999947
HP_ADRENAL_OVERACTIVITY	19	0.0305273	Up	0.0987325	0.999947
GO_NUCLEOLAR_RIBONUCLEASE_P_COMPLEX	8	-0.0286575	Down	0.0987637	0.999947
GO_ASTRAL_MICROTUBULE_ORGANIZATION	10	0.145544	Up	0.0987982	0.999947
GO_SEX_CHROMATIN	7	-0.0708645	Up	0.0988146	0.999947
GO_CELLULAR_HYPOTONIC_RESPONSE	8	0.0879032	Up	0.0988681	0.999947
GO_REGULATION_OF_EXCRETION	7	0.127264	Down	0.0989236	0.999947
CROMER_METASTASIS_DN	77	0.141271	Down	0.0990178	0.999947
WP_MITOCHONDRIAL_CIII_ASSEMBLY	16	0.0984772	Down	0.0990273	0.999947
WIEMANN_TELOMERE_SHORTENING_AND_CHRONIC_LIVER_DAMAGE_DN	5	-0.0581271	Up	0.0990708	0.999947
GO_REGULATION_OF_FATTY_ACID_BIOSYNTHETIC_PROCESS	35	0.0233439	Up	0.09911	0.999947
NAKAYAMA_FRA2_TARGETS	45	0.0567581	Down	0.0992335	0.999947
GO_DORSAL_AORTA_DEVELOPMENT	9	0.149488	Up	0.099272	0.999947
REACTOME_SOS_MEDIATED_SIGNALLING	7	0.00552695	Up	0.0993111	0.999947
BIOCARTA_FLUMAZENIL_PATHWAY	3	0.0892696	Down	0.0993493	0.999947
GO_CHYLOMICRON_ASSEMBLY	5	0.0297709	Up	0.0993631	0.999947
HP_DECREASED_CIRCULATING_PROGESTERONE	6	0.065338	Down	0.099438	0.999947
GO_SEBACEOUS_GLAND_DEVELOPMENT	6	0.134902	Up	0.099466	0.999947
GO_REGULATION_OF_DENDRITIC_CELL_DIFFERENTIATION	12	-0.0055376	Down	0.0995241	0.999947
GROSS_HIF1A_TARGETS_DN	23	0.123536	Down	0.0995654	0.999947
SENESE_HDAC1_AND_HDAC2_TARGETS_DN	184	0.0364159	Up	0.0997339	0.999947
REACTOME_NEGATIVE_REGULATION_OF_TCF_DEPENDENT_SIGNALING_BY_WNT_LIGAND_ANTAGONISTS	8	0.0595873	Down	0.0997885	0.999947
CAFFAREL_RESPONSE_TO_THC_8HR_5_DN	13	0.115439	Down	0.0998166	0.999947
REACTOME_VIRAL_MESSENGER_RNA_SYNTHESIS	44	0.0356632	Down	0.0998658	0.999947
HP_DEFECTIVE_DNA_REPAIR_AFTER_ULTRAVIOLET_RADIATION_DAMAGE	12	0.0476094	Down	0.0998852	0.999947
GO_POTASSIUM_ION_ANTIPORTER_ACTIVITY	12	0.00835772	Up	0.0998944	0.999947
GO_DNA_REPAIR_COMPLEX_ASSEMBLY	6	-0.0219526	Up	0.0999419	0.999947
GO_BEHAVIORAL_RESPONSE_TO_NICOTINE	5	-0.0124271	Up	0.0999639	0.999947
HP_INCREASED_CIRCULATING_GONADOTROPIN_LEVEL	32	0.0312948	Down	0.100009	0.999947
HP_OPSOCLONUS	5	0.0314148	Up	0.100036	0.999947
BEIER_GLIOMA_STEM_CELL_UP	27	0.0279762	Up	0.100063	0.999947
PID_MYC_ACTIV_PATHWAY	77	0.0627087	Down	0.10011	0.999947
OSAWA_TNF_TARGETS	8	-0.0264181	Up	0.100139	0.999947
REACTOME_ACTIVATED_NTRK2_SIGNALS_THROUGH_FYN	5	0.0141363	Up	0.100149	0.999947
REACTOME_NECTIN_NECL_TRANS_HETERODIMERIZATION	6	0.174165	Up	0.10018	0.999947
GO_RESPIRATORY_ELECTRON_TRANSPORT_CHAIN	114	0.0573933	Down	0.100244	0.999947
GO_STRESS_INDUCED_PREMATURE_SENESCENCE	7	0.00849976	Up	0.100266	0.999947
HP_ARTERIOVENOUS_MALFORMATION	47	0.03802	Up	0.100279	0.999947
GO_THIOLESTER_HYDROLASE_ACTIVITY	38	0.0171391	Down	0.100364	0.999947
PETROVA_PROX1_TARGETS_UP	23	0.0417891	Up	0.100507	0.999947
GO_TOLL_LIKE_RECEPTOR_4_SIGNALING_PATHWAY	25	0.0232302	Up	0.100544	0.999947
GO_CELL_PROLIFERATION_IN_BONE_MARROW	5	0.0599069	Down	0.100657	0.999947
GO_POSITIVE_REGULATION_OF_CELL_PROLIFERATION_IN_BONE_MARROW	5	0.0599069	Down	0.100657	0.999947
GO_CELL_PROLIFERATION_INVOLVED_IN_KIDNEY_DEVELOPMENT	15	0.00971468	Down	0.100867	0.999947
GO_POSITIVE_REGULATION_OF_STEM_CELL_POPULATION_MAINTENANCE	7	0.0326551	Down	0.101053	0.999947
GO_PROLINE_BIOSYNTHETIC_PROCESS	6	-0.00522693	Down	0.101066	0.999947
ELVIDGE_HYPOXIA_BY_DMOG_DN	52	0.0658508	Down	0.10107	0.999947
GO_PEPTIDYL_HISTIDINE_MODIFICATION	11	-0.00398432	Down	0.101149	0.999947
GO_INTRINSIC_APOPTOTIC_SIGNALING_PATHWAY_IN_RESPONSE_TO_OSMOTIC_STRESS	6	0.0074664	Down	0.101178	0.999947
GO_NEGATIVE_REGULATION_OF_STEROL_TRANSPORT	7	0.0626654	Up	0.101388	0.999947
GO_PROTEIN_TRANSMEMBRANE_IMPORT_INTO_INTRACELLULAR_ORGANELLE	35	0.064532	Down	0.101509	0.999947
GO_POSITIVE_REGULATION_OF_CARDIAC_MUSCLE_CELL_PROLIFERATION	17	0.0842055	Up	0.101567	0.999947
TOMLINS_PROSTATE_CANCER_UP	48	0.0531444	Down	0.101731	0.999947
MATZUK_MATERNAL_EFFECT	3	-0.284096	Up	0.101739	0.999947
MALIK_REPRESSED_BY_ESTROGEN	12	0.0564117	Up	0.101739	0.999947
ABE_INNER_EAR	32	0.110413	Down	0.101793	0.999947
BRACHAT_RESPONSE_TO_CISPLATIN	19	0.1396	Up	0.101922	0.999947
GO_POSTSYNAPTIC_MEMBRANE_ASSEMBLY	6	-0.0231294	Up	0.101931	0.999947
HP_ABNORMALITY_OF_THE_SELLA_TURCICA	22	0.0131402	Up	0.102021	0.999947
WP_RETINOBLASTOMA_GENE_IN_CANCER	86	0.0473093	Up	0.1021	0.999947
HP_MINICORE_MYOPATHY	5	0.0268218	Up	0.102132	0.999947
KEGG_SPLICEOSOME	143	0.0430539	Down	0.102266	0.999947
PID_NETRIN_PATHWAY	30	0.0218262	Up	0.102379	0.999947
REACTOME_TFAP2_AP_2_FAMILY_REGULATES_TRANSCRIPTION_OF_GROWTH_FACTORS_AND_THEIR_RECEPTORS	9	0.102922	Up	0.10238	0.999947
GO_DENSE_BODY	5	0.021543	Up	0.102398	0.999947
WP_HEME_BIOSYNTHESIS	8	-0.00742341	Down	0.102425	0.999947
GO_POSITIVE_REGULATION_OF_CYCLIC_NUCLEOTIDE_PHOSPHODIESTERASE_ACTIVITY	4	0.157466	Down	0.102501	0.999947
REACTOME_ESTROGEN_BIOSYNTHESIS	5	0.0472593	Down	0.102595	0.999947
REACTOME_AMINE_LIGAND_BINDING_RECEPTORS	8	0.00109474	Down	0.102597	0.999947
GO_UBIQUITIN_DEPENDENT_PROTEIN_CATABOLIC_PROCESS_VIA_THE_MULTIVESICULAR_BODY_SORTING_PATHWAY	24	0.0520605	Up	0.102621	0.999947
GO_NUCLEAR_COHESIN_COMPLEX	3	-0.040961	Up	0.102673	0.999947
FOURNIER_ACINAR_DEVELOPMENT_LATE_UP	11	0.045494	Down	0.102685	0.999947
REACTOME_FOXO_MEDIATED_TRANSCRIPTION_OF_CELL_CYCLE_GENES	15	0.111354	Up	0.10269	0.999947
REACTOME_SIGNALING_BY_NTRK2_TRKB_	22	0.0580622	Up	0.102704	0.999947
GO_NEGATIVE_REGULATION_OF_MICROTUBULE_POLYMERIZATION	9	0.00795686	Up	0.102793	0.999947
BASSO_HAIRY_CELL_LEUKEMIA_DN	5	-0.0137919	Up	0.102814	0.999947
GO_LYMPHATIC_ENDOTHELIAL_CELL_DIFFERENTIATION	5	0.00594136	Up	0.102896	0.999947
YAO_TEMPORAL_RESPONSE_TO_PROGESTERONE_CLUSTER_0	64	0.041734	Up	0.102901	0.999947
GO_POSITIVE_REGULATION_OF_CELL_PROLIFERATION_INVOLVED_IN_KIDNEY_DEVELOPMENT	7	-0.0119433	Down	0.102946	0.999947
GO_MACROLIDE_BINDING	9	0.0407075	Down	0.102962	0.999947
HP_VAGINAL_FISTULA	21	0.0306598	Down	0.103002	0.999947
GO_BLOOD_VESSEL_ENDOTHELIAL_CELL_DIFFERENTIATION	9	0.144366	Up	0.103003	0.999947
GO_LIGAND_GATED_SODIUM_CHANNEL_ACTIVITY	7	0.0467256	Up	0.103044	0.999947
GO_NEGATIVE_REGULATION_OF_HOMOTYPIC_CELL_CELL_ADHESION	12	0.0871675	Down	0.103165	0.999947
HP_CARDIORESPIRATORY_ARREST	5	0.10259	Down	0.10317	0.999947
GO_LIPID_PHOSPHORYLATION	62	0.0338047	Up	0.103186	0.999947
DELASERNA_MYOD_TARGETS_UP	64	0.0583019	Up	0.10325	0.999947
HP_NUMEROUS_PIGMENTED_FRECKLES	8	0.0620667	Down	0.103359	0.999947
GO_URATE_METABOLIC_PROCESS	5	0.109761	Down	0.103379	0.999947
WP_BENZOAPYRENE_METABOLISM	7	0.104538	Down	0.103442	0.999947
GO_U2_TYPE_SPLICEOSOMAL_COMPLEX	96	0.0396214	Down	0.103572	0.999947
GO_NEGATIVE_REGULATION_OF_INTRINSIC_APOPTOTIC_SIGNALING_PATHWAY_IN_RESPONSE_TO_DNA_DAMAGE	30	0.0140208	Down	0.103606	0.999947
GO_BASIC_AMINO_ACID_TRANSMEMBRANE_TRANSPORT	8	0.0741163	Up	0.103645	0.999947
HP_TICS	13	0.0398735	Up	0.103656	0.999947
LIU_IL13_PRIMING_MODEL	14	0.0538802	Down	0.103658	0.999947
GO_TRNA_METHYLTRANSFERASE_COMPLEX	5	0.160086	Down	0.103677	0.999947
GO_PHOSPHATIDYLINOSITOL_3_KINASE_ACTIVITY	9	0.0526072	Up	0.103705	0.999947
GO_SPLICEOSOMAL_TRI_SNRNP_COMPLEX	35	0.0341386	Down	0.103705	0.999947
KEGG_PROPANOATE_METABOLISM	29	0.0232472	Down	0.103729	0.999947
GO_SNORNA_3_END_PROCESSING	13	0.00869924	Down	0.103817	0.999947
GO_PHOSPHORYLATED_CARBOHYDRATE_DEPHOSPHORYLATION	15	0.000166711	Up	0.103822	0.999947
GO_RAS_GUANYL_NUCLEOTIDE_EXCHANGE_FACTOR_ACTIVITY	103	0.0337666	Up	0.103889	0.999947
GO_POSITIVE_REGULATION_OF_HORMONE_BIOSYNTHETIC_PROCESS	8	0.00931157	Down	0.104018	0.999947
PID_BMP_PATHWAY	37	0.0534286	Up	0.104086	0.999947
GO_GUANOSINE_CONTAINING_COMPOUND_BIOSYNTHETIC_PROCESS	12	0.0604772	Down	0.104106	0.999947
GO_NEGATIVE_REGULATION_OF_SMAD_PROTEIN_COMPLEX_ASSEMBLY	3	-0.087555	Up	0.104128	0.999947
HP_ABNORMALITY_OF_THE_1ST_METACARPAL	21	0.0169129	Up	0.104224	0.999947
BIOCARTA_MHC_PATHWAY	20	0.00550286	Down	0.104431	0.999947
HP_LACK_OF_SKIN_ELASTICITY	32	0.0412177	Up	0.104469	0.999947
GO_RAB_PROTEIN_SIGNAL_TRANSDUCTION	17	0.035971	Up	0.104484	0.999947
HP_HORIZONTAL_NYSTAGMUS	41	0.0133541	Down	0.10449	0.999947
GO_REGULATION_OF_TRIGLYCERIDE_CATABOLIC_PROCESS	6	-0.0195144	Up	0.104598	0.999947
GO_HYDROXYMETHYL_FORMYL_AND_RELATED_TRANSFERASE_ACTIVITY	9	-0.0424205	Down	0.104598	0.999947
WP_METHIONINE_DE_NOVO_AND_SALVAGE_PATHWAY	21	0.0272076	Down	0.104631	0.999947
BIOCARTA_S1P_PATHWAY	8	0.101605	Up	0.104743	0.999947
GO_NEGATIVE_REGULATION_OF_PEPTIDYL_LYSINE_ACETYLATION	16	0.0331819	Down	0.104769	0.999947
GO_RRNA_3_END_PROCESSING	10	0.0267404	Down	0.104808	0.999947
GO_SARCOPLASMIC_RETICULUM_CALCIUM_ION_TRANSPORT	21	0.0288092	Down	0.104836	0.999947
HP_ABNORMAL_PULMONARY_VALVE_MORPHOLOGY	51	0.0510555	Up	0.104846	0.999947
GO_PURINE_CONTAINING_COMPOUND_SALVAGE	13	0.0652444	Down	0.104908	0.999947
HP_ABNORMAL_CIRCULATING_CARBOHYDRATE_CONCENTRATION	53	0.0406688	Down	0.104922	0.999947
HP_CLUBBING_OF_TOES	29	-0.000469921	Up	0.104933	0.999947
PID_IL2_STAT5_PATHWAY	20	0.055636	Up	0.105032	0.999947
GO_TELOMERASE_HOLOENZYME_COMPLEX	19	0.0568744	Down	0.105083	0.999947
GO_SOMATIC_STEM_CELL_POPULATION_MAINTENANCE	57	0.0386672	Down	0.105112	0.999947
GO_LAMIN_FILAMENT	5	0.0643089	Down	0.105202	0.999947
GO_HORMONE_ACTIVITY	26	0.000240625	Down	0.105379	0.999947
GO_CD4_POSITIVE_ALPHA_BETA_T_CELL_ACTIVATION	63	0.040317	Up	0.105492	0.999947
GO_MULTICELLULAR_ORGANISM_AGING	28	0.00604498	Down	0.105492	0.999947
HP_TYPE_I_TRANSFERRIN_ISOFORM_PROFILE	17	0.0268661	Down	0.105508	0.999947
BIOCARTA_ALK_PATHWAY	28	0.0475594	Up	0.105524	0.999947
HP_DECREASED_ACTIVITY_OF_MITOCHONDRIAL_COMPLEX_I	41	0.0476991	Down	0.105551	0.999947
GO_NEURON_DEATH_IN_RESPONSE_TO_OXIDATIVE_STRESS	27	0.0406607	Down	0.105573	0.999947
GO_PROTEIN_LOCALIZATION_TO_GOLGI_APPARATUS	26	0.0619531	Up	0.105635	0.999947
HP_DECREASED_MEAN_CORPUSCULAR_VOLUME	8	-0.0337218	Down	0.105696	0.999947
HP_THICKENING_OF_THE_GLOMERULAR_BASEMENT_MEMBRANE	5	-0.0733532	Up	0.105701	0.999947
HP_ABNORMAL_C_PEPTIDE_LEVEL	9	-0.0281142	Up	0.105715	0.999947
GENTILE_UV_RESPONSE_CLUSTER_D8	37	0.0924048	Up	0.105731	0.999947
GO_BASAL_DENDRITE	4	0.0029589	Up	0.105741	0.999947
GO_PROLACTIN_SECRETION	5	-0.0372155	Up	0.105783	0.999947
MEBARKI_HCC_PROGENITOR_FZD8CRD_UP	483	0.0263302	Up	0.105786	0.999947
CASORELLI_APL_SECONDARY_VS_DE_NOVO_UP	36	0.00985532	Down	0.105811	0.999947
WP_HISTONE_MODIFICATIONS	41	0.0545451	Up	0.105817	0.999947
GO_ATP_SYNTHESIS_COUPLED_ELECTRON_TRANSPORT	97	0.0633558	Down	0.10584	0.999947
YAO_TEMPORAL_RESPONSE_TO_PROGESTERONE_CLUSTER_14	142	0.062222	Down	0.105963	0.999947
ZHU_CMV_8_HR_UP	38	0.0181955	Down	0.106038	0.999947
HP_MIDLINE_DEFECT_OF_THE_NOSE	11	0.00897042	Down	0.106069	0.999947
GO_EPITHELIAL_CELL_MORPHOGENESIS	28	0.0741737	Up	0.106124	0.999947
GO_INTRINSIC_COMPONENT_OF_MITOCHONDRIAL_MEMBRANE	80	0.0386989	Down	0.106143	0.999947
SAGIV_CD24_TARGETS_UP	20	0.0393745	Up	0.10616	0.999947
BIOCARTA_RARRXR_PATHWAY	7	0.0767243	Up	0.106164	0.999947
LUI_THYROID_CANCER_CLUSTER_5	10	0.0227439	Down	0.106167	0.999947
GO_CEREBRAL_CORTEX_GABAERGIC_INTERNEURON_DIFFERENTIATION	4	0.0371181	Up	0.106375	0.999947
HALLMARK_HEDGEHOG_SIGNALING	26	0.0670197	Up	0.106385	0.999947
HP_VITREOUS_HEMORRHAGE	9	0.0485215	Up	0.106423	0.999947
HP_TRACHEOBRONCHOMALACIA	6	0.0651614	Down	0.106553	0.999947
GO_ACETYLCHOLINE_RECEPTOR_ACTIVITY	8	0.00722187	Up	0.106661	0.999947
OLSSON_E2F3_TARGETS_DN	31	0.0565513	Up	0.106677	0.999947
GO_NUCLEOLAR_LARGE_RRNA_TRANSCRIPTION_BY_RNA_POLYMERASE_I	15	0.0352698	Down	0.106719	0.999947
REACTOME_NICOTINATE_METABOLISM	28	0.0286722	Down	0.106776	0.999947
GO_POSITIVE_REGULATION_OF_DNA_DAMAGE_RESPONSE_SIGNAL_TRANSDUCTION_BY_P53_CLASS_MEDIATOR	15	0.00526357	Down	0.106855	0.999947
REACTOME_SERINE_BIOSYNTHESIS	8	0.0797244	Up	0.106859	0.999947
GO_PROTON_TRANSPORTING_ATP_SYNTHASE_COMPLEX_ASSEMBLY	8	-0.00240834	Down	0.106871	0.999947
GO_CD4_POSITIVE_ALPHA_BETA_T_CELL_CYTOKINE_PRODUCTION	12	0.0238774	Up	0.107115	0.999947
GO_REGULATION_OF_NAD_P_H_OXIDASE_ACTIVITY	6	0.11735	Down	0.107162	0.999947
GO_POSITIVE_REGULATION_OF_MITOCHONDRIAL_DEPOLARIZATION	7	0.0598433	Down	0.107274	0.999947
KYNG_DNA_DAMAGE_BY_4NQO_OR_GAMMA_RADIATION	15	-0.0115183	Down	0.107324	0.999947
GO_AXON_GUIDANCE_RECEPTOR_ACTIVITY	4	-0.0103108	Up	0.107344	0.999947
VALK_AML_CLUSTER_7	17	0.0339052	Up	0.107345	0.999947
GO_T_CELL_ACTIVATION_INVOLVED_IN_IMMUNE_RESPONSE	55	0.0143904	Up	0.107366	0.999947
GO_NEGATIVE_REGULATION_OF_TRANSLATIONAL_ELONGATION	5	-0.0723636	Up	0.107421	0.999947
GO_LACTATION	42	0.0189481	Down	0.107756	0.999947
TIEN_INTESTINE_PROBIOTICS_2HR_UP	31	0.165919	Down	0.107884	0.999947
GO_BASAL_TRANSCRIPTION_MACHINERY_BINDING	56	0.0330238	Down	0.107988	0.999947
GO_PROTEIN_KINASE_C_SIGNALING	27	-0.00278863	Up	0.108152	0.999947
GO_NEGATIVE_REGULATION_OF_RYANODINE_SENSITIVE_CALCIUM_RELEASE_CHANNEL_ACTIVITY	8	0.0882529	Down	0.10816	0.999947
GO_KINESIN_COMPLEX	45	0.0479655	Up	0.108217	0.999947
HP_INCREASED_CSF_LACTATE	90	0.0514519	Down	0.10827	0.999947
REACTOME_CELL_JUNCTION_ORGANIZATION	66	0.102443	Up	0.10846	0.999947
CHIANG_LIVER_CANCER_SUBCLASS_PROLIFERATION_UP	172	0.0364945	Up	0.108508	0.999947
FUJIWARA_PARK2_IN_LIVER_CANCER_DN	5	-0.011656	Up	0.108535	0.999947
HP_INTESTINAL_PSEUDO_OBSTRUCTION	21	0.0419001	Up	0.108814	0.999947
GO_MAINTENANCE_OF_DNA_METHYLATION	7	-0.0505074	Down	0.108862	0.999947
GO_REGULATION_OF_PODOSOME_ASSEMBLY	14	0.0447308	Down	0.10891	0.999947
GO_REGULATION_OF_INTRINSIC_APOPTOTIC_SIGNALING_PATHWAY_IN_RESPONSE_TO_DNA_DAMAGE	38	0.0185785	Down	0.108956	0.999947
HP_ABNORMAL_CIRCULATING_PROLINE_CONCENTRATION	7	0.0317148	Down	0.108966	0.999947
GO_OXIDOREDUCTASE_ACTIVITY_ACTING_ON_DIPHENOLS_AND_RELATED_SUBSTANCES_AS_DONORS	9	0.0926066	Down	0.10901	0.999947
GO_MICROTUBULE_ORGANIZING_CENTER_LOCALIZATION	32	0.067349	Up	0.109034	0.999947
WP_PRADERWILLI_AND_ANGELMAN_SYNDROME	43	0.009679	Up	0.109067	0.999947
GO_MRNA_TRANSCRIPTION	16	0.0745233	Up	0.109088	0.999947
GO_REGULATION_OF_COLLAGEN_FIBRIL_ORGANIZATION	3	0.110419	Up	0.109169	0.999947
GO_ARRESTIN_FAMILY_PROTEIN_BINDING	7	0.0249503	Down	0.109301	0.999947
HP_NON_OBSTRUCTIVE_AZOOSPERMIA	17	-0.00320498	Down	0.109357	0.999947
HP_LEUKODYSTROPHY	95	0.0401211	Down	0.109373	0.999947
HP_AXONAL_LOSS	12	0.0536193	Down	0.109478	0.999947
HP_TYPE_2_MUSCLE_FIBER_ATROPHY	8	0.00999449	Down	0.109505	0.999947
GO_FERRIC_IRON_BINDING	6	0.0817519	Down	0.109525	0.999947
GO_PEPTIDE_TRANSMEMBRANE_TRANSPORTER_ACTIVITY	38	0.0226067	Down	0.109666	0.999947
GO_DELTA_CATENIN_BINDING	6	-0.0110678	Up	0.109741	0.999947
GO_MACROPHAGE_INFLAMMATORY_PROTEIN_1_ALPHA_PRODUCTION	4	0.0103057	Up	0.109849	0.999947
GO_LUNG_SACCULE_DEVELOPMENT	7	0.0290003	Up	0.10996	0.999947
LUND_SILENCED_BY_METHYLATION	14	0.146992	Down	0.109977	0.999947
COLLER_MYC_TARGETS_DN	4	0.121454	Up	0.110037	0.999947
ACOSTA_PROLIFERATION_INDEPENDENT_MYC_TARGETS_UP	81	0.0477827	Down	0.110063	0.999947
GO_POSITIVE_REGULATION_OF_UBIQUITIN_PROTEIN_LIGASE_ACTIVITY	14	0.0657467	Up	0.110072	0.999947
REACTOME_NUCLEOBASE_CATABOLISM	30	0.0530048	Down	0.110075	0.999947
GO_MAMMALIAN_OOGENESIS_STAGE	4	-0.0045147	Up	0.110169	0.999947
GO_REGULATION_OF_MEIOTIC_CELL_CYCLE	35	0.0457284	Up	0.110197	0.999947
GO_ALVEOLAR_LAMELLAR_BODY	5	0.0113489	Down	0.110197	0.999947
GO_NEGATIVE_REGULATION_OF_SMOOTHENED_SIGNALING_PATHWAY	28	0.0307265	Up	0.110379	0.999947
REACTOME_THE_CITRIC_ACID_TCA_CYCLE_AND_RESPIRATORY_ELECTRON_TRANSPORT	169	0.0550656	Down	0.11063	0.999947
WILLIAMS_ESR1_TARGETS_DN	6	0.0679753	Up	0.110782	0.999947
HP_PRELINGUAL_SENSORINEURAL_HEARING_IMPAIRMENT	6	-0.0774785	Down	0.110809	0.999947
GO_FERROUS_IRON_BINDING	19	0.00448212	Down	0.110894	0.999947
REACTOME_REGULATION_OF_INNATE_IMMUNE_RESPONSES_TO_CYTOSOLIC_DNA	12	0.00784825	Down	0.110978	0.999947
CHEMNITZ_RESPONSE_TO_PROSTAGLANDIN_E2_DN	336	0.0343546	Up	0.110991	0.999947
HP_PROGRESSIVE_VISUAL_FIELD_DEFECTS	4	-0.0549535	Down	0.11102	0.999947
GO_POSITIVE_REGULATION_OF_REPRODUCTIVE_PROCESS	52	0.0151052	Down	0.111074	0.999947
GO_NEGATIVE_REGULATION_OF_MACROPHAGE_DERIVED_FOAM_CELL_DIFFERENTIATION	9	-0.00814537	Up	0.111101	0.999947
ZHENG_IL22_SIGNALING_DN	24	0.0244795	Up	0.111121	0.999947
GO_INNER_CELL_MASS_CELL_DIFFERENTIATION	4	0.0450005	Down	0.111129	0.999947
GO_POSITIVE_REGULATION_OF_MEIOTIC_CELL_CYCLE	18	0.0242156	Up	0.111131	0.999947
GO_STEROL_ESTERASE_ACTIVITY	7	0.0505883	Up	0.111197	0.999947
SCIAN_INVERSED_TARGETS_OF_TP53_AND_TP73_DN	30	0.0561915	Up	0.111242	0.999947
HP_PROMINENT_SCALP_VEINS	5	0.014826	Down	0.111337	0.999947
GO_POSITIVE_REGULATION_OF_WOUND_HEALING	42	0.069056	Up	0.11134	0.999947
GO_RIBONUCLEOTIDE_CATABOLIC_PROCESS	27	0.0292348	Down	0.111477	0.999947
WP_METABOLISM_OF_ALPHALINOLENIC_ACID	4	-0.0157013	Down	0.111695	0.999947
GO_NEGATIVE_REGULATION_OF_NATURAL_KILLER_CELL_MEDIATED_IMMUNITY	27	0.00963424	Down	0.11174	0.999947
GO_POSITIVE_REGULATION_OF_MONONUCLEAR_CELL_MIGRATION	17	0.0220207	Down	0.111797	0.999947
GO_SMOOTHENED_SIGNALING_PATHWAY_INVOLVED_IN_DORSAL_VENTRAL_NEURAL_TUBE_PATTERNING	13	0.00342646	Up	0.111872	0.999947
NAKAMURA_METASTASIS_MODEL_UP	39	0.102055	Down	0.111881	0.999947
SCHEIDEREIT_IKK_TARGETS	16	0.0885189	Up	0.111996	0.999947
HOLLEMAN_VINCRISTINE_RESISTANCE_B_ALL_UP	40	0.0462353	Up	0.112029	0.999947
GO_NITRIC_OXIDE_MEDIATED_SIGNAL_TRANSDUCTION	16	0.0271182	Down	0.112139	0.999947
WP_PATHWAYS_AFFECTED_IN_ADENOID_CYSTIC_CARCINOMA	61	0.0428587	Up	0.112141	0.999947
HP_APLASIA_OF_THE_UTERUS	12	0.0518618	Down	0.112199	0.999947
PHONG_TNF_TARGETS_DN	7	0.172881	Up	0.112288	0.999947
HP_FACIAL_CLEFT	14	0.0697749	Down	0.112512	0.999947
BILD_MYC_ONCOGENIC_SIGNATURE	199	0.0551849	Down	0.112589	0.999947
GO_REGULATION_OF_GAMMA_DELTA_T_CELL_DIFFERENTIATION	5	0.0317634	Down	0.112698	0.999947
GO_TRAIL_BINDING	5	0.0883102	Down	0.112757	0.999947
GO_HISTONE_LYSINE_N_METHYLTRANSFERASE_ACTIVITY	45	0.0555249	Up	0.1129	0.999947
GHANDHI_DIRECT_IRRADIATION_DN	30	0.0161017	Up	0.11299	0.999947
HP_NEOPLASM_OF_THE_PARATHYROID_GLAND	14	0.0313022	Up	0.113052	0.999947
GO_FOLIC_ACID_METABOLIC_PROCESS	20	0.0126752	Down	0.11324	0.999947
ZWANG_EGF_PERSISTENTLY_UP	29	0.0647232	Up	0.113255	0.999947
GO_AXIS_ELONGATION_INVOLVED_IN_SOMITOGENESIS	3	-0.0244714	Down	0.113276	0.999947
GO_RESPONSE_TO_PLATELET_DERIVED_GROWTH_FACTOR	17	0.0353059	Up	0.113593	0.999947
SENESE_HDAC3_TARGETS_DN	491	0.0409468	Up	0.113964	0.999947
GO_NEGATIVE_REGULATION_OF_SINGLE_STRANDED_VIRAL_RNA_REPLICATION_VIA_DOUBLE_STRANDED_DNA_INTERMEDIATE	15	0.0274472	Down	0.114214	0.999947
GO_MRNA_TRANSCRIPTION_BY_RNA_POLYMERASE_II	10	0.116511	Up	0.11424	0.999947
REACTOME_CLASS_B_2_SECRETIN_FAMILY_RECEPTORS_	42	0.0237912	Up	0.114269	0.999947
TONKS_TARGETS_OF_RUNX1_RUNX1T1_FUSION_MONOCYTE_DN	37	0.0250616	Down	0.114272	0.999947
GO_POSITIVE_REGULATION_OF_PHOSPHOLIPID_TRANSPORT	7	0.0800991	Down	0.114358	0.999947
HP_LYMPHEDEMA	54	0.0323786	Up	0.114457	0.999947
GO_INOSITOL_1_3_4_5_TETRAKISPHOSPHATE_BINDING	4	-0.040454	Down	0.114587	0.999947
GO_POSITIVE_REGULATION_OF_PROTEIN_TYROSINE_KINASE_ACTIVITY	41	0.0146494	Up	0.114645	0.999947
GO_NUCLEAR_TRANSCRIBED_MRNA_CATABOLIC_PROCESS	220	0.0991581	Down	0.114853	0.999947
RAMJAUN_APOPTOSIS_BY_TGFB1_VIA_MAPK1_UP	10	0.123962	Up	0.114876	0.999947
CHARAFE_BREAST_CANCER_LUMINAL_VS_MESENCHYMAL_UP	420	0.047996	Up	0.114949	0.999947
REACTOME_MITOCHONDRIAL_CALCIUM_ION_TRANSPORT	23	0.0659813	Down	0.115006	0.999947
GO_NEGATIVE_REGULATION_OF_AMYLOID_BETA_CLEARANCE	8	0.0821183	Up	0.11508	0.999947
OHASHI_AURKA_TARGETS	5	-0.0109958	Up	0.115086	0.999947
GO_P38MAPK_CASCADE	38	0.0506913	Up	0.115168	0.999947
REACTOME_COMPLEX_I_BIOGENESIS	58	0.0581799	Down	0.115169	0.999947
GO_POSITIVE_REGULATION_OF_GRANULOCYTE_DIFFERENTIATION	4	0.0447991	Down	0.115268	0.999947
GO_APICAL_JUNCTION_ASSEMBLY	67	0.0379637	Up	0.115292	0.999947
GO_PROTEIN_TARGETING_TO_MEMBRANE	187	0.133406	Down	0.115298	0.999947
GO_NCRNA_EXPORT_FROM_NUCLEUS	37	0.034646	Down	0.115342	0.999947
REACTOME_GLUTAMATE_AND_GLUTAMINE_METABOLISM	14	0.0391929	Down	0.115514	0.999947
GO_L_PHENYLALANINE_METABOLIC_PROCESS	7	0.0847021	Down	0.115646	0.999947
REACTOME_PHENYLALANINE_AND_TYROSINE_METABOLISM	7	0.0847021	Down	0.115646	0.999947
[truncated: 17,976 more rows]
